# Supplementary material for: Dynamic Expression of Genes Involved in Proteoglycan/Glycosaminoglycan Metabolism during Skin Development
Source: Hindawi journal article supplement (doi:10.1155/2018/9873471), 2018-08-29
Supplement: f1 [file 9873471.f1.pdf]

# Supplementary data table 1: Design TLDA cart version 1

This design was used for the developmental study

## Production of precursors

| Tagman Assay ID | Gene symbol     | Function                                                                 |
|-----------------|-----------------|--------------------------------------------------------------------------|
| Mm00511302_m1   | <i>Adpgk</i>    | Phosphorylation of glucose into glucose-6-P                              |
| Mm00617772_g1   | <i>Gale</i>     | Conversion of UDP-GlcNAc to UDP-GalNAc                                   |
| Mm00444182_m1   | <i>Galk1</i>    | Phosphorylation of Galactose into Galactose-1-P                          |
| Mm00613268_m1   | <i>Galk2</i>    | Phosphorylation of N-Acetylgalactosamine (GalNAc) into GalNAc-1P)        |
| Mm00489459_g1   | <i>Galt</i>     | UDP-activation of Glucose-1-P and Galactose-1-P                          |
| Mm00439129_m1   | <i>Gck</i>      | Phosphorylation of glucose into glucose-6-P                              |
| Mm00600127_m1   | <i>Gfpt1</i>    | Conversion of fructose-6-P into glucosamine-6-P (Glc-6-P)                |
| Mm00496565_m1   | <i>Gfpt2</i>    | Conversion of fructose-6-P into Glc-6-P                                  |
| Mm00834602_mH   | <i>Gnpnat1</i>  | Conversion of Glc-6-P into N-Acetylglucosamine-6-P (GlcNAc-6-P)          |
| Mm02026122_g1   | <i>Gpi1</i>     | Isomerisation of glucose-6-P into fructose-6-P                           |
| Mm00439344_m1   | <i>Hk1</i>      | Phosphorylation of glucose into glucose-6-P                              |
| Mm00443385_m1   | <i>Hk2</i>      | Phosphorylation of glucose into glucose-6-P                              |
| Mm00480214_m1   | <i>Miox</i>     | Conversion of Myo-inositol into UDP-GlcA                                 |
| Mm00479878_m1   | <i>Nagk</i>     | Phosphorylation of GlcNAc to GlcNAc-6-P                                  |
| Mm00442283_m1   | <i>Papss1</i>   | Synthesis of PAPS complex                                                |
| Mm00442295_m1   | <i>Papss2</i>   | Synthesis of PAPS complex                                                |
| Mm00804141_m1   | <i>Pgm1</i>     | Conversion of glucose-6-P into glucose-1-P                               |
| Mm00728285_s1   | <i>Pgm2</i>     | Conversion of glucose-6-P into glucose-1-P                               |
| Mm00459270_m1   | <i>Pgm3</i>     | Conversion of GlcNAc-6-P into GlcNAc-1-P                                 |
| Mm00723432_m1   | <i>Pgm5</i>     | Conversion of glucose-6-P into glucose-1-P                               |
| Mm00490339_m1   | <i>Slc13a1</i>  | Transport of sulphate from the extracellular space to cytoplasm          |
| Mm00556495_m1   | <i>Slc13a4</i>  | Transport of sulphate from the extracellular space to cytoplasm          |
| Mm01334459_m1   | <i>Slc13a5</i>  | Transport of sulphate from the extracellular space to cytoplasm          |
| Mm00626632_m1   | <i>Slc26a11</i> | Transport of sulphate from the extracellular space to cytoplasm          |
| Mm00432896_m1   | <i>Slc26a2</i>  | Transport of sulphate from the extracellular space to cytoplasm          |
| Mm00506742_m1   | <i>Slc26a6</i>  | Transport of sulphate from the extracellular space to cytoplasm          |
| Mm00524162_m1   | <i>Slc26a7</i>  | Transport of sulphate from the extracellular space to cytoplasm          |
| Mm00524836_m1   | <i>Slc26a8</i>  | Transport of sulphate from the extracellular space to cytoplasm          |
| Mm00628490_m1   | <i>Slc26a9</i>  | Transport of sulphate from the extracellular space to cytoplasm          |
| Mm00446504_m1   | <i>Slc35a2</i>  | Transport from cytoplasm to Golgi system of UDP-GalNAc and UDP-Galactose |
| Mm00523288_m1   | <i>Slc35a3</i>  | Transport from cytoplasm to Golgi system of UDP-GlcNAc                   |
| Mm00782997_s1   | <i>Slc35a4</i>  | Transport from cytoplasm to Golgi system of UDP-GalNAc and UDP-Galactose |
| Mm00450258_m1   | <i>Slc35b1</i>  | Transport from cytoplasm to Golgi system of UDP-GalNAc and UDP-Galactose |
| Mm01269910_m1   | <i>Slc35b2</i>  | Transport of PAPS complex from cytoplasm to Golgi system                 |
| Mm00506275_m1   | <i>Slc35b3</i>  | Transport of PAPS complex from cytoplasm to Golgi system                 |
| Mm00480588_m1   | <i>Slc35b4</i>  | Transport from cytoplasm to Golgi system of UDP-GlcNAc and UDP-Xylose    |
| Mm00624959_m1   | <i>Slc35d1</i>  | Transport from cytoplasm to Golgi system of UDP-GalNAc and UDP-GlcA      |
| Mm01304830_m1   | <i>Slc35d2</i>  | Transport from cytoplasm to Golgi system of UDP-GlcNAc                   |
| Mm01717003_m1   | <i>Slc35d3</i>  | Paralog of Slc35d1                                                       |
| Mm00505476_m1   | <i>Uap1</i>     | UDP-activation of GlcNAc-1-P and GalNAc-1-P                              |
| Mm00447643_m1   | <i>Ugdh</i>     | Conversion of UDP-glucose into UDP-glucuronic acid (UDP-GlcA)            |
| Mm00454826_m1   | <i>Ugp2</i>     | UDP-activation of Glucose-1-P                                            |
| Mm00550735_m1   | <i>Uxs1</i>     | Conversion of UDP-GlcA into UDP-xylose                                   |

---

## Core proteins

| Taqman Assay ID | Gene symbol    | Function                                                        |
|-----------------|----------------|-----------------------------------------------------------------|
| Mm01545840_m1   | <i>Agrn</i>    | Proteoglycan carrying HS present in ECM                         |
| Mm01277164_m1   | <i>Cd44</i>    | Proteoglycan carrying HS and hyaluronic acid on cell surface    |
| Mm00487131_m1   | <i>Col18a1</i> | Proteoglycan carrying HS present in basement membrane           |
| Mm00497305_m1   | <i>Gpc1</i>    | Proteoglycan carrying HS present on cell surface via GPI-anchor |
| Mm00549650_m1   | <i>Gpc2</i>    | Proteoglycan carrying HS present on cell surface via GPI-anchor |
| Mm00516722_m1   | <i>Gpc3</i>    | Proteoglycan carrying HS present on cell surface via GPI-anchor |
| Mm00515035_m1   | <i>Gpc4</i>    | Proteoglycan carrying HS present on cell surface via GPI-anchor |
| Mm00615599_m1   | <i>Gpc5</i>    | Proteoglycan carrying HS present on cell surface via GPI-anchor |
| Mm00516235_m1   | <i>Gpc6</i>    | Proteoglycan carrying HS present on cell surface via GPI-anchor |
| Mm01181179_g1   | <i>Hspg2</i>   | Proteoglycan carrying HS present in ECM                         |
| Mm00448918_m1   | <i>Sdc1</i>    | Proteoglycan carrying HS present on cell surface                |
| Mm00484718_m1   | <i>Sdc2</i>    | Proteoglycan carrying HS present on cell surface                |
| Mm01179831_m1   | <i>Sdc3</i>    | Proteoglycan carrying HS present on cell surface                |
| Mm00488527_m1   | <i>Sdc4</i>    | Proteoglycan carrying HS present on cell surface                |

---

## Preparation of linkage region

| Taqman Assay ID | Gene symbol    | Function                                                            |
|-----------------|----------------|---------------------------------------------------------------------|
| Mm00504458_s1   | <i>B3galt6</i> | Transferring UDP-galactose to galactose-xylose on proteoglycan      |
| Mm00661499_m1   | <i>B3gat1</i>  | Transferring UDP-GlcA to galactose-galactose-xylose on proteoglycan |
| Mm00549042_m1   | <i>B3gat2</i>  | Transferring UDP-GlcA to galactose-galactose-xylose on proteoglycan |
| Mm00470389_m1   | <i>B3gat3</i>  | Transferring UDP-GlcA to galactose-galactose-xylose on proteoglycan |
| Mm00479556_m1   | <i>B4galt2</i> | Transferring UDP-galactose to GlcNAc, Glc, and Xyl.                 |
| Mm00461357_m1   | <i>B4galt7</i> | Transferring UDP-galactose to xylose on proteoglycan                |
| Mm00558690_m1   | <i>Xylt1</i>   | Transferring UDP-xylose to proteoglycan                             |
| Mm00461181_m1   | <i>Xylt2</i>   | Transferring UDP-xylose to proteoglycan                             |

---

## Glycosaminoglycan chain polymerisation

| Taqman Assay ID | Gene symbol       | Function                                                   |
|-----------------|-------------------|------------------------------------------------------------|
| Mm01262239_g1   | <i>Chpf</i>       | Transferring UDP-GlcA to GalNAc at end of sugar chain (CS) |
| Mm01319178_m1   | <i>Chsy1</i>      | Transferring UDP-GlcA to GalNAc at end of sugar chain (CS) |
| Mm01545329_m1   | <i>Chsy3</i>      | Transferring UDP-GlcA to GalNAc at end of sugar chain (CS) |
| Mm00555164_m1   | <i>Csgalnact1</i> | Transferring UDP-GalNAc to GlcA at end of sugar chain (CS) |
| Mm00513340_m1   | <i>Csgalnact2</i> | Transferring UDP-GalNAc to GlcA at end of sugar chain (CS) |
| Mm00468769_m1   | <i>Ext1</i>       | Transferring UDP-GlcNAc to GlcA at end of sugar chain (HS) |
| Mm00468775_m1   | <i>Ext2</i>       | Transferring UDP-GlcNAc to GlcA at end of sugar chain (HS) |
| Mm00621977_s1   | <i>Extl1</i>      | Transferring UDP-GlcA to GlcNAc at end of sugar chain (HS) |
| Mm00469621_m1   | <i>Extl2</i>      | Transferring UDP-GlcA to GlcNAc at end of sugar chain (HS) |
| Mm00516994_m1   | <i>Extl3</i>      | Transferring UDP-GlcA to GlcNAc at end of sugar chain (HS) |
| Mm00468496_m1   | <i>Has1</i>       | Polymerisation of hyaluronic acid                          |
| Mm00515089_m1   | <i>Has2</i>       | Polymerisation of hyaluronic acid                          |
| Mm00515091_m1   | <i>Has3</i>       | Polymerisation of hyaluronic acid                          |

---

## Glycosaminoglycan chain modification

| Taqman Assay ID | Gene symbol     | Function                                                                                  |
|-----------------|-----------------|-------------------------------------------------------------------------------------------|
| Mm00517563_m1   | <i>Chst11</i>   | Sulfation at the 4-O position of GalNAc units (CS)                                        |
| Mm00546416_s1   | <i>Chst12</i>   | Sulfation at the 4-O position of GalNAc units (CS)                                        |
| Mm01186255_s1   | <i>Chst13</i>   | Sulfation at the 4-O position of GalNAc units (CS)                                        |
| Mm00511291_s1   | <i>Chst14</i>   | Sulfation at the 4-O position of GalNAc units (CS)                                        |
| Mm00513227_m1   | <i>Chst15</i>   | Sulfation at the 6-O position of GalNAc units (CS)                                        |
| Mm00490018_g1   | <i>Chst2</i>    | Sulfation at the 6-O position of GalNAc units (CS)                                        |
| Mm00489736_m1   | <i>Chst3</i>    | Sulfation at the 6-O position of GalNAc units (CS)                                        |
| Mm00488783_s1   | <i>Chst4</i>    | Sulfation at the 6-O position of GalNAc units (CS)                                        |
| Mm00517342_m1   | <i>Chst5</i>    | Sulfation at the 6-O position of GalNAc units (CS)                                        |
| Mm00491466_m1   | <i>Chst7</i>    | Sulfation at the 6-O position of GalNAc units (CS)                                        |
| Mm00558321_m1   | <i>Chst8</i>    | Sulfation at the 4-O position of GalNAc units (CS)                                        |
| Mm01722279_m1   | <i>Chst9</i>    | Sulfation at the 4-O position of GalNAc units (CS)                                        |
| Mm00552923_m1   | <i>Dse</i>      | Epimerisation of GlcA unit into iduronic acid unit (IdoA) (CS)                            |
| Mm00473667_m1   | <i>Glce</i>     | Epimerisation of GlcA unit into iduronic acid unit (IdoA) (HS)                            |
| Mm00478684_m1   | <i>Hs2st1</i>   | Sulfation at the 2-O position of GlcA and IdoA units (HS)                                 |
| Mm01964038_s1   | <i>Hs3st1</i>   | Sulfation at the 3-O position of GlcNAc and GlcNS units sulfated at the 6-O position (HS) |
| Mm00616933_m1   | <i>Hs3st2</i>   | Sulfation at the 3-O position of GlcNAc and GlcNS units sulfated at the 6-O position (HS) |
| Mm00780907_s1   | <i>Hs3st3a1</i> | Sulfation at the 3-O position of GlcNAc and GlcNS units sulfated at the 6-O position (HS) |
| Mm00479621_m1   | <i>Hs3st3b1</i> | Sulfation at the 3-O position of GlcNAc and GlcNS units sulfated at the 6-O position (HS) |
| Mm01299930_m1   | <i>Hs3st6</i>   | Sulfation at the 3-O position of GlcNAc and GlcNS units sulfated at the 6-O position (HS) |
| Mm01229698_s1   | <i>Hs6st1</i>   | Sulfation at the 6-O position of GlcNAc and N-sulfated-glucuronic acid units (GlcNS) (HS) |
| Mm00479296_m1   | <i>Hs6st2</i>   | Sulfation at the 6-O position of GlcNAc and GlcNS units (HS)                              |
| Mm00479297_m1   | <i>Hs6st3</i>   | Sulfation at the 6-O position of GlcNAc and GlcNS units (HS)                              |
| Mm00447005_m1   | <i>Ndst1</i>    | N-de-acetylation and N-sulfation of GlcNAc unit (HS)                                      |
| Mm00447818_m1   | <i>Ndst2</i>    | N-de-acetylation and N-sulfation of GlcNAc unit (HS)                                      |
| Mm00453178_m1   | <i>Ndst3</i>    | N-de-acetylation and N-sulfation of GlcNAc unit (HS)                                      |
| Mm00480767_m1   | <i>Ndst4</i>    | N-de-acetylation and N-sulfation of GlcNAc unit (HS)                                      |
| Mm00552283_m1   | <i>Sulf1</i>    | Desulfation of the 6-O position of 6-O sulfated GlcNAc and GlcNS units (HS)               |
| Mm00511193_m1   | <i>Sulf2</i>    | Desulfation of the 6-O position of 6-O sulfated GlcNAc and GlcNS units (HS)               |
| Mm00461213_m1   | <i>Sumf1</i>    | Cofactor for Sulf1 and Sulf 2 (HS)                                                        |
| Mm01197721_m1   | <i>Sumf2</i>    | Cofactor for Sulf1 and Sulf 2 (HS)                                                        |
| Mm00616790_m1   | <i>Ust</i>      | Sulfation at the 2-O position of GlcA and IdoA units (CS)                                 |

## Glycosaminoglycan chain degradation

| Taqman Assay ID | Gene symbol   | Function                                                                            |
|-----------------|---------------|-------------------------------------------------------------------------------------|
| Mm00802167_m1   | <i>Arsb</i>   | Desulfation of the 4-O position of 4-O sulfated GalNAc units (CS)                   |
| Mm00557970_m1   | <i>Arsj</i>   | Desulfation of the 4-O position of 4-O sulfated GalNAc units (CS)                   |
| Mm00513099_m1   | <i>Arsk</i>   | Desulfation of proteoglycans, paralog of IDS                                        |
| Mm00489575_m1   | <i>Galns</i>  | Desulfation of the 6-O position of 6-O sulfated GalNAc units (CS)                   |
| Mm00659592_m1   | <i>Gns</i>    | Desulfation of the 6-O position of 6-O sulfated GlcNAc and GlcNS units (HS)         |
| Mm00446954_g1   | <i>Gusb</i>   | Hydrolysis of GlcA from sugar chain (HS and Hyaluronic acid and CS)                 |
| Mm00599877_m1   | <i>Hexa</i>   | Hydrolysis of GalNAc units (CS) and GlcNAc units (hyaluronic acid) from sugar chain |
| Mm00599880_m1   | <i>Hexb</i>   | Hydrolysis of GalNAc units (CS) and GlcNAc units (hyaluronic acid) from sugar chain |
| Mm00519485_m1   | <i>Hgsnat</i> | Acetylation of desulfated GlcNS units (HS)                                          |
| Mm00461768_m1   | <i>Hpse</i>   | Degradation of HS chains extracellularly                                            |
| Mm00476206_m1   | <i>Hyal1</i>  | Degradation of hyaluronic acid chain                                                |
| Mm00477731_m1   | <i>Hyal2</i>  | Degradation of hyaluronic acid chain                                                |
| Mm00662097_m1   | <i>Hyal3</i>  | Degradation of hyaluronic acid chain                                                |
| Mm00494868_m1   | <i>Ids</i>    | Desulfation of 2-O sulfated IdoA and GlcA units (HS and CS)                         |
| Mm00515143_m1   | <i>Idua</i>   | Hydrolysis of IdoA unit from sugar chain (HS and CS)                                |
| Mm00452409_m1   | <i>Mgea5</i>  | Degradation of hyaluronic acid chain                                                |
| Mm00476274_m1   | <i>Naga</i>   | Hydrolysis N-GalNAc moieties from glycoconjugates.                                  |
| Mm00479175_m1   | <i>Naglu</i>  | Hydrolysis of GlcNAc from sugar chain (HS)                                          |
| Mm00450747_m1   | <i>Sqsh</i>   | Desulfation of GlcNS units (HS)                                                     |

---

## Growth factors

| Taqman Assay ID | Gene symbol   | Function                                                                        |
|-----------------|---------------|---------------------------------------------------------------------------------|
| Mm00437583_m1   | <i>Areg</i>   | Amphiregulin **                                                                 |
| Mm00557790_m1   | <i>Bmp3</i>   | Bone morphogenetic growth factor 3 **                                           |
| Mm00432091_m1   | <i>Bmp5</i>   | Bone morphogenetic growth factor 5 **                                           |
| Mm01192931_g1   | <i>Ctgf</i>   | Connective tissue growth factor, embryonic growth factor in skin development ** |
| Mm00433275_m1   | <i>Fgf10</i>  | Fibroblast growth factor 10 **                                                  |
| Mm00438910_m1   | <i>Fgf13</i>  | Fibroblast growth factor 13 **                                                  |
| Mm01285715_m1   | <i>Fgf2</i>   | Fibroblast growth factor 2 **                                                   |
| Mm00748347_m1   | <i>Fgf20</i>  | Fibroblast growth factor 20 **                                                  |
| Mm00445749_m1   | <i>Fgf22</i>  | Fibroblast growth factor 22 **                                                  |
| Mm00433291_m1   | <i>Fgf7</i>   | Fibroblast growth factor 7 **                                                   |
| Mm00438921_m1   | <i>Fgf8</i>   | Fibroblast growth factor 8 **                                                   |
| Mm01131929_m1   | <i>Figf</i>   | C-fos induced growth factor **                                                  |
| Mm03024279_s1   | <i>Gdf10</i>  | Growth differentiation factor 10 **                                             |
| Mm00439305_g1   | <i>Hbegf</i>  | Heparin-binding epidermal growth factor **                                      |
| Mm00725733_s1   | <i>Hdgf</i>   | Hepatoma-derived growth factor **                                               |
| Mm00439560_m1   | <i>Igf1</i>   | Insulin-like growth factor 1 **                                                 |
| Mm00439565_g1   | <i>Igf2</i>   | Insulin-like growth factor 2 **                                                 |
| Mm01297833_s1   | <i>Nog</i>    | Noggin **                                                                       |
| Mm01205760_m1   | <i>Pdgfa</i>  | Platelet-derived growth factor a **                                             |
| Mm01298578_m1   | <i>Pdgfb</i>  | Platelet-derived growth factor b **                                             |
| Mm00480205_m1   | <i>Pdgfc</i>  | Platelet-derived growth factor c **                                             |
| Mm00546829_m1   | <i>Pdgfd</i>  | Platelet-derived growth factor d **                                             |
| Mm00436527_m1   | <i>Shh</i>    | Sonic hedgehog **                                                               |
| Mm01178820_m1   | <i>Tgfb1</i>  | Transforming growth factor beta 1 **                                            |
| Mm01321739_m1   | <i>Tgfb2</i>  | Transforming growth factor beta 2 **                                            |
| Mm01307950_m1   | <i>Tgfb3</i>  | Transforming growth factor beta 3 **                                            |
| Mm01281447_m1   | <i>Vegfa</i>  | Vascular endothelial growth factor a **                                         |
| Mm00442102_m1   | <i>Vegfb</i>  | Vascular endothelial growth factor b **                                         |
| Mm00437313_m1   | <i>Vegfc</i>  | Vascular endothelial growth factor c **                                         |
| Mm00442104_m1   | <i>Wnt10b</i> | Wingless-related integration site 10b **                                        |
| Mm00446420_m1   | <i>Wnt16</i>  | Wingless-related integration site 16 **                                         |
| Mm00470018_m1   | <i>Wnt2</i>   | Wingless-related integration site 2 **                                          |
| Mm00437330_m1   | <i>Wnt2b</i>  | Wingless-related integration site 2b **                                         |
| Mm00437337_m1   | <i>Wnt3a</i>  | Wingless-related integration site 3a **                                         |
| Mm00437353_m1   | <i>Wnt6</i>   | Wingless-related integration site 6 **                                          |
| Mm00437355_m1   | <i>Wnt7a</i>  | Wingless-related integration site 7a **                                         |
| Mm00437357_m1   | <i>Wnt7b</i>  | Wingless-related integration site 7b **                                         |

---

## Putatively involved

| Tagman Assay ID | Gene symbol      | Function                                                                             |
|-----------------|------------------|--------------------------------------------------------------------------------------|
| Hs99999901_s1   | <i>18S</i>       | Reference gene                                                                       |
| Mm00802173_g1   | <i>Arsa</i>      | Desulfation of cerebroside                                                           |
| Mm00546931_m1   | <i>Arsg</i>      | Paralog of Arsa                                                                      |
| Mm00480272_s1   | <i>B3galnt1</i>  | Transferring UDP-GalNAc or UDP-GlcNAc to N-GlcNAc, Galactose or N-GalNAc             |
| Mm01189804_m1   | <i>B4galnt3</i>  | Transferring UDP-GalNAc or UDP-GlcNAc to N-GlcNAc, Galactose or N-GalNAc             |
| Mm00625968_g1   | <i>B4galnt4</i>  | Transferring UDP-GalNAc or UDP-GlcNAc to N-GlcNAc, Galactose or N-GalNAc             |
| Mm00473986_m1   | <i>C1galt1</i>   | Transferring UDP-Gal to N-GalNAc.                                                    |
| Mm00480676_m1   | <i>C1galt1c1</i> | C1GALT1-specific chaperone 1                                                         |
| Mm00517855_m1   | <i>Chst1</i>     | Involved in sulfation of keratin sulfate                                             |
| Mm03302249_g1   | <i>Gapdh</i>     | Reference gene                                                                       |
| Mm00516323_m1   | <i>Gla</i>       | Hydrolysis of galactose units                                                        |
| Mm00515342_m1   | <i>Glb1</i>      | Hydrolysis of galactose units                                                        |
| Mm00464245_m1   | <i>Glb1l2</i>    | Hydrolysis of galactose units                                                        |
| Mm01254913_g1   | <i>Gnpda1</i>    | Conversion of GlcNAc-6-P into fructose-6-P                                           |
| Mm00503573_m1   | <i>Gnpda2</i>    | Conversion of GlcNAc-6-P into fructose-6-P                                           |
| Mm00434647_m1   | <i>Khk</i>       | Phosphorylating fructose to fructose-1-P                                             |
| Mm00502002_m1   | <i>Kl</i>        | Putative glucuronidase                                                               |
| Mm00473122_m1   | <i>Klb</i>       | Putative glucuronidase                                                               |
| Mm00491720_m1   | <i>Renbp</i>     | Concersion of N-GlcNAc to N-acetylmannosamine                                        |
| Mm00555344_m1   | <i>Slc17a5</i>   | Transport of GlcA from lysosoom to cytoplasm                                         |
| Mm00445313_m1   | <i>Slc26a3</i>   | Transferring chloride ions across the cell membrane in exchange for bicarbonate ions |
| Mm00442308_m1   | <i>Slc26a4</i>   | Transferring chloride ions across the cell membrane                                  |
| Mm00446145_m1   | <i>Slc26a5</i>   | Protein functions as a molecular motor in motile outer hair cells of the cochlea     |
| Mm00442341_m1   | <i>Slc35a1</i>   | Putative CMP-Sialic Acid Transporter                                                 |
| Mm01277045_m1   | <i>Tbp</i>       | Reference gene                                                                       |
| Mm00495930_m1   | <i>Ugt8a</i>     | Transfere galactose to ceramide                                                      |

\* Glc, glucosamine; GlcNAc, N-acetylated glucosamine; Gal, galactosamine; GalNAc, N-acetylated galactosamine; GlcA, glucuronic acid; IdoA, iduronic acid.

\*\*Uijtdewilligen *et al*, 2016.

## Supplementary data table 2: Design TLDA cart version 2

This design was used for analysis of skin from *Glc* knock out and *HSP*Etg mice

### Production of precursors

| Tagman Assay ID | Gene symbol          | Function                                                                 |
|-----------------|----------------------|--------------------------------------------------------------------------|
| Mm00511302_m1   | <i>Adpgk</i>         | Phosphorylation of glucose into glucose-6-P                              |
| Mm00617772_g1   | <i>Gale</i>          | Conversion of UDP-GlcNAc to UDP-GalNAc                                   |
| Mm00444182_m1   | <i>Galk1</i>         | Phosphorylation of Galactose into Galactose-1-P                          |
| Mm00613268_m1   | <i>Galk2</i>         | Phosphorylation of N-Acetylgalactosamine (GalNAc) into GalNAc-1P)        |
| Mm00489459_g1   | <i>Galt</i>          | UDP-activation of Glucose-1-P and Galactose-1-P                          |
| Mm00439129_m1   | <i>Gck</i>           | Phosphorylation of glucose into glucose-6-P                              |
| Mm00600127_m1   | <i>Gfpt1</i>         | Conversion of fructose-6-P into glucosamine-6-P (Glc-6-P)                |
| Mm00496565_m1   | <i>Gfpt2</i>         | Conversion of fructose-6-P into Glc-6-P                                  |
| Mm00834602_mH   | <i>Gnpat1</i>        | Conversion of Glc-6-P into N-Acetylglucosamine-6-P (GlcNAc-6-P)          |
| Mm02026122_g1   | <i>Gpi1</i>          | Isomerisation of glucose-6-P into fructose-6-P                           |
| Mm00439344_m1   | <i>Hk1</i>           | Phosphorylation of glucose into glucose-6-P                              |
| Mm00443385_m1   | <i>Hk2</i>           | Phosphorylation of glucose into glucose-6-P                              |
| Mm00480214_m1   | <i>Miox</i>          | Conversion of Myo-inositol into UDP-GlcA                                 |
| Mm00479878_m1   | <i>Nagk</i>          | Phosphorylation of GlcNAc to GlcNAc-6-P                                  |
| Mm00442283_m1   | <i>Papss1</i>        | Synthesis of PAPS complex                                                |
| Mm00442295_m1   | <i>Papss2</i>        | Synthesis of PAPS complex                                                |
| Mm00804141_m1   | <i>Pgm1</i>          | Conversion of glucose-6-P into glucose-1-P                               |
| Mm00728285_s1   | <i>Pgm2</i>          | Conversion of glucose-6-P into glucose-1-P                               |
| Mm00459270_m1   | <i>Pgm3</i>          | Conversion of GlcNAc-6-P into GlcNAc-1-P                                 |
| Mm00723432_m1   | <i>Pgm5</i>          | Conversion of glucose-6-P into glucose-1-P                               |
| Mm00490339_m1   | <i>Slc13a1</i>       | Transport of sulphate from the extracellular space to cytoplasm          |
| Mm00556495_m1   | <i>Slc13a4</i>       | Transport of sulphate from the extracellular space to cytoplasm          |
| Mm01334459_m1   | <i>Slc13a5</i>       | Transport of sulphate from the extracellular space to cytoplasm          |
| Mm00626632_m1   | <i>Slc26a11</i>      | Transport of sulphate from the extracellular space to cytoplasm          |
| Mm00432896_m1   | <i>Slc26a2</i>       | Transport of sulphate from the extracellular space to cytoplasm          |
| Mm00506742_m1   | <i>Slc26a6</i>       | Transport of sulphate from the extracellular space to cytoplasm          |
| Mm00524162_m1   | <i>Slc26a7</i>       | Transport of sulphate from the extracellular space to cytoplasm          |
| Mm00524836_m1   | <i>Slc26a8</i>       | Transport of sulphate from the extracellular space to cytoplasm          |
| Mm00628490_m1   | <i>Slc26a9</i>       | Transport of sulphate from the extracellular space to cytoplasm          |
| Mm01192270_m1   | <i>Slc2a1 (new)</i>  | Sugar transport across plasma membrane                                   |
| Mm00453716_m1   | <i>Slc2a10 (new)</i> | Sugar transport across plasma membrane                                   |
| Mm00619244_m1   | <i>Slc2a12 (new)</i> | Sugar transport across plasma membrane                                   |
| Mm00446230_g1   | <i>Slc2a2 (new)</i>  | Sugar transport across plasma membrane                                   |
| Mm00441483_m1   | <i>Slc2a3 (new)</i>  | Sugar transport across plasma membrane                                   |
| Mm01245507_g1   | <i>Slc2a4 (new)</i>  | Sugar transport across plasma membrane                                   |
| Mm00600311_m1   | <i>Slc2a5 (new)</i>  | Sugar transport across plasma membrane                                   |
| Mm00554217_m1   | <i>Slc2a6 (new)</i>  | Sugar transport across plasma membrane                                   |
| Mm00444634_m1   | <i>Slc2a8 (new)</i>  | Sugar transport across plasma membrane                                   |
| Mm01211147_m1   | <i>Slc2a9 (new)</i>  | Sugar transport across plasma membrane                                   |
| Mm00446504_m1   | <i>Slc35a2</i>       | Transport from cytoplasm to Golgi system of UDP-GalNAc and UDP-Galactose |
| Mm00523288_m1   | <i>Slc35a3</i>       | Transport from cytoplasm to Golgi system of UDP-GlcNAc                   |
| Mm00782997_s1   | <i>Slc35a4</i>       | Transport from cytoplasm to Golgi system of UDP-GalNAc and UDP-Galactose |
| Mm00450258_m1   | <i>Slc35b1</i>       | Transport from cytoplasm to Golgi system of UDP-GalNAc and UDP-Galactose |
| Mm01269910_m1   | <i>Slc35b2</i>       | Transport of PAPS complex from cytoplasm to Golgi system                 |
| Mm00506268_m1   | <i>Slc35b3</i>       | Transport of PAPS complex from cytoplasm to Golgi system                 |
| Mm00480588_m1   | <i>Slc35b4</i>       | Transport from cytoplasm to Golgi system of UDP-GlcNAc and UDP-Xylose    |
| Mm00624959_m1   | <i>Slc35d1</i>       | Transport from cytoplasm to Golgi system of UDP-GalNAc and UDP-GlcA      |
| Mm01304830_m1   | <i>Slc35d2</i>       | Transport from cytoplasm to Golgi system of UDP-GlcNAc                   |
| Mm01717003_m1   | <i>Slc35d3</i>       | Paralog of Slc35d1                                                       |
| Mm00769477_m1   | <i>Uap1</i>          | UDP-activation of GlcNAc-1-P and GalNAc-1-P                              |
| Mm00447643_m1   | <i>Ugdh</i>          | Conversion of UDP-glucose into UDP-glucuronic acid (UDP-GlcA)            |
| Mm00454826_m1   | <i>Ugp2</i>          | UDP-activation of Glucose-1-P                                            |
| Mm00550735_m1   | <i>Uxs1</i>          | Conversion of UDP-GlcA into UDP-xylose                                   |

## Core proteins

| <b>Taqman Assay ID</b> | <b>Gene symbol</b>  | <b>Function</b>                                                 |
|------------------------|---------------------|-----------------------------------------------------------------|
| Mm00545807_m1          | <i>Acan (new)</i>   | Proteoglycan carrying CS or DS                                  |
| Mm01264855_m1          | <i>Agrn</i>         | Proteoglycan carrying HS present in ECM                         |
| Mm00445945_m1          | <i>Aspn (new)</i>   | Proteoglycan carrying CS or DS                                  |
| Mm00476090_m1          | <i>Bcan (new)</i>   | Proteoglycan carrying CS or DS                                  |
| Mm00455918_m1          | <i>Bgn (new)</i>    | Proteoglycan carrying CS or DS                                  |
| Mm01277164_m1          | <i>Cd44</i>         | Proteoglycan carrying HS and hyaluronic acid on cell surface    |
| Mm00487131_m1          | <i>Col18a1</i>      | Proteoglycan carrying HS present in basement membrane           |
| Mm00483872_m1          | <i>Col9a2 (new)</i> | Proteoglycan carrying CS or DS                                  |
| Mm00507256_m1          | <i>Cspg4 (new)</i>  | Proteoglycan carrying CS or DS                                  |
| Mm00516549_m1          | <i>Cspg5 (new)</i>  | Proteoglycan carrying CS or DS                                  |
| Mm03003496_s1          | <i>Dcn (new)</i>    | Proteoglycan carrying CS or DS                                  |
| Mm00514611_m1          | <i>Epyc (new)</i>   | Proteoglycan carrying CS or DS                                  |
| Mm00497305_m1          | <i>Gpc1</i>         | Proteoglycan carrying HS present on cell surface via GPI-anchor |
| Mm00549650_m1          | <i>Gpc2</i>         | Proteoglycan carrying HS present on cell surface via GPI-anchor |
| Mm00516722_m1          | <i>Gpc3</i>         | Proteoglycan carrying HS present on cell surface via GPI-anchor |
| Mm00515035_m1          | <i>Gpc4</i>         | Proteoglycan carrying HS present on cell surface via GPI-anchor |
| Mm00615599_m1          | <i>Gpc5</i>         | Proteoglycan carrying HS present on cell surface via GPI-anchor |
| Mm00516235_m1          | <i>Gpc6</i>         | Proteoglycan carrying HS present on cell surface via GPI-anchor |
| Mm00469183_m1          | <i>Hmmer (new)</i>  | Hyaluronan-Mediated Motility Receptor                           |
| Mm01181165_m1          | <i>Hspg2</i>        | Proteoglycan carrying HS present in ECM                         |
| Mm00484007_m1          | <i>Ncan (new)</i>   | Proteoglycan carrying CS or DS                                  |
| Mm00448918_m1          | <i>Sdc1</i>         | Proteoglycan carrying HS present on cell surface                |
| Mm00484718_m1          | <i>Sdc2</i>         | Proteoglycan carrying HS present on cell surface                |
| Mm01179831_m1          | <i>Sdc3</i>         | Proteoglycan carrying HS present on cell surface                |
| Mm00488527_m1          | <i>Sdc4</i>         | Proteoglycan carrying HS present on cell surface                |
| Mm00484015_m1          | <i>Smc3 (new)</i>   | Proteoglycan carrying CS or DS                                  |
| Mm01169070_m1          | <i>Srgn (new)</i>   | Proteoglycan carrying CS or DS                                  |
| Mm01283063_m1          | <i>Vcan (new)</i>   | Proteoglycan carrying CS or DS                                  |

## Preparation of linkage region

| <b>Taqman Assay ID</b> | <b>Gene symbol</b> | <b>Function</b>                                                     |
|------------------------|--------------------|---------------------------------------------------------------------|
| Mm00504458_s1          | <i>B3galt6</i>     | Transferring UDP-galactose to galactose-xylose on proteoglycan      |
| Mm00661499_m1          | <i>B3gat1</i>      | Transferring UDP-GlcA to galactose-galactose-xylose on proteoglycan |
| Mm00549042_m1          | <i>B3gat2</i>      | Transferring UDP-GlcA to galactose-galactose-xylose on proteoglycan |
| Mm00470389_m1          | <i>B3gat3</i>      | Transferring UDP-GlcA to galactose-galactose-xylose on proteoglycan |
| Mm00479556_m1          | <i>B4galt2</i>     | Transferring UDP-galactose to GlcNAc, Glc, and Xyl.                 |
| Mm00461357_m1          | <i>B4galt7</i>     | Transferring UDP-galactose to xylose on proteoglycan                |
| Mm00558690_m1          | <i>Xylt1</i>       | Transferring UDP-xylose to proteoglycan                             |
| Mm00461181_m1          | <i>Xylt2</i>       | Transferring UDP-xylose to proteoglycan                             |

## Glycosaminoglycan chain polymerisation

| <b>Taqman Assay ID</b> | <b>Gene symbol</b> | <b>Function</b>                                            |
|------------------------|--------------------|------------------------------------------------------------|
| Mm01262239_g1          | <i>Chpf</i>        | Transferring UDP-GlcA to GalNAc at end of sugar chain (CS) |
| Mm01319178_m1          | <i>Chsy1</i>       | Transferring UDP-GlcA to GalNAc at end of sugar chain (CS) |
| Mm01545329_m1          | <i>Chsy3</i>       | Transferring UDP-GlcA to GalNAc at end of sugar chain (CS) |
| Mm00555164_m1          | <i>Csgalnact1</i>  | Transferring UDP-GalNAc to GlcA at end of sugar chain (CS) |
| Mm00513340_m1          | <i>Csgalnact2</i>  | Transferring UDP-GalNAc to GlcA at end of sugar chain (CS) |
| Mm00468769_m1          | <i>Ext1</i>        | Transferring UDP-GlcNAc to GlcA at end of sugar chain (HS) |
| Mm00468775_m1          | <i>Ext2</i>        | Transferring UDP-GlcNAc to GlcA at end of sugar chain (HS) |
| Mm00621977_s1          | <i>Extl1</i>       | Transferring UDP-GlcA to GlcNAc at end of sugar chain (HS) |
| Mm00469621_m1          | <i>Extl2</i>       | Transferring UDP-GlcA to GlcNAc at end of sugar chain (HS) |
| Mm00516994_m1          | <i>Extl3</i>       | Transferring UDP-GlcA to GlcNAc at end of sugar chain (HS) |
| Mm00468496_m1          | <i>Has1</i>        | Polymerisation of hyaluronic acid                          |
| Mm00515089_m1          | <i>Has2</i>        | Polymerisation of hyaluronic acid                          |
| Mm00515091_m1          | <i>Has3</i>        | Polymerisation of hyaluronic acid                          |

## Glycosaminoglycan chain modification

| Taqman Assay ID | Gene symbol         | Function                                                                                  |
|-----------------|---------------------|-------------------------------------------------------------------------------------------|
| Mm00517563_m1   | <i>Chst11</i>       | Sulfation at the 4-O position of GalNAc units (CS)                                        |
| Mm00546416_s1   | <i>Chst12</i>       | Sulfation at the 4-O position of GalNAc units (CS)                                        |
| Mm01186255_s1   | <i>Chst13</i>       | Sulfation at the 4-O position of GalNAc units (CS)                                        |
| Mm00511291_s1   | <i>Chst14</i>       | Sulfation at the 4-O position of GalNAc units (CS)                                        |
| Mm00513227_m1   | <i>Chst15</i>       | Sulfation at the 6-O position of GalNAc units (CS)                                        |
| Mm00490018_g1   | <i>Chst2</i>        | Sulfation at the 6-O position of GalNAc units (CS)                                        |
| Mm00489736_m1   | <i>Chst3</i>        | Sulfation at the 6-O position of GalNAc units (CS)                                        |
| Mm00517342_m1   | <i>Chst5</i>        | Sulfation at the 6-O position of GalNAc units (CS)                                        |
| Mm00491466_m1   | <i>Chst7</i>        | Sulfation at the 6-O position of GalNAc units (CS)                                        |
| Mm00558321_m1   | <i>Chst8</i>        | Sulfation at the 4-O position of GalNAc units (CS)                                        |
| Mm01722279_m1   | <i>Chst9</i>        | Sulfation at the 4-O position of GalNAc units (CS)                                        |
| Mm00552923_m1   | <i>Dse</i>          | Epimerisation of GlcA unit into iduronic acid unit (IdoA) (CS)                            |
| Mm00473667_m1   | <i>Glce</i>         | Epimerisation of GlcA unit into iduronic acid unit (IdoA) (HS)                            |
| Mm00478684_m1   | <i>Hs2st1</i>       | Sulfation at the 2-O position of GlcA and IdoA units (HS)                                 |
| Mm01964038_s1   | <i>Hs3st1</i>       | Sulfation at the 3-O position of GlcNAc and GlcNS units sulfated at the 6-O position (HS) |
| Mm00616933_m1   | <i>Hs3st2</i>       | Sulfation at the 3-O position of GlcNAc and GlcNS units sulfated at the 6-O position (HS) |
| Mm00780907_s1   | <i>Hs3st3a1</i>     | Sulfation at the 3-O position of GlcNAc and GlcNS units sulfated at the 6-O position (HS) |
| Mm00479621_m1   | <i>Hs3st3b1</i>     | Sulfation at the 3-O position of GlcNAc and GlcNS units sulfated at the 6-O position (HS) |
| Mm01192940_m1   | <i>Hs3st5 (new)</i> | Sulfation at the 3-O position of GlcNAc and GlcNS units sulfated at the 6-O position (HS) |
| Mm01299930_m1   | <i>Hs3st6</i>       | Sulfation at the 3-O position of GlcNAc and GlcNS units sulfated at the 6-O position (HS) |
| Mm01229698_s1   | <i>Hs6st1</i>       | Sulfation at the 6-O position of GlcNAc and N-sulfated-glucuronic acid units (GlcNS) (HS) |
| Mm00479296_m1   | <i>Hs6st2</i>       | Sulfation at the 6-O position of GlcNAc and GlcNS units (HS)                              |
| Mm00479297_m1   | <i>Hs6st3</i>       | Sulfation at the 6-O position of GlcNAc and GlcNS units (HS)                              |
| Mm00447005_m1   | <i>Ndst1</i>        | N-de-acetylation and N-sulfation of GlcNAc unit (HS)                                      |
| Mm00447818_m1   | <i>Ndst2</i>        | N-de-acetylation and N-sulfation of GlcNAc unit (HS)                                      |
| Mm00453178_m1   | <i>Ndst3</i>        | N-de-acetylation and N-sulfation of GlcNAc unit (HS)                                      |
| Mm00480767_m1   | <i>Ndst4</i>        | N-de-acetylation and N-sulfation of GlcNAc unit (HS)                                      |
| Mm00552283_m1   | <i>Sulf1</i>        | Desulfation of the 6-O position of 6-O sulfated GlcNAc and GlcNS units (HS)               |
| Mm01248026_m1   | <i>Sulf2</i>        | Desulfation of the 6-O position of 6-O sulfated GlcNAc and GlcNS units (HS)               |
| Mm00461213_m1   | <i>Sumf1</i>        | Cofactor for Sulf1 and Sulf 2 (HS)                                                        |
| Mm01197721_m1   | <i>Sumf2</i>        | Cofactor for Sulf1 and Sulf 2 (HS)                                                        |
| Mm00616790_m1   | <i>Ust</i>          | Sulfation at the 2-O position of GlcA and IdoA units (CS)                                 |

## Glycosaminoglycan chain degradation

| Taqman Assay ID | Gene symbol       | Function                                                                            |
|-----------------|-------------------|-------------------------------------------------------------------------------------|
| Mm00503655_s1   | <i>Arsb</i>       | Desulfation of the 4-O position of 4-O sulfated GalNAc units (CS)                   |
| Mm00557970_m1   | <i>Arsj</i>       | Desulfation of the 4-O position of 4-O sulfated GalNAc units (CS)                   |
| Mm00513099_m1   | <i>Arsk</i>       | Desulfation of proteoglycans, paralog of IDS                                        |
| Mm00489576_m1   | <i>Galns</i>      | Desulfation of the 6-O position of 6-O sulfated GalNAc units (CS)                   |
| Mm00659592_m1   | <i>Gns</i>        | Desulfation of the 6-O position of 6-O sulfated GlcNAc and GlcNS units (HS)         |
| Mm01197698_m1   | <i>Gusb</i>       | Hydrolysis of GlcA from sugar chain (HS and Hyaluronic acid and CS)                 |
| Mm00599877_m1   | <i>Hexa</i>       | Hydrolysis of GalNAc units (CS) and GlcNAc units (hyaluronic acid) from sugar chain |
| Mm00599880_m1   | <i>Hexb</i>       | Hydrolysis of GalNAc units (CS) and GlcNAc units (hyaluronic acid) from sugar chain |
| Mm00519485_m1   | <i>Hgsnat</i>     | Acetylation of desulfated GlcNS units (HS)                                          |
| Mm00461768_m1   | <i>Hpse</i>       | Degradation of HS chains extracellularly                                            |
| Mm00477731_m1   | <i>Hyal2</i>      | Degradation of hyaluronic acid chain                                                |
| Mm00662097_m1   | <i>Hyal3</i>      | Degradation of hyaluronic acid chain                                                |
| Mm00494868_m1   | <i>Ids</i>        | Desulfation of 2-O sulfated IdoA and GlcA units (HS and CS)                         |
| Mm00515143_m1   | <i>Idua</i>       | Hydrolysis of IdoA unit from sugar chain (HS and CS)                                |
| Mm00452409_m1   | <i>Mgea5</i>      | Degradation of hyaluronic acid chain                                                |
| Mm00476274_m1   | <i>Naga</i>       | Hydrolysis N-GalNAc moieties from glycoconjugates.                                  |
| Mm00479175_m1   | <i>Naglu</i>      | Hydrolysis of GlcNAc from sugar chain (HS)                                          |
| Mm00480053_m1   | <i>Nat6;Hyal1</i> | Degradation of hyaluronic acid chain                                                |
| Mm00450747_m1   | <i>Sqsh</i>       | Desulfation of GlcNS units (HS)                                                     |



## Growth factors

| Taqman Assay ID | Gene symbol       | Function                                                                        |
|-----------------|-------------------|---------------------------------------------------------------------------------|
| Mm01192933_g1   | <i>Ctgf</i>       | Connective tissue growth factor, embryonic growth factor in skin development ** |
| Mm00433275_m1   | <i>Fgf10</i>      | Fibroblast growth factor 10 **                                                  |
| Mm01285715_m1   | <i>Fgf2</i>       | Fibroblast growth factor 2 **                                                   |
| Mm00438917_m1   | <i>Fgf4 (new)</i> | Growth factor (Uijtdewilligen et al, 2013)**                                    |
| Mm00433291_m1   | <i>Fgf7</i>       | Fibroblast growth factor 7 **                                                   |
| Mm00438921_m1   | <i>Fgf8</i>       | Fibroblast growth factor 8 **                                                   |
| Mm01131929_m1   | <i>Figf</i>       | C-fos induced growth factor **                                                  |
| Mm00439305_g1   | <i>Hbegf</i>      | Heparin-binding epidermal growth factor **                                      |
| Mm01205760_m1   | <i>Pdgfa</i>      | Platelet-derived growth factor a **                                             |
| Mm01298578_m1   | <i>Pdgfb</i>      | Platelet-derived growth factor b **                                             |
| Mm03053266_s1   | <i>Pdgfc</i>      | Platelet-derived growth factor c **                                             |
| Mm00546829_m1   | <i>Pdgfd</i>      | Platelet-derived growth factor d **                                             |
| Mm00436527_m1   | <i>Shh</i>        | Sonic hedgehog **                                                               |
| Mm01178819_m1   | <i>Tgfb1</i>      | Transforming growth factor beta 1 **                                            |
| Mm01321739_m1   | <i>Tgfb2</i>      | Transforming growth factor beta 2 **                                            |
| Mm01307950_m1   | <i>Tgfb3</i>      | Transforming growth factor beta 3 **                                            |
| Mm01281449_m1   | <i>Vegfa</i>      | Vascular endothelial growth factor a **                                         |
| Mm00442102_m1   | <i>Vegfb</i>      | Vascular endothelial growth factor b **                                         |
| Mm01202432_m1   | <i>Vegfc</i>      | Vascular endothelial growth factor c **                                         |

## Putatively involved

| Taqman Assay ID | Gene symbol          | Function                                     |
|-----------------|----------------------|----------------------------------------------|
| Hs99999901_s1   | <i>18S</i>           | Reference gene                               |
| Mm00607939_s1   | <i>Actb (new)</i>    | Reference gene                               |
| Mm00802173_g1   | <i>Arsa</i>          | Desulfation of cerebroside                   |
| Mm00546931_m1   | <i>Arsg</i>          | Paralog of Arsa                              |
| Mm00473986_m1   | <i>C1galt1</i>       | Transferring UDP-Gal to N-GalNAc.            |
| Mm00480676_m1   | <i>C1galt1c1</i>     | C1GALT1-specific chaperone 1                 |
| Mm00517855_m1   | <i>Chst1</i>         | Involved in sulfation of keratin sulfate     |
| Mm03302249_g1   | <i>Gapdh</i>         | Reference gene                               |
| Mm00516323_m1   | <i>Gla</i>           | Hydrolysis of galactose units                |
| Mm00515342_m1   | <i>Glb1</i>          | Hydrolysis of galactose units                |
| Mm00464245_m1   | <i>Glb1l2</i>        | Hydrolysis of galactose units                |
| Mm01254913_g1   | <i>Gnpda1;Gm8615</i> | Conversion of GlcNAc-6-P into fructose-6-P   |
| Mm00503573_m1   | <i>Gnpda2</i>        | Conversion of GlcNAc-6-P into fructose-6-P   |
| Mm01324427_m1   | <i>Hprt1 (new)</i>   | Reference gene                               |
| Mm00502002_m1   | <i>Kl</i>            | Putative glucuronidase                       |
| Mm00473122_m1   | <i>Klb</i>           | Putative glucuronidase                       |
| Mm00555344_m1   | <i>Slc17a5</i>       | Transport of GlcA from lysosoom to cytoplasm |
| Mm00442341_m1   | <i>Slc35a1</i>       | Putative CMP-Sialic Acid Transporter         |
| Mm01277042_m1   | <i>Tbp</i>           | Reference gene                               |
| Mm00495930_m1   | <i>Ugt8a</i>         | Transfere galactose to ceramide              |

Gene symbols marked with new are added in the second version of the TLDA cart.

\* Glc, glucosamine; GlcNAc, N-acetylated glucosamine; Gal, galactosamine; GalNAc, N-acetylated galactosamine; GlcA, glucuronic acid; IdoA, iduronic acid.

\*\*Uijtdewilligen et al, 2016.

### Supplementary data table 3: Differentially expressed genes as % per category

| Category                             | Total genes | Not measured* / Not detected ** | E14vsP90                 |            | E16vsP90                 |            | P1vsP90                  |            |
|--------------------------------------|-------------|---------------------------------|--------------------------|------------|--------------------------|------------|--------------------------|------------|
|                                      |             |                                 | Differentially expressed | Percentage | Differentially expressed | Percentage | Differentially expressed | Percentage |
| <i>Preparation of precursors</i>     | 43          | 8                               | 15                       | 35%        | 6                        | 14%        | 8                        | 19%        |
| <i>Core proteins</i>                 | 14          | 1                               | 11                       | 79%        | 4                        | 29%        | 5                        | 36%        |
| <i>Preparation of linkage region</i> | 8           | 2                               | 3                        | 38%        | 2                        | 25%        | 3                        | 38%        |
| <i>Sugar chain polymerisation</i>    | 13          | 3                               | 7                        | 54%        | 5                        | 38%        | 5                        | 38%        |
| <i>Sugar chain modification</i>      | 32          | 9                               | 14                       | 44%        | 10                       | 31%        | 13                       | 41%        |
| <i>Sugar chain degradation</i>       | 19          | 1                               | 10                       | 53%        | 9                        | 47%        | 5                        | 26%        |
| <i>Growth factors</i>                | 37          | 6                               | 18                       | 49%        | 16                       | 43%        | 16                       | 43%        |
| <i>Putatively involved</i>           | 23          | 5                               | 11                       | 48%        | 10                       | 43%        | 3                        | 13%        |

\* Some genes were not available on the used exon array version.

\*\* Genes, for which a signal was not or only partly detected at a given timepoint or multiple timepoints and therefore a fold change and/or p-value could not be calculated based on the available data, are given as 'not detected'. Gene symbol for which all timepoints were classified as 'not detected' do not show a reference gene due to lack of data for a calculation.

**Supplementary data table 4: Differentially expressed genes during skin development in mice in comparison to mature mouse skin using TLDA cards**

| <b>Production of precursors</b> |                        |                       | <b>E14vsP90</b> |                                 | <b>E16vsP90</b> |                                 | <b>P1vsP90</b> |                                 | <b>Function</b>                                                          |
|---------------------------------|------------------------|-----------------------|-----------------|---------------------------------|-----------------|---------------------------------|----------------|---------------------------------|--------------------------------------------------------------------------|
| <b>Gene symbol</b>              | <b>Taqman assay ID</b> | <b>Reference gene</b> | <b>P-value</b>  | <b>Relative fold expression</b> | <b>P-value</b>  | <b>Relative fold expression</b> | <b>P-value</b> | <b>Relative fold expression</b> |                                                                          |
| <i>Adpgk</i>                    | Mm00511302_m1          | <i>Tbp</i>            | 0.915           | 1.033                           | 0.316           | 1.410                           | 0.144          | 1.620                           | Phosphorylation of glucose into glucose-6-P                              |
| <i>Gale</i>                     | Mm00617772_g1          | <i>Tbp</i>            | 0.921           | 1.004                           | 0.822           | 0.906                           | 0.002          | 0.628                           | Conversion of UDP-GlcNAc to UDP-GalNAc                                   |
| <i>Galk1</i>                    | Mm00444182_m1          | <i>Tbp</i>            | 0.029           | 5.897                           | 0.057           | 3.867                           | 0.074          | 3.043                           | Phosphorylation of Galactose into Galactose-1-P                          |
| <i>Galk2</i>                    | Mm00613268_m1          | <i>Tbp</i>            | 0.710           | 1.123                           | 0.682           | 1.109                           | 0.364          | 1.237                           | Phosphorylation of N-Acetylgalactosamine (GalNAc) into GalNAc-1P)        |
| <i>Galt</i>                     | Mm00489459_g1          | <i>Tbp</i>            | 0.042           | 0.573                           | 0.027           | 0.497                           | 0.832          | 0.964                           | UDP-activation of Glucose-1-P and Galactose-1-P                          |
| <i>Gck</i>                      | Mm00439129_m1          |                       | Not detected    |                                 | Not detected    |                                 | Not detected   |                                 | Phosphorylation of glucose into glucose-6-P                              |
| <i>Gfpt1</i>                    | Mm00600127_m1          | <i>Tbp</i>            | 0.002           | 2.378                           | 0.160           | 1.273                           | 0.282          | 1.481                           | Conversion of fructose-6-P into glucosamine-6-P (Glc-6-P)                |
| <i>Gfpt2</i>                    | Mm00496565_m1          | <i>Tbp</i>            | 0.269           | 0.772                           | 0.079           | 0.494                           | 0.356          | 0.780                           | Conversion of fructose-6-P into Glc-6-P                                  |
| <i>Gnpnat1</i>                  | Mm00834602_mH          | <i>Tbp</i>            | 0.306           | 0.890                           | 0.221           | 0.652                           | 0.369          | 0.900                           | Conversion of Glc-6-P into N-Acetylglucosamine-6-P (GlcNAc-6-P)          |
| <i>Gpi1</i>                     | Mm02026122_g1          | <i>Gapdh</i>          | 0.035           | 1.336                           | 0.742           | 0.906                           | 0.195          | 1.193                           | Isomerisation of glucose-6-P into fructose-6-P                           |
| <i>Hk1</i>                      | Mm00439344_m1          | <i>Tbp</i>            | 0.196           | 1.163                           | 0.598           | 0.837                           | 0.447          | 0.741                           | Phosphorylation of glucose into glucose-6-P                              |
| <i>Hk2</i>                      | Mm00443385_m1          | <i>Tbp</i>            | 0.027           | 0.652                           | 0.253           | 1.390                           | 0.586          | 0.904                           | Phosphorylation of glucose into glucose-6-P                              |
| <i>Miox</i>                     | Mm00480214_m1          |                       | Not detected    |                                 | Not detected    |                                 | Not detected   |                                 | Conversion of Myo-inositol into UDP-GlcA                                 |
| <i>Nagk</i>                     | Mm00479878_m1          | <i>Tbp</i>            | 0.139           | 1.277                           | 0.620           | 1.112                           | 0.200          | 1.157                           | Phosphorylation of GlcNAc to GlcNAc-6-P                                  |
| <i>Papss1</i>                   | Mm00442283_m1          | <i>Tbp</i>            | 0.037           | 1.472                           | 0.907           | 1.045                           | 0.400          | 1.304                           | Synthesis of PAPS complex                                                |
| <i>Papss2</i>                   | Mm00442295_m1          | <i>Tbp</i>            | 0.015           | 1.993                           | 0.383           | 1.380                           | 0.283          | 1.453                           | Synthesis of PAPS complex                                                |
| <i>Pgm1</i>                     | Mm00804141_m1          | <i>Tbp</i>            | 0.100           | 0.582                           | 0.194           | 0.702                           | 0.185          | 0.717                           | Conversion of glucose-6-P into glucose-1-P                               |
| <i>Pgm2</i>                     | Mm00728285_s1          | <i>Tbp</i>            | 0.238           | 0.721                           | 0.940           | 1.022                           | 0.475          | 1.161                           | Conversion of glucose-6-P into glucose-1-P                               |
| <i>Pgm3</i>                     | Mm00459270_m1          | <i>Tbp</i>            | 0.058           | 1.876                           | 0.296           | 1.249                           | 0.098          | 1.470                           | Conversion of GlcNAc-6-P into GlcNAc-1-P                                 |
| <i>Pgm5</i>                     | Mm00723432_m1          | <i>Tbp</i>            | 0.002           | 4.053                           | 0.033           | 2.792                           | 0.019          | 2.515                           | Conversion of glucose-6-P into glucose-1-P                               |
| <i>Slc13a1</i>                  | Mm00490339_m1          |                       | Not detected    |                                 | Not detected    |                                 | Not detected   |                                 | Transport of sulphate from the extracellular space to cytoplasm          |
| <i>Slc13a4</i>                  | Mm00556495_m1          | <i>Tbp</i>            | 0.007           | 11.752                          | Not detected    | Not detected                    | Not detected   | Not detected                    | Transport of sulphate from the extracellular space to cytoplasm          |
| <i>Slc13a5</i>                  | Mm01334459_m1          |                       | Not detected    |                                 | Not detected    |                                 | Not detected   |                                 | Transport of sulphate from the extracellular space to cytoplasm          |
| <i>Slc26a11</i>                 | Mm00626632_m1          | <i>Tbp</i>            | 0.190           | 0.860                           | 0.513           | 1.160                           | 0.028          | 1.905                           | Transport of sulphate from the extracellular space to cytoplasm          |
| <i>Slc26a2</i>                  | Mm00432896_m1          |                       | Not detected    |                                 | Not detected    |                                 | Not detected   |                                 | Transport of sulphate from the extracellular space to cytoplasm          |
| <i>Slc26a6</i>                  | Mm00506742_m1          | <i>Tbp</i>            | 0.412           | 1.221                           | 0.291           | 0.656                           | 0.733          | 1.082                           | Transport of sulphate from the extracellular space to cytoplasm          |
| <i>Slc26a7</i>                  | Mm00524162_m1          | <i>Tbp</i>            | 0.546           | 0.824                           | 0.838           | 0.969                           | 0.184          | 1.655                           | Transport of sulphate from the extracellular space to cytoplasm          |
| <i>Slc26a8</i>                  | Mm00524836_m1          |                       | Not detected    |                                 | Not detected    |                                 | Not detected   |                                 | Transport of sulphate from the extracellular space to cytoplasm          |
| <i>Slc26a9</i>                  | Mm00628490_m1          | <i>Tbp</i>            | Not detected    |                                 | 0.036           | 0.264                           | 0.023          | 0.318                           | Transport of sulphate from the extracellular space to cytoplasm          |
| <i>Slc35a2</i>                  | Mm00446504_m1          | <i>Tbp</i>            | 0.016           | 1.577                           | 0.311           | 1.287                           | 0.678          | 1.142                           | Transport from cytoplasm to Golgi system of UDP-GalNAc and UDP-Galactose |
| <i>Slc35a3</i>                  | Mm00523288_m1          | <i>Tbp</i>            | 0.008           | 0.444                           | 0.060           | 0.567                           | 0.455          | 0.811                           | Transport from cytoplasm to Golgi system of UDP-GlcNAc                   |
| <i>Slc35a4</i>                  | Mm00782997_s1          | <i>Tbp</i>            | 0.222           | 1.374                           | 0.244           | 1.347                           | 0.147          | 1.604                           | Transport from cytoplasm to Golgi system of UDP-GalNAc and UDP-Galactose |
| <i>Slc35b1</i>                  | Mm00450258_m1          | <i>Tbp</i>            | 0.882           | 0.965                           | 0.606           | 0.875                           | 0.748          | 1.080                           | Transport from cytoplasm to Golgi system of UDP-GalNAc and UDP-Galactose |
| <i>Slc35b2</i>                  | Mm01269910_m1          | <i>Tbp</i>            | 0.000           | 1.889                           | 0.196           | 1.436                           | 0.075          | 1.663                           | Transport of PAPS complex from cytoplasm to Golgi system                 |
| <i>Slc35b3</i>                  | Mm00506275_m1          | <i>Tbp</i>            | 0.832           | 0.947                           | 0.251           | 1.097                           | 0.293          | 1.258                           | Transport of PAPS complex from cytoplasm to Golgi system                 |
| <i>Slc35b4</i>                  | Mm00480588_m1          | <i>Tbp</i>            | 0.019           | 1.443                           | 0.467           | 0.824                           | 0.574          | 1.233                           | Transport from cytoplasm to Golgi system of UDP-GlcNAc and UDP-Xylose    |
| <i>Slc35d1</i>                  | Mm00624959_m1          | <i>Tbp</i>            | 0.186           | 1.260                           | 0.674           | 0.924                           | 0.348          | 1.176                           | Transport from cytoplasm to Golgi system of UDP-GalNAc and UDP-GlcA      |
| <i>Slc35d2</i>                  | Mm01304830_m1          |                       | Not detected    |                                 | Not detected    |                                 | Not detected   |                                 | Transport from cytoplasm to Golgi system of UDP-GlcNAc                   |
| <i>Slc35d3</i>                  | Mm01717003_m1          |                       | Not detected    |                                 | Not detected    |                                 | Not detected   |                                 | Paralog of Slc35d1                                                       |
| <i>Uap1</i>                     | Mm00505476_m1          | <i>Tbp</i>            | 0.185           | 1.324                           | 0.557           | 1.149                           | 0.081          | 1.635                           | UDP-activation of GlcNAc-1-P and GalNAc-1-P                              |
| <i>Ugdh</i>                     | Mm00447643_m1          | <i>Tbp</i>            | 0.170           | 1.316                           | 0.778           | 0.957                           | 0.401          | 1.295                           | Conversion of UDP-glucose into UDP-glucuronic acid (UDP-GlcA)            |
| <i>Ugp2</i>                     | Mm00454826_m1          | <i>Tbp</i>            | 0.163           | 0.659                           | 0.780           | 1.059                           | 0.233          | 1.350                           | UDP-activation of Glucose-1-P                                            |
| <i>Uxs1</i>                     | Mm00550735_m1          | <i>Tbp</i>            | 0.771           | 1.052                           | 0.843           | 1.036                           | 0.462          | 1.226                           | Conversion of UDP-GlcA into UDP-xylose                                   |

## Core proteins

| Gene symbol    | Taqman assay ID | Reference gene | E14vsP90     |                          | E16vsP90     |                          | P1vsP90      |                          | Function                                                        |
|----------------|-----------------|----------------|--------------|--------------------------|--------------|--------------------------|--------------|--------------------------|-----------------------------------------------------------------|
|                |                 |                | P-value      | Relative fold expression | P-value      | Relative fold expression | P-value      | Relative fold expression |                                                                 |
| <i>Agrn</i>    | Mm01545840_m1   | <i>Tbp</i>     | 0.042        | 1.517                    | 0.710        | 1.100                    | 0.208        | 1.295                    | Proteoglycan carrying HS present in ECM                         |
| <i>Cd44</i>    | Mm01277164_m1   | <i>Gapdh</i>   | 0.018        | 0.536                    | 0.171        | 0.637                    | 0.223        | 1.385                    | Proteoglycan carrying HS and hyaluronic acid on cell surface    |
| <i>Col18a1</i> | Mm00487131_m1   | <i>Tbp</i>     | 0.498        | 1.152                    | 0.958        | 1.011                    | 0.532        | 1.199                    | Proteoglycan carrying HS present in basement membrane           |
| <i>Gpc1</i>    | Mm00497305_m1   | <i>Tbp</i>     | 0.027        | 1.500                    | 0.172        | 1.164                    | 0.013        | 1.721                    | Proteoglycan carrying HS present on cell surface via GPI-anchor |
| <i>Gpc2</i>    | Mm00549650_m1   | <i>Tbp</i>     | 0.005        | 11.686                   | 0.638        | 1.294                    | 0.369        | 1.249                    | Proteoglycan carrying HS present on cell surface via GPI-anchor |
| <i>Gpc3</i>    | Mm00516722_m1   | <i>Gapdh</i>   | 0.000        | 6.765                    | 0.019        | 3.734                    | 0.013        | 8.044                    | Proteoglycan carrying HS present on cell surface via GPI-anchor |
| <i>Gpc4</i>    | Mm00515035_m1   | <i>Tbp</i>     | 0.033        | 1.339                    | 0.799        | 1.041                    | 0.185        | 1.707                    | Proteoglycan carrying HS present on cell surface via GPI-anchor |
| <i>Gpc5</i>    | Mm00615599_m1   |                | Not detected |                          | Not detected |                          | Not detected |                          | Proteoglycan carrying HS present on cell surface via GPI-anchor |
| <i>Gpc6</i>    | Mm00516235_m1   | <i>Tbp</i>     | 0.027        | 2.880                    | 0.275        | 1.376                    | 0.130        | 1.926                    | Proteoglycan carrying HS present on cell surface via GPI-anchor |
| <i>Hspg2</i>   | Mm01181179_g1   | <i>Tbp</i>     | 0.030        | 1.504                    | 0.064        | 1.959                    | 0.007        | 3.325                    | Proteoglycan carrying HS present in ECM                         |
| <i>Sdc1</i>    | Mm00448918_m1   | <i>Tbp</i>     | 0.012        | 0.293                    | 0.107        | 0.313                    | 0.069        | 0.403                    | Proteoglycan carrying HS present on cell surface                |
| <i>Sdc2</i>    | Mm00484718_m1   | <i>Tbp</i>     | 0.078        | 1.281                    | 0.159        | 0.739                    | 0.554        | 1.204                    | Proteoglycan carrying HS present on cell surface                |
| <i>Sdc3</i>    | Mm01179831_m1   | <i>Tbp</i>     | 0.210        | 1.333                    | 0.051        | 0.523                    | 0.590        | 0.863                    | Proteoglycan carrying HS present on cell surface                |
| <i>Sdc4</i>    | Mm00488527_m1   | <i>Gapdh</i>   | 0.002        | 0.201                    | 0.039        | 0.240                    | 0.065        | 0.471                    | Proteoglycan carrying HS present on cell surface                |

## Preparation of linkage region

| Gene symbol    | Taqman assay ID | Reference gene | E14vsP90     |                          | E16vsP90     |                          | P1vsP90      |                          | Function                                                            |
|----------------|-----------------|----------------|--------------|--------------------------|--------------|--------------------------|--------------|--------------------------|---------------------------------------------------------------------|
|                |                 |                | P-value      | Relative fold expression | P-value      | Relative fold expression | P-value      | Relative fold expression |                                                                     |
| <i>B3galt6</i> | Mm00504458_s1   | <i>Tbp</i>     | 0.917        | 1.018                    | 0.822        | 1.054                    | 0.171        | 1.360                    | Transferring UDP-galactose to galactose-xylose on proteoglycan      |
| <i>B3gat1</i>  | Mm00661499_m1   |                | Not detected |                          | Not detected |                          | Not detected |                          | Transferring UDP-GlcA to galactose-galactose-xylose on proteoglycan |
| <i>B3gat2</i>  | Mm00549042_m1   |                | Not detected |                          | Not detected |                          | Not detected |                          | Transferring UDP-GlcA to galactose-galactose-xylose on proteoglycan |
| <i>B3gat3</i>  | Mm00470389_m1   | <i>Tbp</i>     | 0.140        | 1.254                    | 0.438        | 1.099                    | 0.199        | 1.223                    | Transferring UDP-GlcA to galactose-galactose-xylose on proteoglycan |
| <i>B4galt2</i> | Mm00479556_m1   | <i>Tbp</i>     | 0.023        | 4.562                    | 0.059        | 2.679                    | 0.038        | 3.384                    | Transferring UDP-galactose to GlcNAc, Glc, and Xyl.                 |
| <i>B4galt7</i> | Mm00461357_m1   | <i>Tbp</i>     | 0.013        | 1.824                    | 0.394        | 1.144                    | 0.078        | 1.469                    | Transferring UDP-galactose to xylose on proteoglycan                |
| <i>Xylt1</i>   | Mm00558690_m1   | <i>Tbp</i>     | 0.113        | 1.258                    | 0.020        | 0.614                    | 0.114        | 1.391                    | Transferring UDP-xylose to proteoglycan                             |
| <i>Xylt2</i>   | Mm00461181_m1   | <i>Tbp</i>     | 0.017        | 1.209                    | 0.882        | 0.983                    | 0.054        | 1.587                    | Transferring UDP-xylose to proteoglycan                             |

## GAG chain polymerisation

| Gene symbol       | Taqman assay ID | Reference gene | E14vsP90     |                          | E16vsP90     |                          | P1vsP90      |                          | Function                                                   |
|-------------------|-----------------|----------------|--------------|--------------------------|--------------|--------------------------|--------------|--------------------------|------------------------------------------------------------|
|                   |                 |                | P-value      | Relative fold expression | P-value      | Relative fold expression | P-value      | Relative fold expression |                                                            |
| <i>Chpf</i>       | Mm01262239_g1   | <i>Tbp</i>     | 0.000        | 2.991                    | 0.059        | 1.865                    | 0.050        | 2.401                    | Transferring UDP-GlcA to GalNAc at end of sugar chain (CS) |
| <i>Chsy1</i>      | Mm01319178_m1   | <i>Tbp</i>     | 0.013        | 3.900                    | 0.024        | 2.282                    | 0.072        | 2.229                    | Transferring UDP-GlcA to GalNAc at end of sugar chain (CS) |
| <i>Chsy3</i>      | Mm01545329_m1   | <i>Tbp</i>     | 0.026        | 4.006                    | 0.075        | 2.184                    | 0.101        | 2.013                    | Transferring UDP-GlcA to GalNAc at end of sugar chain (CS) |
| <i>Csgalnact1</i> | Mm00555164_m1   | <i>Tbp</i>     | 0.099        | 0.496                    | 0.098        | 0.475                    | 0.634        | 1.128                    | Transferring UDP-GalNAc to GlcA at end of sugar chain (CS) |
| <i>Csgalnact2</i> | Mm00513340_m1   | <i>Tbp</i>     | 0.063        | 0.599                    | 0.490        | 0.886                    | 0.033        | 1.382                    | Transferring UDP-GalNAc to GlcA at end of sugar chain (CS) |
| <i>Ext1</i>       | Mm00468769_m1   | <i>Tbp</i>     | 0.491        | 1.076                    | 0.897        | 1.013                    | 0.236        | 1.180                    | Transferring UDP-GlcNAc to GlcA at end of sugar chain (HS) |
| <i>Ext2</i>       | Mm00468775_m1   |                | Not detected |                          | Not detected |                          | Not detected |                          | Transferring UDP-GlcNAc to GlcA at end of sugar chain (HS) |
| <i>Extl1</i>      | Mm00621977_s1   | <i>Tbp</i>     | Not detected |                          | Not detected |                          | Not detected |                          | Transferring UDP-GlcA to GlcNAc at end of sugar chain (HS) |
| <i>Extl2</i>      | Mm00469621_m1   | <i>Tbp</i>     | 0.007        | 2.043                    | 0.660        | 1.220                    | 0.106        | 1.765                    | Transferring UDP-GlcA to GlcNAc at end of sugar chain (HS) |
| <i>Extl3</i>      | Mm00516994_m1   | <i>Tbp</i>     | 0.042        | 1.154                    | 0.746        | 0.982                    | 0.047        | 1.488                    | Transferring UDP-GlcA to GlcNAc at end of sugar chain (HS) |
| <i>Has1</i>       | Mm00468496_m1   | <i>Tbp</i>     | Not detected |                          | 0.071        | 1.920                    | 0.076        | 1.892                    | Polymerisation of hyaluronic acid                          |
| <i>Has2</i>       | Mm00515089_m1   | <i>Tbp</i>     | 0.188        | 1.933                    | 0.235        | 1.705                    | 0.410        | 1.577                    | Polymerisation of hyaluronic acid                          |
| <i>Has3</i>       | Mm00515091_m1   |                | Not detected |                          | Not detected |                          | Not detected |                          | Polymerisation of hyaluronic acid                          |

# GAG chain modification

| Gene symbol     | Taqman assay ID | Reference gene | E14vsP90     |                          | E16vsP90     |                          | P1vsP90      |                          | Function                                                                                  |
|-----------------|-----------------|----------------|--------------|--------------------------|--------------|--------------------------|--------------|--------------------------|-------------------------------------------------------------------------------------------|
|                 |                 |                | P-value      | Relative fold expression | P-value      | Relative fold expression | P-value      | Relative fold expression |                                                                                           |
| <i>Chst11</i>   | Mm00517563_m1   | <i>Tbp</i>     | 0.002        | 3.000                    | 0.087        | 1.195                    | 0.087        | 1.957                    | Sulfation at the 4-O position of GalNAc untis (CS)                                        |
| <i>Chst12</i>   | Mm00546416_s1   | <i>Tbp</i>     | 0.168        | 0.806                    | 0.698        | 0.936                    | 0.270        | 1.433                    | Sulfation at the 4-O position of GalNAc untis (CS)                                        |
| <i>Chst13</i>   | Mm01186255_s1   | <i>Tbp</i>     | 0.371        | 0.490                    | Not detected |                          | Not detected |                          | Sulfation at the 4-O position of GalNAc untis (CS)                                        |
| <i>Chst14</i>   | Mm00511291_s1   | <i>Tbp</i>     | 0.026        | 2.459                    | 0.156        | 1.513                    | 0.203        | 1.707                    | Sulfation at the 4-O position of GalNAc untis (CS)                                        |
| <i>Chst15</i>   | Mm00513227_m1   | <i>Tbp</i>     | 0.007        | 1.850                    | 0.016        | 1.724                    | 0.005        | 1.512                    | Sulfation at the 6-O position of GalNAc untis (CS)                                        |
| <i>Chst2</i>    | Mm00490018_g1   | <i>Tbp</i>     | 0.014        | 3.664                    | 0.010        | 3.145                    | 0.006        | 2.773                    | Sulfation at the 6-O position of GalNAc untis (CS)                                        |
| <i>Chst3</i>    | Mm00489736_m1   | <i>Tbp</i>     | 0.041        | 3.241                    | 0.152        | 1.941                    | 0.028        | 3.550                    | Sulfation at the 6-O position of GalNAc untis (CS)                                        |
| <i>Chst4</i>    | Mm00488783_s1   |                | Not detected |                          | Not detected |                          | Not detected |                          | Sulfation at the 6-O position of GalNAc untis (CS)                                        |
| <i>Chst5</i>    | Mm00517342_m1   |                | Not detected |                          | Not detected |                          | Not detected |                          | Sulfation at the 6-O position of GalNAc untis (CS)                                        |
| <i>Chst7</i>    | Mm00491466_m1   | <i>Tbp</i>     | 0.777        | 1.107                    | 0.381        | 1.420                    | Not detected |                          | Sulfation at the 6-O position of GalNAc untis (CS)                                        |
| <i>Chst8</i>    | Mm00558321_m1   | <i>Tbp</i>     | 0.089        | 2.587                    | 0.221        | 0.591                    | 0.139        | 2.280                    | Sulfation at the 4-O position of GalNAc untis (CS)                                        |
| <i>Chst9</i>    | Mm01722279_m1   |                | Not detected |                          | Not detected |                          | Not detected |                          | Sulfation at the 4-O position of GalNAc untis (CS)                                        |
| <i>Dse</i>      | Mm00552923_m1   | <i>Tbp</i>     | 0.275        | 1.092                    | 0.197        | 0.838                    | 0.723        | 1.076                    | Epimerisation of GlcA unit into iduronic acid unit (IdoA) (CS)                            |
| <i>Glce</i>     | Mm00473667_m1   | <i>Tbp</i>     | 0.146        | 1.381                    | 0.636        | 0.918                    | 0.094        | 1.632                    | Epimerisation of GlcA unit into iduronic acid unit (IdoA) (HS)                            |
| <i>Hs2st1</i>   | Mm00478684_m1   | <i>Tbp</i>     | 0.120        | 1.335                    | 0.780        | 1.071                    | 0.179        | 1.633                    | Sulfation at the 2-O position of GlcA and IdoA units (HS)                                 |
| <i>Hs3st1</i>   | Mm01964038_s1   | <i>Tbp</i>     | 0.051        | 1.796                    | 0.039        | 1.937                    | 0.027        | 2.809                    | Sulfation at the 3-O position of GlcNAc and GlcNS units sulfated at the 6-O position (HS) |
| <i>Hs3st2</i>   | Mm00616933_m1   |                | Not detected |                          | Not detected |                          | Not detected |                          | Sulfation at the 3-O position of GlcNAc and GlcNS units sulfated at the 6-O position (HS) |
| <i>Hs3st3a1</i> | Mm00780907_s1   |                | Not detected |                          | Not detected |                          | Not detected |                          | Sulfation at the 3-O position of GlcNAc and GlcNS units sulfated at the 6-O position (HS) |
| <i>Hs3st3b1</i> | Mm00479621_m1   | <i>Tbp</i>     | 0.004        | 3.204                    | 0.028        | 2.511                    | 0.002        | 2.629                    | Sulfation at the 3-O position of GlcNAc and GlcNS units sulfated at the 6-O position (HS) |
| <i>Hs3st6</i>   | Mm01299930_m1   | <i>Tbp</i>     | 0.006        | 0.208                    | 0.089        | 0.664                    | 0.041        | 1.765                    | Sulfation at the 3-O position of GlcNAc and GlcNS units sulfated at the 6-O position (HS) |
| <i>Hs6st1</i>   | Mm01229698_s1   | <i>Tbp</i>     | 0.437        | 1.180                    | 0.670        | 1.068                    | 0.110        | 1.570                    | Sulfation at the 6-O position of GlcNAc and N-sulfated-glucuronic acid units (GlcNS) (HS) |
| <i>Hs6st2</i>   | Mm00479296_m1   |                | Not detected |                          | Not detected |                          | Not detected |                          | Sulfation at the 6-O position of GlcNAc and GlcNS units (HS)                              |
| <i>Hs6st3</i>   | Mm00479297_m1   |                | Not detected |                          | Not detected |                          | Not detected |                          | Sulfation at the 6-O position of GlcNAc and GlcNS units (HS)                              |
| <i>Ndst1</i>    | Mm00447005_m1   | <i>Tbp</i>     | 0.118        | 1.487                    | 0.140        | 1.449                    | 0.054        | 2.202                    | N-de-acetylation and N-sulfation of GlcNAc unit (HS)                                      |
| <i>Ndst2</i>    | Mm00447818_m1   | <i>Tbp</i>     | 0.008        | 1.347                    | 0.001        | 2.017                    | 0.002        | 2.021                    | N-de-acetylation and N-sulfation of GlcNAc unit (HS)                                      |
| <i>Ndst3</i>    | Mm00453178_m1   | <i>Tbp</i>     | 0.004        | 4.708                    | 0.041        | 7.910                    | 0.004        | 12.034                   | N-de-acetylation and N-sulfation of GlcNAc unit (HS)                                      |
| <i>Ndst4</i>    | Mm00480767_m1   | <i>Tbp</i>     | Not detected |                          | Not detected |                          | Not detected |                          | N-de-acetylation and N-sulfation of GlcNAc unit (HS)                                      |
| <i>Sulf1</i>    | Mm00552283_m1   | <i>Tbp</i>     | 0.004        | 4.644                    | 0.079        | 2.674                    | 0.089        | 2.077                    | Desulfation of the 6-O position of 6-O sulfated GlcNAc and GlcNS units (HS)               |
| <i>Sulf2</i>    | Mm00511193_m1   |                | Not detected |                          | Not detected |                          | Not detected |                          | Desulfation of the 6-O position of 6-O sulfated GlcNAc and GlcNS units (HS)               |
| <i>Sumf1</i>    | Mm00461213_m1   | <i>Tbp</i>     | 0.021        | 0.784                    | 0.023        | 0.573                    | 0.960        | 0.987                    | Cofactor for Sulf1 and Sulf 2 (HS)                                                        |
| <i>Sumf2</i>    | Mm01197721_m1   | <i>Tbp</i>     | 0.008        | 2.657                    | 0.104        | 2.023                    | 0.038        | 1.857                    | Cofactor for Sulf1 and Sulf 2 (HS)                                                        |
| <i>Ust</i>      | Mm00616790_m1   | <i>Tbp</i>     | 0.359        | 0.940                    | 0.864        | 1.021                    | 0.106        | 1.109                    | Sulfation at the 2-O position of GlcA and IdoA units (CS)                                 |

**GAG chain degradation**

| Gene symbol   | Taqman assay ID | Reference gene | E14vsP90     |                          | E16vsP90     |                          | P1vsP90      |                          | Function                                                                            |
|---------------|-----------------|----------------|--------------|--------------------------|--------------|--------------------------|--------------|--------------------------|-------------------------------------------------------------------------------------|
|               |                 |                | P-value      | Relative fold expression | P-value      | Relative fold expression | P-value      | Relative fold expression |                                                                                     |
| <i>Arsb</i>   | Mm00802167_m1   | <i>Tbp</i>     | 0.049        | 1.403                    | 0.745        | 0.944                    | 0.979        | 0.987                    | Desulfation of the 4-O position of 4-O sulfated GalNAc units (CS)                   |
| <i>Arsj</i>   | Mm00557970_m1   | <i>Tbp</i>     | 0.013        | 7.805                    | 0.010        | 12.075                   | 0.014        | 7.146                    | Desulfation of the 4-O position of 4-O sulfated GalNAc units (CS)                   |
| <i>Arsk</i>   | Mm00513099_m1   | <i>Tbp</i>     | 0.306        | 0.801                    | 0.059        | 0.466                    | 0.143        | 0.678                    | Desulfation of proteoglycans, paralog of IDS                                        |
| <i>Galns</i>  | Mm00489575_m1   | <i>Tbp</i>     | 0.000        | 2.648                    | 0.066        | 1.674                    | 0.091        | 1.584                    | Desulfation of the 6-O position of 6-O sulfated GalNAc units (CS)                   |
| <i>Gns</i>    | Mm00659592_m1   | <i>Tbp</i>     | 0.103        | 0.540                    | 0.153        | 0.532                    | 0.668        | 0.842                    | Desulfation of the 6-O position of 6-O sulfated GlcNAc and GlcNS units (HS)         |
| <i>Gusb</i>   | Mm00446954_g1   | <i>Tbp</i>     | 0.057        | 1.145                    | 0.592        | 0.909                    | 0.549        | 1.182                    | Hydrolysis of GlcA from sugar chain (HS and Hyaluronic acid and CS)                 |
| <i>Hexa</i>   | Mm00599877_m1   | <i>Tbp</i>     | 0.104        | 0.552                    | 0.140        | 0.568                    | 0.261        | 0.735                    | Hydrolysis of GalNAc units (CS) and GlcNAc units (hyaluronic acid) from sugar chain |
| <i>Hexb</i>   | Mm00599880_m1   | <i>Tbp</i>     | 0.010        | 0.540                    | 0.039        | 0.705                    | 0.015        | 0.616                    | Hydrolysis of GalNAc units (CS) and GlcNAc units (hyaluronic acid) from sugar chain |
| <i>Hgsnat</i> | Mm00519485_m1   | <i>Tbp</i>     | 0.135        | 0.792                    | 0.456        | 0.880                    | 0.004        | 1.851                    | Acetylation of desulfated GlcNS units (HS)                                          |
| <i>Hpse</i>   | Mm00461768_m1   | <i>Tbp</i>     | 0.044        | 0.304                    | 0.342        | 1.450                    | 0.169        | 0.578                    | Degradation of HS chains extracellularly                                            |
| <i>Hyal1</i>  | Mm00476206_m1   | <i>Tbp</i>     | 0.001        | 0.198                    | 0.008        | 0.288                    | 0.006        | 0.607                    | Degradation of hyaluronic acid chain                                                |
| <i>Hyal2</i>  | Mm00477731_m1   | <i>Tbp</i>     | Not detected |                          | 0.692        | 1.129                    | 0.436        | 1.332                    | Degradation of hyaluronic acid chain                                                |
| <i>Hyal3</i>  | Mm00662097_m1   |                | Not detected |                          | Not detected |                          | Not detected |                          | Degradation of hyaluronic acid chain                                                |
| <i>Ids</i>    | Mm00494868_m1   | <i>Tbp</i>     | 0.035        | 0.722                    | 0.031        | 0.612                    | 0.517        | 0.871                    | Desulfation of 2-O sulfated IdoA and GlcA units (HS and CS)                         |
| <i>Idua</i>   | Mm00515143_m1   | <i>Tbp</i>     | 0.509        | 0.887                    | 0.092        | 0.646                    | 0.773        | 1.093                    | Hydrolysis of IdoA unit from sugar chain (HS and CS)                                |
| <i>Mgea5</i>  | Mm00452409_m1   | <i>Tbp</i>     | 0.113        | 1.074                    | 0.054        | 0.824                    | 0.122        | 1.077                    | Degradation of hyaluronic acid chain                                                |
| <i>Naga</i>   | Mm00476274_m1   | <i>Tbp</i>     | 0.069        | 0.703                    | 0.175        | 0.744                    | 0.408        | 1.205                    | Hydrolysis N-GalNAc moieties from glycoconjugates.                                  |
| <i>Naglu</i>  | Mm00479175_m1   | <i>Tbp</i>     | 0.130        | 0.746                    | 0.105        | 0.583                    | 0.758        | 0.898                    | Hydrolysis of GlcNAc from sugar chain (HS)                                          |
| <i>Sgsh</i>   | Mm00450747_m1   | <i>Tbp</i>     | 0.055        | 0.647                    | 0.002        | 0.435                    | 0.644        | 0.897                    | Desulfation of GlcNS units (HS)                                                     |

# Growth factors

| Gene symbol   | Taqman assay ID | Reference gene | E14vsP90     |                          | E16vsP90     |                          | P1vsP90      |                          | Function                                                                        |
|---------------|-----------------|----------------|--------------|--------------------------|--------------|--------------------------|--------------|--------------------------|---------------------------------------------------------------------------------|
|               |                 |                | P-value      | Relative fold expression | P-value      | Relative fold expression | P-value      | Relative fold expression |                                                                                 |
| <i>Areg</i>   | Mm00437583_m1   |                | Not detected |                          | Not detected |                          | 0.656        | 0.834                    | Amphiregulin **                                                                 |
| <i>Bmp3</i>   | Mm00557790_m1   | <i>Tbp</i>     | 0.007        | 4.270                    | 0.004        | 7.240                    | 0.002        | 11.628                   | Bone morphogenetic growth factor 3 **                                           |
| <i>Bmp5</i>   | Mm00432091_m1   | <i>Tbp</i>     | 0.022        | 12.051                   | 0.303        | 1.788                    | 0.587        | 1.300                    | Bone morphogenetic growth factor 5 **                                           |
| <i>Ctgf</i>   | Mm01192931_g1   | <i>Tbp</i>     | 0.668        | 1.079                    | 0.011        | 0.232                    | 0.076        | 0.580                    | Connective tissue growth factor, embryonic growth factor in skin development ** |
| <i>Fgf10</i>  | Mm00433275_m1   | <i>Tbp</i>     | 0.063        | 1.649                    | 0.050        | 1.801                    | 0.093        | 2.262                    | Fibroblast growth factor 10 **                                                  |
| <i>Fgf13</i>  | Mm00438910_m1   | <i>Tbp</i>     | 0.002        | 3.205                    | 0.059        | 1.750                    | 0.181        | 1.544                    | Fibroblast growth factor 13 **                                                  |
| <i>Fgf2</i>   | Mm01285715_m1   | <i>Tbp</i>     | 0.277        | 0.651                    | 0.166        | 0.539                    | 0.382        | 1.446                    | Fibroblast growth factor 2 **                                                   |
| <i>Fgf20</i>  | Mm00748347_m1   |                | Not detected |                          | Not detected |                          | Not detected |                          | Fibroblast growth factor 20 **                                                  |
| <i>Fgf22</i>  | Mm00445749_m1   | <i>Tbp</i>     | Not detected |                          | 0.386        | 0.632                    | 0.060        | 0.614                    | Fibroblast growth factor 22 **                                                  |
| <i>Fgf7</i>   | Mm00433291_m1   | <i>Tbp</i>     | 0.045        | 0.606                    | 0.002        | 0.394                    | 0.087        | 0.630                    | Fibroblast growth factor 7 **                                                   |
| <i>Fgf8</i>   | Mm00438921_m1   |                | Not detected |                          | Not detected |                          | Not detected |                          | Fibroblast growth factor 8 **                                                   |
| <i>Figf</i>   | Mm01131929_m1   | <i>Tbp</i>     | 0.081        | 1.397                    | 0.030        | 1.787                    | 0.545        | 0.834                    | C-fos induced growth factor **                                                  |
| <i>Gdf10</i>  | Mm03024279_s1   | <i>Tbp</i>     | 0.015        | 3.181                    | 0.454        | 1.143                    | 0.166        | 1.519                    | Growth differentiation factor 10 **                                             |
| <i>Hbegf</i>  | Mm00439305_g1   | <i>Tbp</i>     | Not detected |                          | 0.015        | 0.347                    | 0.016        | 0.423                    | Heparin-binding epidermal growth factor **                                      |
| <i>Hdgf</i>   | Mm00725733_s1   | <i>Gapdh</i>   | 0.257        | 1.221                    | 0.737        | 0.911                    | 0.975        | 1.008                    | Hepatoma-derived growth factor **                                               |
| <i>Igf1</i>   | Mm00439560_m1   | <i>Tbp</i>     | 0.320        | 1.207                    | 0.217        | 0.705                    | 0.364        | 0.790                    | Insulin-like growth factor 1 **                                                 |
| <i>Igf2</i>   | Mm00439565_g1   | <i>Gapdh</i>   | 0.000        | 592.335                  | 0.002        | 338.094                  | 0.001        | 416.096                  | Insulin-like growth factor 2 **                                                 |
| <i>Nog</i>    | Mm01297833_s1   | <i>Tbp</i>     | 0.054        | 2.945                    | 0.019        | 2.935                    | 0.021        | 3.067                    | Noggin **                                                                       |
| <i>Pdgfa</i>  | Mm01205760_m1   | <i>Tbp</i>     | 0.021        | 3.005                    | Not detected |                          | 0.016        | 3.669                    | Platelet-derived growth factor a **                                             |
| <i>Pdgfb</i>  | Mm01298578_m1   | <i>Tbp</i>     | 0.321        | 1.098                    | 0.033        | 1.468                    | 0.010        | 2.096                    | Platelet-derived growth factor b **                                             |
| <i>Pdgfc</i>  | Mm00480205_m1   | <i>Tbp</i>     | Not detected |                          | 0.016        | 2.362                    | Not detected |                          | Platelet-derived growth factor c **                                             |
| <i>Pdgfd</i>  | Mm00546829_m1   | <i>Tbp</i>     | Not detected |                          | 0.288        | 0.709                    | 0.139        | 1.644                    | Platelet-derived growth factor d **                                             |
| <i>Shh</i>    | Mm00436527_m1   |                | Not detected |                          | Not detected |                          | Not detected |                          | Sonic hedgehog **                                                               |
| <i>Tgfb1</i>  | Mm01178820_m1   | <i>Tbp</i>     | 0.027        | 0.540                    | 0.488        | 0.817                    | 0.157        | 1.372                    | Transforming growth factor beta 1 **                                            |
| <i>Tgfb2</i>  | Mm01321739_m1   | <i>Tbp</i>     | 0.039        | 2.697                    | 0.757        | 1.081                    | 0.127        | 1.809                    | Transforming growth factor beta 2 **                                            |
| <i>Tgfb3</i>  | Mm01307950_m1   | <i>Tbp</i>     | 0.033        | 2.420                    | 0.094        | 1.854                    | 0.034        | 2.517                    | Transforming growth factor beta 3 **                                            |
| <i>Vegfa</i>  | Mm01281447_m1   | <i>Tbp</i>     | 0.394        | 1.108                    | 0.112        | 1.613                    | 0.461        | 1.358                    | Vascular endothelial growth factor a **                                         |
| <i>Vegfb</i>  | Mm00442102_m1   |                | Not detected |                          | Not detected |                          | Not detected |                          | Vascular endothelial growth factor b **                                         |
| <i>Vegfc</i>  | Mm00437313_m1   | <i>Tbp</i>     | 0.024        | 1.839                    | 0.303        | 1.250                    | 0.015        | 1.996                    | Vascular endothelial growth factor c **                                         |
| <i>Wnt10b</i> | Mm00442104_m1   | <i>Tbp</i>     | 0.180        | 5.829                    | 0.122        | 9.688                    | 0.105        | 11.748                   | Wingless-related integration site 10b **                                        |
| <i>Wnt16</i>  | Mm00446420_m1   | <i>Tbp</i>     | 0.066        | 2.094                    | 0.016        | 4.809                    | 0.014        | 4.362                    | Wingless-related integration site 16 **                                         |
| <i>Wnt2</i>   | Mm00470018_m1   | <i>Tbp</i>     | 0.054        | 3.144                    | 0.090        | 3.555                    | 0.074        | 3.760                    | Wingless-related integration site 2 **                                          |
| <i>Wnt2b</i>  | Mm00437330_m1   |                | Not detected |                          | Not detected |                          | Not detected |                          | Wingless-related integration site 2b **                                         |
| <i>Wnt3a</i>  | Mm00437337_m1   | <i>Tbp</i>     | 0.394        | 1.610                    | 0.441        | 1.520                    | 0.840        | 1.106                    | Wingless-related integration site 3a **                                         |
| <i>Wnt6</i>   | Mm00437353_m1   | <i>Tbp</i>     | 0.015        | 11.709                   | 0.018        | 10.400                   | 0.016        | 10.758                   | Wingless-related integration site 6 **                                          |
| <i>Wnt7a</i>  | Mm00437355_m1   |                | Not detected |                          | Not detected |                          | Not detected |                          | Wingless-related integration site 7a **                                         |
| <i>Wnt7b</i>  | Mm00437357_m1   | <i>Tbp</i>     | 0.003        | 4.180                    | 0.056        | 6.076                    | 0.003        | 4.181                    | Wingless-related integration site 7b **                                         |



## Putatively involved

| Gene symbol      | Taqman assay ID | Reference gene | E14vsP90       |                          | E16vsP90       |                          | P1vsP90        |                          | Function                                                                             |
|------------------|-----------------|----------------|----------------|--------------------------|----------------|--------------------------|----------------|--------------------------|--------------------------------------------------------------------------------------|
|                  |                 |                | P-value        | Relative fold expression | P-value        | Relative fold expression | P-value        | Relative fold expression |                                                                                      |
| <i>18S</i>       | Hs99999901_s1   |                | Reference gene |                          | Reference gene |                          | Reference gene |                          | Reference gene                                                                       |
| <i>Arsa</i>      | Mm00802173_g1   | <i>Tbp</i>     | 0.253          | 0.820                    | 0.840          | 0.934                    | 0.730          | 1.083                    | Desulfation of cerebroside                                                           |
| <i>Arsg</i>      | Mm00546931_m1   | <i>Tbp</i>     | 0.004          | 0.705                    | 0.003          | 0.408                    | 0.275          | 1.329                    | Paralog of Arsa                                                                      |
| <i>B3galnt1</i>  | Mm00480272_s1   | <i>Tbp</i>     | 0.003          | 2.976                    | 0.020          | 1.713                    | 0.059          | 1.852                    | Transferring UDP-GalNAc or UDP-GlcNAc to N-GlcNAc, Galactose or N-GalNAc             |
| <i>B4galnt3</i>  | Mm01189804_m1   | <i>Tbp</i>     | 0.020          | 0.319                    | 0.030          | 0.417                    | 0.403          | 0.874                    | Transferring UDP-GalNAc or UDP-GlcNAc to N-GlcNAc, Galactose or N-GalNAc             |
| <i>B4galnt4</i>  | Mm00625968_g1   | <i>Tbp</i>     | 0.055          | 8.732                    | 0.532          | 1.484                    | 0.216          | 2.604                    | Transferring UDP-GalNAc or UDP-GlcNAc to N-GlcNAc, Galactose or N-GalNAc             |
| <i>C1galt1</i>   | Mm00473986_m1   | <i>Tbp</i>     | 0.017          | 0.503                    | 0.016          | 0.458                    | 0.149          | 0.675                    | Transferring UDP-Gal to N-GalNAc.                                                    |
| <i>C1galt1c1</i> | Mm00480676_m1   | <i>Tbp</i>     | 0.321          | 0.862                    | 0.712          | 1.042                    | 0.878          | 0.972                    | C1GALT1-specific chaperone 1                                                         |
| <i>Chst1</i>     | Mm00517855_m1   | <i>Tbp</i>     | 0.006          | 1.723                    | 0.019          | 2.637                    | 0.012          | 2.241                    | Involved in sulfation of keratan sulfate                                             |
| <i>Gapdh</i>     | Mm03302249_g1   |                | Reference gene |                          | Reference gene |                          | Reference gene |                          | Reference gene                                                                       |
| <i>Gla</i>       | Mm00516323_m1   | <i>Tbp</i>     | 0.422          | 0.913                    | 0.018          | 0.494                    | 0.900          | 0.946                    | Hydrolysis of galactose units                                                        |
| <i>Glb1</i>      | Mm00515342_m1   | <i>Tbp</i>     | 0.030          | 1.606                    | 0.152          | 1.578                    | 0.338          | 1.403                    | Hydrolysis of galactose units                                                        |
| <i>Glb1l2</i>    | Mm00464245_m1   | <i>Tbp</i>     | 0.011          | 0.039                    | 0.056          | 0.319                    | 0.164          | 0.539                    | Hydrolysis of galactose units                                                        |
| <i>Gnpda1</i>    | Mm01254913_g1   | <i>Tbp</i>     | 0.046          | 0.702                    | 0.045          | 0.548                    | 0.374          | 0.821                    | Conversion of GlcNAc-6-P into fructose-6-P                                           |
| <i>Gnpda2</i>    | Mm00503573_m1   | <i>Tbp</i>     | 0.112          | 0.772                    | 0.453          | 0.857                    | 0.135          | 1.355                    | Conversion of GlcNAc-6-P into fructose-6-P                                           |
| <i>Khk</i>       | Mm00434647_m1   |                | Not detected   |                          | Not detected   |                          | Not detected   |                          | Phosphorylating fructose to fructose-1-P                                             |
| <i>Kl</i>        | Mm00502002_m1   |                | Not detected   |                          | Not detected   |                          | Not detected   |                          | Putative glucuronidase                                                               |
| <i>Klb</i>       | Mm00473122_m1   | <i>Tbp</i>     | Not detected   |                          | 0.311          | 1.268                    | 0.141          | 2.593                    | Putative glucuronidase                                                               |
| <i>Renbp</i>     | Mm00491720_m1   | <i>Tbp</i>     | 0.175          | 0.690                    | 0.847          | 0.963                    | 0.575          | 1.095                    | Concersion of N-GlcNAc to N-acetylmannosamine                                        |
| <i>Slc17a5</i>   | Mm00555344_m1   | <i>Tbp</i>     | 0.073          | 0.758                    | 0.050          | 0.767                    | 0.078          | 1.350                    | Transport of GlcA from lysosome to cytoplasm                                         |
| <i>Slc26a3</i>   | Mm00445313_m1   |                | Not detected   |                          | Not detected   |                          | Not detected   |                          | Transferring chloride ions across the cell membrane in exchange for bicarbonate ions |
| <i>Slc26a4</i>   | Mm00442308_m1   |                | Not detected   |                          | Not detected   |                          | Not detected   |                          | Transferring chloride ions across the cell membrane                                  |
| <i>Slc26a5</i>   | Mm00446145_m1   |                | Not detected   |                          | Not detected   |                          | Not detected   |                          | Protein functions as a molecular motor in motile outer hair cells of the cochlea     |
| <i>Slc35a1</i>   | Mm00442341_m1   | <i>Tbp</i>     | 0.019          | 1.514                    | 0.425          | 1.088                    | 0.536          | 0.920                    | Putative CMP-Sialic Acid Transporter                                                 |
| <i>Tbp</i>       | Mm01277045_m1   | <i>Tbp</i>     | 0.293          | 1.000                    | 0.423          | 1.000                    | 0.423          | 1.000                    | Reference gene                                                                       |
| <i>Ugt8a</i>     | Mm00495930_m1   | <i>Tbp</i>     | 0.996          | 1.001                    | 0.049          | 0.293                    | 0.227          | 0.670                    | Transfere galactose to ceramide                                                      |

\* Glc, glucosamine; GlcNAc, N-acetylated glucosamine; Gal, galactosamine; GalNAc, N-acetylated galactosamine; GlcA, glucuronic acid; IdoA, iduronic acid. \*\*Uijtdewilligen *et al.*, 2016.

Genes, for which a signal was not or only partly detected at a given timepoint or multiple timepoints and therefore a fold change and/or p-value could not be calculated based on the available data, are given as 'not detected'. Gene symbol for which all timepoints were classified as 'not detected' do not show a reference gene due to lack of data for a calculation.

**Supplementary data table 5: Differentially expressed genes during skin development in mice in comparison to mature mouse skin using EXON arrays**

| Gene symbol     | Taqman assay ID | Affymetrix ID  | Present on |         | E14vsP90       |             | E16vsP90       |             | P1vsP90        |             | Function                                                                 |
|-----------------|-----------------|----------------|------------|---------|----------------|-------------|----------------|-------------|----------------|-------------|--------------------------------------------------------------------------|
|                 |                 |                | Cart V1    | Cart V2 | Stepup         | Fold change | Stepup         | Fold change | Stepup         | Fold change |                                                                          |
|                 |                 |                |            |         | P-value        |             | P-value        |             | P-value        |             |                                                                          |
| <i>Adpgk</i>    | Mm00511302_m1   | 6989534        | Yes        | Yes     | 0.047          | 1.641       | 0.083          | 1.614       | 0.233          | 1.384       | Phosphorylation of glucose into glucose-6-P                              |
| <i>Gale</i>     | Mm00617772_g1   | 6917794        | Yes        | Yes     | 0.674          | 0.858       | 0.612          | 0.834       | 0.244          | 0.555       | Conversion of UDP-GlcNAc to UDP-GalNAc                                   |
| <i>Galk1</i>    | Mm00444182_m1   | 6792485        | Yes        | Yes     | 0.030          | 4.242       | 0.126          | 2.483       | 0.231          | 2.194       | Phosphorylation of Galactose into Galactose-1-P                          |
| <i>Galk2</i>    | Mm00613268_m1   | 6880899        | Yes        | Yes     | 0.447          | 1.188       | 0.434          | 0.832       | 0.709          | 0.881       | Phosphorylation of N-Acetylgalactosamine (GalNAc) into GalNAc-1P)        |
| <i>Galt</i>     | Mm00489459_g1   | 6912944        | Yes        | Yes     | 0.664          | 0.814       | 0.231          | 1.864       | 0.665          | 1.340       | UDP-activation of Glucose-1-P and Galactose-1-P                          |
| <i>Gck</i>      | Mm00439129_m1   | 6785753        | Yes        | Yes     | 0.045          | 0.640       | 0.489          | 1.125       | 0.305          | 0.787       | Phosphorylation of glucose into glucose-6-P                              |
| <i>Gfpt1</i>    | Mm00600127_m1   | 6947679        | Yes        | Yes     | 0.020          | 2.110       | 0.077          | 1.682       | 0.801          | 1.081       | Conversion of fructose-6-P into glucosamine-6-P (Glc-6-P)                |
| <i>Gfpt2</i>    | Mm00496565_m1   | 6780767        | Yes        | Yes     | 0.176          | 0.610       | 0.087          | 0.426       | 0.229          | 0.547       | Conversion of fructose-6-P into Glc-6-P                                  |
| <i>Gnpnat1</i>  | Mm00834602_mH   | Not available* | Yes        | Yes     | Not available* |             | Not available* |             | Not available* |             | Conversion of Glc-6-P into N-Acetylglucosamine-6-P (GlcNAc-6-P)          |
| <i>Gpi1</i>     | Mm02026122_g1   | 6966425        | Yes        | Yes     | 0.277          | 1.220       | 0.429          | 1.160       | 0.485          | 1.194       | Isomerisation of glucose-6-P into fructose-6-P                           |
| <i>Hk1</i>      | Mm00439344_m1   | 6774391        | Yes        | Yes     | 0.469          | 0.824       | 0.549          | 0.849       | 0.185          | 0.588       | Phosphorylation of glucose into glucose-6-P                              |
| <i>Hk2</i>      | Mm00443385_m1   | 6954982        | Yes        | Yes     | 0.003          | 0.451       | 0.040          | 1.375       | 0.039          | 0.655       | Phosphorylation of glucose into glucose-6-P                              |
| <i>Miox</i>     | Mm00480214_m1   | 6832572        | Yes        | Yes     | 0.795          | 1.042       | 0.234          | 1.212       | 0.825          | 0.950       | Conversion of Myo-inositol into UDP-GlcA                                 |
| <i>Nagk</i>     | Mm00479878_m1   | 6947460        | Yes        | Yes     | 0.900          | 1.055       | 0.468          | 0.763       | 0.652          | 0.787       | Phosphorylation of GlcNAc to GlcNAc-6-P                                  |
| <i>Papss1</i>   | Mm00442283_m1   | 6901413        | Yes        | Yes     | 0.696          | 1.238       | 0.786          | 0.861       | 0.997          | 1.004       | Synthesis of PAPS complex                                                |
| <i>Papss2</i>   | Mm00442295_m1   | 6889216        | Yes        | Yes     | 0.040          | 2.474       | 0.203          | 1.605       | 0.643          | 1.241       | Synthesis of PAPS complex                                                |
| <i>Pgm1</i>     | Mm00804141_m1   | 6931181        | Yes        | Yes     | 0.088          | 0.689       | 0.050          | 0.535       | 0.109          | 0.605       | Conversion of glucose-6-P into glucose-1-P                               |
| <i>Pgm2</i>     | Mm00728285_s1   | 6915791        | Yes        | Yes     | 0.401          | 0.816       | 0.538          | 1.165       | 0.762          | 1.120       | Conversion of glucose-6-P into glucose-1-P                               |
| <i>Pgm3</i>     | Mm00459270_m1   | 6997513        | Yes        | Yes     | 0.083          | 2.193       | 0.676          | 1.178       | 0.654          | 1.286       | Conversion of GlcNAc-6-P into GlcNAc-1-P                                 |
| <i>Pgm5</i>     | Mm00723432_m1   | 6872290        | Yes        | Yes     | 0.058          | 2.338       | 0.104          | 2.209       | 0.291          | 1.696       | Conversion of glucose-6-P into glucose-1-P                               |
| <i>Slc13a1</i>  | Mm00490339_m1   | 6952151        | Yes        | Yes     | 0.474          | 0.897       | 0.363          | 1.156       | 0.939          | 1.021       | Transport of sulphate from the extracellular space to cytoplasm          |
| <i>Slc13a4</i>  | Mm00556495_m1   | 6952679        | Yes        | Yes     | 0.482          | 1.144       | 0.581          | 1.113       | 0.652          | 1.134       | Transport of sulphate from the extracellular space to cytoplasm          |
| <i>Slc13a5</i>  | Mm01334459_m1   | 6789531        | Yes        | Yes     | 0.003          | 2.588       | 0.059          | 1.322       | 0.576          | 1.075       | Transport of sulphate from the extracellular space to cytoplasm          |
| <i>Slc26a11</i> | Mm00626632_m1   | 6785369        | Yes        | Yes     | 0.068          | 0.755       | 0.184          | 0.820       | 0.970          | 1.009       | Transport of sulphate from the extracellular space to cytoplasm          |
| <i>Slc26a2</i>  | Mm00432896_m1   | 6865971        | Yes        | Yes     | 0.164          | 1.260       | 0.077          | 1.509       | 0.242          | 0.770       | Transport of sulphate from the extracellular space to cytoplasm          |
| <i>Slc26a6</i>  | Mm00506742_m1   | 6992374        | Yes        | Yes     | 0.475          | 0.921       | 0.158          | 0.818       | 0.608          | 0.918       | Transport of sulphate from the extracellular space to cytoplasm          |
| <i>Slc26a7</i>  | Mm00524162_m1   | 6919879        | Yes        | Yes     | 0.843          | 1.082       | 0.444          | 1.319       | 0.220          | 1.872       | Transport of sulphate from the extracellular space to cytoplasm          |
| <i>Slc26a8</i>  | Mm00524836_m1   | 6854619        | Yes        | Yes     | 0.884          | 0.977       | 0.133          | 1.309       | 0.818          | 1.052       | Transport of sulphate from the extracellular space to cytoplasm          |
| <i>Slc26a9</i>  | Mm00628490_m1   | 6753079        | Yes        | Yes     | 0.012          | 0.227       | 0.090          | 0.471       | 0.091          | 0.392       | Transport of sulphate from the extracellular space to cytoplasm          |
| <i>Slc2a1</i>   | Mm01192270_m1   | 6916748        | No         | Yes     | 0.277          | 1.613       | 0.311          | 1.605       | 0.254          | 0.491       | Sugar transport across plasma membrane                                   |
| <i>Slc2a10</i>  | Mm00453716_m1   | 6883184        | No         | Yes     | 0.059          | 1.836       | 0.173          | 1.523       | 0.083          | 2.266       | Sugar transport across plasma membrane                                   |
| <i>Slc2a12</i>  | Mm00619244_m1   | 6766491        | No         | Yes     | 0.007          | 0.263       | 0.016          | 0.258       | 0.032          | 0.315       | Sugar transport across plasma membrane                                   |
| <i>Slc2a2</i>   | Mm00446230_g1   | 6896428        | No         | Yes     | 0.461          | 1.176       | 0.257          | 1.318       | 0.811          | 1.087       | Sugar transport across plasma membrane                                   |
| <i>Slc2a3</i>   | Mm00441483_m1   | 6957051        | No         | Yes     | 0.063          | 15.969      | 0.334          | 3.430       | 0.947          | 0.868       | Sugar transport across plasma membrane                                   |
| <i>Slc2a4</i>   | Mm01245507_g1   | 6789367        | No         | Yes     | 0.006          | 0.298       | 0.044          | 0.525       | 0.857          | 1.054       | Sugar transport across plasma membrane                                   |
| <i>Slc2a5</i>   | Mm00600311_m1   | 6918858        | No         | Yes     | 0.077          | 0.691       | 0.365          | 0.847       | 0.344          | 0.794       | Sugar transport across plasma membrane                                   |
| <i>Slc2a6</i>   | Mm00554217_m1   | 6885514        | No         | Yes     | 0.021          | 0.667       | 0.740          | 0.964       | 0.168          | 0.799       | Sugar transport across plasma membrane                                   |
| <i>Slc2a8</i>   | Mm00444634_m1   | 6885923        | No         | Yes     | 0.087          | 0.702       | 0.323          | 0.830       | 0.878          | 0.955       | Sugar transport across plasma membrane                                   |
| <i>Slc2a9</i>   | Mm01211147_m1   | Not available* | No         | Yes     | Not available* |             | Not available* |             | Not available* |             | Sugar transport across plasma membrane                                   |
| <i>Slc35a2</i>  | Mm00446504_m1   | 7009796        | Yes        | Yes     | 0.266          | 1.396       | 0.747          | 1.104       | 0.960          | 0.973       | Transport from cytoplasm to Golgi system of UDP-GalNAc and UDP-Galactose |
| <i>Slc35a3</i>  | Mm00523288_m1   | 6908510        | Yes        | Yes     | 0.105          | 0.767       | 0.596          | 0.925       | 0.572          | 0.890       | Transport from cytoplasm to Golgi system of UDP-GlcNAc                   |
| <i>Slc35a4</i>  | Mm00782997_s1   | 6860121        | Yes        | Yes     | 0.270          | 1.425       | 0.847          | 1.068       | 0.744          | 1.171       | Transport from cytoplasm to Golgi system of UDP-GalNAc and UDP-Galactose |
| <i>Slc35b1</i>  | Mm00450258_m1   | 6783740        | Yes        | Yes     | 0.723          | 0.903       | 0.184          | 0.651       | 0.716          | 0.863       | Transport from cytoplasm to Golgi system of UDP-GalNAc and UDP-Galactose |
| <i>Slc35b2</i>  | Mm01269910_m1   | 6850646        | Yes        | Yes     | 0.336          | 1.341       | 0.478          | 1.247       | 0.868          | 1.089       | Transport of PAPS complex from cytoplasm to Golgi system                 |
| <i>Slc35b3</i>  | Mm00506275_m1   | 6812534        | Yes        | Yes     | 0.021          | 1.270       | 0.877          | 0.990       | 0.227          | 1.117       | Transport of PAPS complex from cytoplasm to Golgi system                 |
| <i>Slc35b4</i>  | Mm00480588_m1   | 6952601        | Yes        | Yes     | 0.482          | 1.129       | 0.687          | 1.074       | 0.907          | 1.035       | Transport from cytoplasm to Golgi system of UDP-GlcNAc and UDP-Xylose    |
| <i>Slc35d1</i>  | Mm00624959_m1   | 6924027        | Yes        | Yes     | 0.229          | 1.372       | 0.440          | 1.226       | 0.709          | 1.153       | Transport from cytoplasm to Golgi system of UDP-GalNAc and UDP-GlcA      |
| <i>Slc35d2</i>  | Mm01304830_m1   | 6813876        | Yes        | Yes     | 0.067          | 0.867       | 0.101          | 0.866       | 0.051          | 0.763       | Transport from cytoplasm to Golgi system of UDP-GlcNAc                   |
| <i>Slc35d3</i>  | Mm01717003_m1   | 6772476        | Yes        | Yes     | 0.133          | 1.509       | 0.078          | 1.932       | 0.344          | 1.391       | Paralog of Slc35d1                                                       |
| <i>Uap1</i>     | Mm00505476_m1   | 6764011        | Yes        | Yes     | 0.168          | 1.335       | 0.758          | 1.065       | 0.785          | 1.088       | UDP-activation of GlcNAc-1-P and GalNAc-1-P                              |

|             |               |         |     |     |       |       |       |       |       |       |                                                               |
|-------------|---------------|---------|-----|-----|-------|-------|-------|-------|-------|-------|---------------------------------------------------------------|
| <i>Ugdh</i> | Mm00447643_m1 | 6938704 | Yes | Yes | 0.100 | 1.282 | 0.451 | 0.903 | 0.558 | 1.117 | Conversion of UDP-glucose into UDP-glucuronic acid (UDP-GlcA) |
| <i>Ugp2</i> | Mm00454826_m1 | 6786561 | Yes | Yes | 0.203 | 1.203 | 0.956 | 0.991 | 0.215 | 1.287 | UDP-activation of Glucose-1-P                                 |
| <i>Uxs1</i> | Mm00550735_m1 | 6758325 | Yes | Yes | 0.595 | 1.160 | 0.692 | 0.894 | 0.865 | 0.925 | Conversion of UDP-GlcA into UDP-xylose                        |

## Core proteins

| Gene symbol    | Taqman assay ID | Affymetrix ID  | Present on |         | E14vsP90       |             | E16vsP90       |             | P1vsP90        |             | Function                                                        |
|----------------|-----------------|----------------|------------|---------|----------------|-------------|----------------|-------------|----------------|-------------|-----------------------------------------------------------------|
|                |                 |                | Cart V1    | Cart V2 | Stepup P-value | Fold change | Stepup P-value | Fold change | Stepup P-value | Fold change |                                                                 |
|                |                 |                |            |         |                |             |                |             |                |             |                                                                 |
| <i>Acan</i>    | Mm00545807_m1   | 6961912        | No         | Yes     | 0.007          | 17.401      | 0.744          | 0.857       | 0.890          | 1.114       | Proteoglycan carrying CS or DS                                  |
| <i>Agrn</i>    | Mm01545840_m1   | 6927362        | Yes        | Yes     | 0.682          | 1.082       | 0.272          | 1.252       | 0.892          | 1.044       | Proteoglycan carrying HS present in ECM                         |
| <i>Aspn</i>    | Mm00445945_m1   | 6806958        | No         | Yes     | 0.074          | 2.199       | 0.406          | 1.373       | 0.088          | 3.129       | Proteoglycan carrying CS or DS                                  |
| <i>Bcan</i>    | Mm00476090_m1   | 6906694        | No         | Yes     | 0.663          | 1.097       | 0.255          | 1.297       | 0.919          | 0.964       | Proteoglycan carrying CS or DS                                  |
| <i>Bgn</i>     | Mm00455918_m1   | 7011936        | No         | Yes     | 0.017          | 0.721       | 0.054          | 0.776       | 0.061          | 1.352       | Proteoglycan carrying CS or DS                                  |
| <i>Cd44</i>    | Mm01277164_m1   | 6889258        | Yes        | Yes     | 0.009          | 0.370       | 0.144          | 0.728       | 0.873          | 0.955       | Proteoglycan carrying HS and hyaluronic acid on cell surface    |
| <i>Col18a1</i> | Mm00487131_m1   | 6775201        | Yes        | Yes     | 0.440          | 0.885       | 0.324          | 0.847       | 0.359          | 0.818       | Proteoglycan carrying HS present in basement membrane           |
| <i>Col9a2</i>  | Mm00483872_m1   | 6916849        | No         | Yes     | 0.012          | 5.104       | 0.292          | 1.462       | 0.997          | 1.003       | Proteoglycan carrying CS or DS                                  |
| <i>Cspg4</i>   | Mm00507256_m1   | 6989349        | No         | Yes     | 0.693          | 0.918       | 0.636          | 0.905       | 0.693          | 1.130       | Proteoglycan carrying CS or DS                                  |
| <i>Cspg5</i>   | Mm00516549_m1   | 6992428        | No         | Yes     | 0.015          | 2.593       | 0.099          | 1.639       | 0.506          | 1.225       | Proteoglycan carrying CS or DS                                  |
| <i>Dcn</i>     | Mm03003496_s1   | 6770064        | No         | Yes     | 0.221          | 0.705       | 0.252          | 0.703       | 0.399          | 0.723       | Proteoglycan carrying CS or DS                                  |
| <i>Epyc</i>    | Mm00514611_m1   | 6770076        | No         | Yes     | 0.001          | 21.280      | 0.365          | 1.162       | 0.597          | 0.886       | Proteoglycan carrying CS or DS                                  |
| <i>Gpc1</i>    | Mm00497305_m1   | 6751634        | Yes        | Yes     | 0.404          | 1.111       | 0.305          | 1.150       | 0.312          | 1.197       | Proteoglycan carrying HS present on cell surface via GPI-anchor |
| <i>Gpc2</i>    | Mm00549650_m1   | Not available* | Yes        | Yes     | Not available* |             | Not available* |             | Not available* |             | Proteoglycan carrying HS present on cell surface via GPI-anchor |
| <i>Gpc3</i>    | Mm00516722_m1   | 7016826        | Yes        | Yes     | 0.003          | 4.339       | 0.013          | 3.305       | 0.015          | 4.721       | Proteoglycan carrying HS present on cell surface via GPI-anchor |
| <i>Gpc4</i>    | Mm00515035_m1   | 7016823        | Yes        | Yes     | 0.667          | 1.117       | 0.723          | 0.913       | 0.694          | 1.157       | Proteoglycan carrying HS present on cell surface via GPI-anchor |
| <i>Gpc5</i>    | Mm00615599_m1   | 6821935        | Yes        | Yes     | 0.342          | 1.092       | 0.461          | 1.073       | 0.411          | 0.899       | Proteoglycan carrying HS present on cell surface via GPI-anchor |
| <i>Gpc6</i>    | Mm00516235_m1   | 6821985        | Yes        | Yes     | 0.019          | 2.767       | 0.109          | 1.747       | 0.193          | 1.640       | Proteoglycan carrying HS present on cell surface via GPI-anchor |
| <i>Hmmer</i>   | Mm00469183_m1   | 6787469        | No         | Yes     | 0.059          | 3.525       | 0.191          | 2.263       | 0.987          | 0.984       | Hyaluronan-Mediated Motility Receptor                           |
| <i>Hspg2</i>   | Mm01181179_g1   | 6917933        | Yes        | Yes     | 0.309          | 1.183       | 0.075          | 1.554       | 0.042          | 2.230       | Proteoglycan carrying HS present in ECM                         |
| <i>Ncan</i>    | Mm00484007_m1   | 6983162        | No         | Yes     | 0.001          | 8.732       | 0.101          | 1.213       | 0.908          | 1.017       | Proteoglycan carrying CS or DS                                  |
| <i>Sdc1</i>    | Mm00448918_m1   | 6793226        | Yes        | Yes     | 0.031          | 0.380       | 0.067          | 0.413       | 0.103          | 0.424       | Proteoglycan carrying HS present on cell surface                |
| <i>Sdc2</i>    | Mm00484718_m1   | 6829598        | Yes        | Yes     | 0.479          | 1.406       | 0.545          | 0.744       | 0.669          | 1.356       | Proteoglycan carrying HS present on cell surface                |
| <i>Sdc3</i>    | Mm01179831_m1   | 6917389        | Yes        | Yes     | 0.987          | 1.006       | 0.107          | 0.539       | 0.240          | 0.622       | Proteoglycan carrying HS present on cell surface                |
| <i>Sdc4</i>    | Mm00488527_m1   | 6892905        | Yes        | Yes     | 0.017          | 0.341       | 0.094          | 0.536       | 0.215          | 0.621       | Proteoglycan carrying HS present on cell surface                |
| <i>Smc3</i>    | Mm00484015_m1   | 6870470        | No         | Yes     | 0.007          | 1.969       | 0.049          | 1.438       | 0.112          | 1.329       | Proteoglycan carrying CS or DS                                  |
| <i>Srgn</i>    | Mm01169070_m1   | 6774400        | No         | Yes     | 0.224          | 0.671       | 0.856          | 1.064       | 0.631          | 0.799       | Proteoglycan carrying CS or DS                                  |
| <i>Vcan</i>    | Mm01283063_m1   | 6814956        | No         | Yes     | 0.006          | 3.673       | 0.023          | 2.792       | 0.029          | 3.226       | Proteoglycan carrying CS or DS                                  |

## Preparation of linkage region

| Gene symbol    | Taqman assay ID | Affymetrix ID | Present on |         | E14vsP90       |             | E16vsP90       |             | P1vsP90        |             | Function                                                            |
|----------------|-----------------|---------------|------------|---------|----------------|-------------|----------------|-------------|----------------|-------------|---------------------------------------------------------------------|
|                |                 |               | Cart V1    | Cart V2 | Stepup P-value | Fold change | Stepup P-value | Fold change | Stepup P-value | Fold change |                                                                     |
|                |                 |               |            |         |                |             |                |             |                |             |                                                                     |
| <i>B3galt6</i> | Mm00504458_s1   | 6927341       | Yes        | Yes     | 0.764          | 1.202       | 0.764          | 0.837       | 0.708          | 1.373       | Transferring UDP-galactose to galactose-xylose on proteoglycan      |
| <i>B3gat1</i>  | Mm00661499_m1   | 6987632       | Yes        | Yes     | 0.008          | 3.467       | 0.256          | 1.302       | 0.828          | 0.929       | Transferring UDP-GlcA to galactose-galactose-xylose on proteoglycan |
| <i>B3gat2</i>  | Mm00549042_m1   | 6748174       | Yes        | Yes     | 0.009          | 3.241       | 0.286          | 1.269       | 0.690          | 1.129       | Transferring UDP-GlcA to galactose-galactose-xylose on proteoglycan |
| <i>B3gat3</i>  | Mm00470389_m1   | 6867978       | Yes        | Yes     | 0.672          | 0.954       | 0.295          | 0.886       | 0.349          | 0.870       | Transferring UDP-GlcA to galactose-galactose-xylose on proteoglycan |
| <i>B4galt2</i> | Mm00479556_m1   | 6924869       | Yes        | Yes     | 0.039          | 1.726       | 0.053          | 1.865       | 0.176          | 1.477       | Transferring UDP-galactose to GlcNAc, Glc, and Xyl.                 |
| <i>B4galt7</i> | Mm00461357_m1   | 6807252       | Yes        | Yes     | 0.135          | 1.221       | 0.701          | 1.049       | 0.710          | 0.935       | Transferring UDP-galactose to xylose on proteoglycan                |
| <i>Xylt1</i>   | Mm00558690_m1   | 6963793       | Yes        | Yes     | 0.957          | 1.005       | 0.390          | 0.935       | 0.108          | 1.224       | Transferring UDP-xylose to proteoglycan                             |
| <i>Xylt2</i>   | Mm00461181_m1   | 6790972       | Yes        | Yes     | 0.801          | 0.950       | 0.957          | 0.988       | 0.820          | 1.070       | Transferring UDP-xylose to proteoglycan                             |

## GAG chain polymerisation

| Gene symbol       | Taqman assay ID | Affymetrix ID  | Present on |         | E14vsP90       |             | E16vsP90       |             | P1vsP90        |             | Function                                                   |
|-------------------|-----------------|----------------|------------|---------|----------------|-------------|----------------|-------------|----------------|-------------|------------------------------------------------------------|
|                   |                 |                | Cart V1    | Cart V2 | Stepup         | Fold change | Stepup         | Fold change | Stepup         | Fold change |                                                            |
|                   |                 |                |            |         | P-value        |             | P-value        |             | P-value        |             |                                                            |
| <i>Chpf</i>       | Mm01262239_g1   | 6759816        | Yes        | Yes     | 0.071          | 1.679       | 0.182          | 1.459       | 0.309          | 1.403       | Transferring UDP-GlcA to GalNAc at end of sugar chain (CS) |
| <i>Chsy1</i>      | Mm01319178_m1   | Not available* | Yes        | Yes     | Not available* |             | Not available* |             | Not available* |             | Transferring UDP-GlcA to GalNAc at end of sugar chain (CS) |
| <i>Chsy3</i>      | Mm01545329_m1   | 6861281        | Yes        | Yes     | 0.429          | 1.153       | 0.056          | 1.769       | 0.849          | 1.058       | Transferring UDP-GlcA to GalNAc at end of sugar chain (CS) |
| <i>Csgalnact1</i> | Mm00555164_m1   | 6983073        | Yes        | Yes     | 0.137          | 0.512       | 0.202          | 0.541       | 0.974          | 0.975       | Transferring UDP-GalNAc to GlcA at end of sugar chain (CS) |
| <i>Csgalnact2</i> | Mm00513340_m1   | 6956864        | Yes        | Yes     | 0.475          | 0.819       | 0.734          | 1.103       | 0.407          | 1.382       | Transferring UDP-GalNAc to GlcA at end of sugar chain (CS) |
| <i>Ext1</i>       | Mm00468769_m1   | 6835692        | Yes        | Yes     | 0.881          | 1.024       | 0.351          | 0.873       | 0.936          | 0.980       | Transferring UDP-GlcNAc to GlcA at end of sugar chain (HS) |
| <i>Ext2</i>       | Mm00468775_m1   | 6888925        | Yes        | Yes     | 0.086          | 1.336       | 0.319          | 1.166       | 0.358          | 1.202       | Transferring UDP-GlcNAc to GlcA at end of sugar chain (HS) |
| <i>Extl1</i>      | Mm00621977_s1   | 6926017        | Yes        | Yes     | 0.025          | 0.407       | 0.149          | 0.625       | 0.114          | 0.505       | Transferring UDP-GlcA to GlcNAc at end of sugar chain (HS) |
| <i>Extl2</i>      | Mm00469621_m1   | 6900659        | Yes        | Yes     | 0.085          | 1.702       | 0.819          | 1.066       | 0.518          | 1.272       | Transferring UDP-GlcA to GlcNAc at end of sugar chain (HS) |
| <i>Extl3</i>      | Mm00516994_m1   | 6825402        | Yes        | Yes     | 0.895          | 1.024       | 0.723          | 0.944       | 0.312          | 1.250       | Transferring UDP-GlcA to GlcNAc at end of sugar chain (HS) |
| <i>Has1</i>       | Mm00468496_m1   | 6854042        | Yes        | Yes     | 0.465          | 0.793       | 0.226          | 1.548       | 0.278          | 1.628       | Polymerisation of hyaluronic acid                          |
| <i>Has2</i>       | Mm00515089_m1   | 6835856        | Yes        | Yes     | 0.095          | 2.107       | 0.157          | 1.969       | 0.537          | 1.403       | Polymerisation of hyaluronic acid                          |
| <i>Has3</i>       | Mm00515091_m1   | 6978932        | Yes        | Yes     | 0.861          | 1.149       | 0.128          | 3.994       | 0.202          | 3.726       | Polymerisation of hyaluronic acid                          |

## GAG chain modification

| Gene symbol     | Taqman assay ID | Affymetrix ID  | Present on |         | E14vsP90       |             | E16vsP90       |             | P1vsP90        |             | Function                                                                                  |
|-----------------|-----------------|----------------|------------|---------|----------------|-------------|----------------|-------------|----------------|-------------|-------------------------------------------------------------------------------------------|
|                 |                 |                | Cart V1    | Cart V2 | Stepup         | Fold change | Stepup         | Fold change | Stepup         | Fold change |                                                                                           |
|                 |                 |                |            |         | P-value        |             | P-value        |             | P-value        |             |                                                                                           |
| <i>Chst11</i>   | Mm00517563_m1   | 6769366        | Yes        | Yes     | 0.049          | 1.922       | 0.465          | 1.208       | 0.239          | 1.531       | Sulfation at the 4-O position of GalNAc units (CS)                                        |
| <i>Chst12</i>   | Mm00546416_s1   | 6935275        | Yes        | Yes     | 0.448          | 0.646       | 0.632          | 0.756       | 0.995          | 0.993       | Sulfation at the 4-O position of GalNAc units (CS)                                        |
| <i>Chst13</i>   | Mm01186255_s1   | Not available* | Yes        | Yes     | Not available* |             | Not available* |             | Not available* |             | Sulfation at the 4-O position of GalNAc units (CS)                                        |
| <i>Chst14</i>   | Mm00511291_s1   | 6880476        | Yes        | Yes     | 0.151          | 1.491       | 0.506          | 1.191       | 0.773          | 1.122       | Sulfation at the 4-O position of GalNAc units (CS)                                        |
| <i>Chst15</i>   | Mm00513227_m1   | 6971656        | Yes        | Yes     | 0.027          | 1.831       | 0.039          | 1.991       | 0.207          | 1.396       | Sulfation at the 6-O position of GalNAc units (CS)                                        |
| <i>Chst2</i>    | Mm00490018_g1   | 6997990        | Yes        | Yes     | 0.035          | 2.302       | 0.072          | 2.160       | 0.207          | 1.682       | Sulfation at the 6-O position of GalNAc units (CS)                                        |
| <i>Chst3</i>    | Mm00489736_m1   | 6774295        | Yes        | Yes     | 0.885          | 1.034       | 0.108          | 1.545       | 0.162          | 1.530       | Sulfation at the 6-O position of GalNAc units (CS)                                        |
| <i>Chst4</i>    | Mm00488783_s1   | 6985292        | Yes        | No      | 0.197          | 0.696       | 0.254          | 1.407       | 0.912          | 0.951       | Sulfation at the 6-O position of GalNAc units (CS)                                        |
| <i>Chst5</i>    | Mm00517342_m1   | 6985414        | Yes        | Yes     | 0.069          | 1.794       | 0.130          | 1.677       | 0.642          | 1.196       | Sulfation at the 6-O position of GalNAc units (CS)                                        |
| <i>Chst7</i>    | Mm00491466_m1   | 7010308        | Yes        | Yes     | 0.928          | 1.056       | 0.971          | 1.023       | 0.998          | 0.997       | Sulfation at the 6-O position of GalNAc units (CS)                                        |
| <i>Chst8</i>    | Mm00558321_m1   | 6966453        | Yes        | Yes     | 0.945          | 1.007       | 0.569          | 1.054       | 0.420          | 1.108       | Sulfation at the 4-O position of GalNAc units (CS)                                        |
| <i>Chst9</i>    | Mm01722279_m1   | 6863607        | Yes        | Yes     | 0.122          | 1.172       | 0.122          | 1.209       | 0.562          | 1.080       | Sulfation at the 4-O position of GalNAc units (CS)                                        |
| <i>Dse</i>      | Mm00552923_m1   | 6773174        | Yes        | Yes     | 0.916          | 1.028       | 0.407          | 0.826       | 0.837          | 0.928       | Epimerisation of GlcA unit into iduronic acid unit (IdoA) (CS)                            |
| <i>Glce</i>     | Mm00473667_m1   | 6996191        | Yes        | Yes     | 0.059          | 1.280       | 0.189          | 1.175       | 0.086          | 1.385       | Epimerisation of GlcA unit into iduronic acid unit (IdoA) (HS)                            |
| <i>Hs2st1</i>   | Mm00478684_m1   | 6910088        | Yes        | Yes     | 0.080          | 1.553       | 0.453          | 1.178       | 0.195          | 1.504       | Sulfation at the 2-O position of GlcA and IdoA units (HS)                                 |
| <i>Hs3st1</i>   | Mm01964038_s1   | 6937654        | Yes        | Yes     | 0.074          | 1.658       | 0.105          | 1.688       | 0.119          | 1.824       | Sulfation at the 3-O position of GlcNAc and GlcNS units sulfated at the 6-O position (HS) |
| <i>Hs3st2</i>   | Mm00616933_m1   | 6963989        | Yes        | Yes     | 0.951          | 1.017       | 0.215          | 1.380       | 0.934          | 0.967       | Sulfation at the 3-O position of GlcNAc and GlcNS units sulfated at the 6-O position (HS) |
| <i>Hs3st3a1</i> | Mm00780907_s1   | 6781689        | Yes        | Yes     | 0.878          | 1.068       | 0.910          | 1.047       | 0.945          | 0.955       | Sulfation at the 3-O position of GlcNAc and GlcNS units sulfated at the 6-O position (HS) |
| <i>Hs3st3b1</i> | Mm00479621_m1   | 6788991        | Yes        | Yes     | 0.683          | 1.178       | 0.253          | 1.634       | 0.511          | 1.432       | Sulfation at the 3-O position of GlcNAc and GlcNS units sulfated at the 6-O position (HS) |
| <i>Hs3st5</i>   | Mm01192940_m1   | Not available* | No         | Yes     | Not available* |             | Not available* |             | Not available* |             | Sulfation at the 3-O position of GlcNAc and GlcNS units sulfated at the 6-O position (HS) |
| <i>Hs3st6</i>   | Mm01299930_m1   | 6849317        | Yes        | Yes     | 0.019          | 0.406       | 0.291          | 0.771       | 0.721          | 1.130       | Sulfation at the 3-O position of GlcNAc and GlcNS units sulfated at the 6-O position (HS) |
| <i>Hs6st1</i>   | Mm01229698_s1   | 6748605        | Yes        | Yes     | 0.610          | 1.095       | 0.808          | 1.046       | 0.982          | 1.007       | Sulfation at the 6-O position of GlcNAc and N-sulfated-glucuronic acid units (GlcNS) (HS) |
| <i>Hs6st2</i>   | Mm00479296_m1   | 7016808        | Yes        | Yes     | 0.004          | 6.417       | 0.012          | 5.609       | 0.041          | 3.080       | Sulfation at the 6-O position of GlcNAc and GlcNS units (HS)                              |
| <i>Hs6st3</i>   | Mm00479297_m1   | 6822138        | Yes        | Yes     | 0.170          | 1.305       | 0.197          | 1.319       | 0.897          | 1.041       | Sulfation at the 6-O position of GlcNAc and GlcNS units (HS)                              |
| <i>Ndst1</i>    | Mm00447005_m1   | 6865926        | Yes        | Yes     | 0.090          | 1.363       | 0.056          | 1.649       | 0.067          | 1.763       | N-de-acetylation and N-sulfation of GlcNAc unit (HS)                                      |
| <i>Ndst2</i>    | Mm00447818_m1   | 6823122        | Yes        | Yes     | 0.822          | 1.044       | 0.059          | 1.697       | 0.083          | 1.733       | N-de-acetylation and N-sulfation of GlcNAc unit (HS)                                      |
| <i>Ndst3</i>    | Mm00453178_m1   | 6908958        | Yes        | Yes     | 0.173          | 2.472       | 0.111          | 3.856       | 0.122          | 4.860       | N-de-acetylation and N-sulfation of GlcNAc unit (HS)                                      |
| <i>Ndst4</i>    | Mm00480767_m1   | 6901119        | Yes        | Yes     | 0.005          | 1.667       | 0.438          | 1.059       | 0.913          | 0.987       | N-de-acetylation and N-sulfation of GlcNAc unit (HS)                                      |
| <i>Sulf1</i>    | Mm00552283_m1   | 6747641        | Yes        | Yes     | 0.010          | 4.522       | 0.051          | 2.546       | 0.232          | 1.627       | Desulfation of the 6-O position of 6-O sulfated GlcNAc and GlcNS units (HS)               |
| <i>Sulf2</i>    | Mm00511193_m1   | 6893057        | Yes        | Yes     | 0.229          | 1.232       | 0.580          | 0.909       | 0.101          | 1.609       | Desulfation of the 6-O position of 6-O sulfated GlcNAc and GlcNS units (HS)               |
| <i>Sumf1</i>    | Mm00461213_m1   | 6956297        | Yes        | Yes     | 0.487          | 0.744       | 0.281          | 0.607       | 0.785          | 0.834       | Cofactor for Sulf1 and Sulf2 (HS)                                                         |
| <i>Sumf2</i>    | Mm01197721_m1   | Not available* | Yes        | Yes     | Not available* |             | Not available* |             | Not available* |             | Cofactor for Sulf1 and Sulf2 (HS)                                                         |
| <i>Ust</i>      | Mm00616790_m1   | 6771995        | Yes        | Yes     | 0.875          | 0.926       | 0.927          | 1.044       | 0.884          | 1.110       | Sulfation at the 2-O position of GlcA and IdoA units (CS)                                 |

## GAG chain degradation

| Gene symbol   | Taqman assay ID | Affymetrix ID | Present on |         | E14vsP90 |             | E16vsP90 |             | P1vsP90 |             | Function                                                                            |
|---------------|-----------------|---------------|------------|---------|----------|-------------|----------|-------------|---------|-------------|-------------------------------------------------------------------------------------|
|               |                 |               | Cart V1    | Cart V2 | Stepup   | Fold change | Stepup   | Fold change | Stepup  | Fold change |                                                                                     |
|               |                 |               |            |         | P-value  |             | P-value  |             | P-value |             |                                                                                     |
| <i>Arsb</i>   | Mm00802167_m1   | 6809030       | Yes        | Yes     | 0.519    | 1.139       | 0.360    | 1.214       | 0.808   | 0.925       | Desulfation of the 4-O position of 4-O sulfated GalNAc units (CS)                   |
| <i>Arsj</i>   | Mm00557970_m1   | 6901136       | Yes        | Yes     | 0.003    | 2.498       | 0.006    | 3.164       | 0.031   | 1.702       | Desulfation of the 4-O position of 4-O sulfated GalNAc units (CS)                   |
| <i>Arsk</i>   | Mm00513099_m1   | 6814451       | Yes        | Yes     | 0.368    | 0.784       | 0.102    | 0.543       | 0.514   | 0.779       | Desulfation of proteoglycans, paralog of IDS                                        |
| <i>Galns</i>  | Mm00489575_m1   | 6985943       | Yes        | Yes     | 0.087    | 1.671       | 0.322    | 1.311       | 0.786   | 1.115       | Desulfation of the 6-O position of 6-O sulfated GalNAc units (CS)                   |
| <i>Gns</i>    | Mm00659592_m1   | 6771224       | Yes        | Yes     | 0.057    | 0.586       | 0.111    | 0.622       | 0.429   | 0.784       | Desulfation of the 6-O position of 6-O sulfated GlcNAc and GlcNS units (HS)         |
| <i>Gusb</i>   | Mm00446954_g1   | 6942192       | Yes        | Yes     | 0.923    | 0.971       | 0.499    | 0.832       | 0.843   | 0.918       | Hydrolysis of GlcA from sugar chain (HS and Hyaluronic acid and CS)                 |
| <i>Hexa</i>   | Mm00599877_m1   | 6989553       | Yes        | Yes     | 0.262    | 0.619       | 0.204    | 0.535       | 0.358   | 0.583       | Hydrolysis of GalNAc units (CS) and GlcNAc units (hyaluronic acid) from sugar chain |
| <i>Hexb</i>   | Mm00599880_m1   | 6815345       | Yes        | Yes     | 0.204    | 0.611       | 0.130    | 0.480       | 0.287   | 0.570       | Hydrolysis of GalNAc units (CS) and GlcNAc units (hyaluronic acid) from sugar chain |
| <i>Hgsnat</i> | Mm00519485_m1   | 6981182       | Yes        | Yes     | 0.425    | 0.826       | 0.355    | 0.791       | 0.290   | 1.432       | Acetylation of desulfated GlcNS units (HS)                                          |
| <i>Hpse</i>   | Mm00461768_m1   | 6940363       | Yes        | Yes     | 0.021    | 0.267       | 0.540    | 1.244       | 0.095   | 0.360       | Degradation of HS chains extracellularly                                            |
| <i>Hyal1</i>  | Mm00476206_m1   | 6992224       | Yes        | Yes     | 0.003    | 0.154       | 0.011    | 0.222       | 0.041   | 0.402       | Degradation of hyaluronic acid chain                                                |
| <i>Hyal2</i>  | Mm00477731_m1   | 6992221       | Yes        | Yes     | 0.410    | 1.167       | 0.653    | 0.918       | 0.610   | 1.149       | Degradation of hyaluronic acid chain                                                |
| <i>Hyal3</i>  | Mm00662097_m1   | 6992228       | Yes        | Yes     | 0.499    | 0.892       | 0.166    | 1.329       | 0.599   | 1.137       | Degradation of hyaluronic acid chain                                                |
| <i>Ids</i>    | Mm00494868_m1   | 7017419       | Yes        | Yes     | 0.292    | 0.752       | 0.161    | 0.630       | 0.629   | 0.826       | Desulfation of 2-O sulfated IdoA and GlcA units (HS and CS)                         |
| <i>Idua</i>   | Mm00515143_m1   | 6933337       | Yes        | Yes     | 0.089    | 0.689       | 0.259    | 0.790       | 0.721   | 0.904       | Hydrolysis of IdoA unit from sugar chain (HS and CS)                                |
| <i>Mgea5</i>  | Mm00452409_m1   | 6873365       | Yes        | Yes     | 0.893    | 0.935       | 0.973    | 1.017       | 0.968   | 0.969       | Degradation of hyaluronic acid chain                                                |
| <i>Naga</i>   | Mm00476274_m1   | 6837368       | Yes        | Yes     | 0.071    | 0.544       | 0.110    | 0.550       | 0.531   | 0.782       | Hydrolysis N-GalNAc moieties from glycoconjugates.                                  |
| <i>Naglu</i>  | Mm00479175_m1   | 6784237       | Yes        | Yes     | 0.182    | 0.569       | 0.202    | 0.551       | 0.537   | 0.704       | Hydrolysis of GlcNAc from sugar chain (HS)                                          |
| <i>Sgsh</i>   | Mm00450747_m1   | 6792702       | Yes        | Yes     | 0.017    | 0.458       | 0.052    | 0.537       | 0.201   | 0.699       | Desulfation of GlcNS units (HS)                                                     |

## Growth factors

| Gene symbol   | Taqman assay ID | Affymetrix ID  | Present on |         | E14vsP90       |             | E16vsP90       |             | P1vsP90        |             | Function                                                                        |
|---------------|-----------------|----------------|------------|---------|----------------|-------------|----------------|-------------|----------------|-------------|---------------------------------------------------------------------------------|
|               |                 |                | Cart V1    | Cart V2 | Stepup         | Fold change | Stepup         | Fold change | Stepup         | Fold change |                                                                                 |
|               |                 |                |            |         | P-value        |             | P-value        |             | P-value        |             |                                                                                 |
| <i>Areg</i>   | Mm00437583_m1   | 6932394        | Yes        | No      | 0.016          | 0.157       | 0.043          | 0.200       | 0.333          | 0.550       | Amphiregulin **                                                                 |
| <i>Bmp3</i>   | Mm00557790_m1   | 6932718        | Yes        | No      | 0.280          | 1.392       | 0.067          | 2.381       | 0.100          | 2.365       | Bone morphogenetic growth factor 3 **                                           |
| <i>Bmp5</i>   | Mm00432091_m1   | 6990569        | Yes        | No      | 0.001          | 7.247       | 0.141          | 1.191       | 0.688          | 1.057       | Bone morphogenetic growth factor 5 **                                           |
| <i>Ctgf</i>   | Mm01192931_g1   | 6766623        | Yes        | Yes     | 0.148          | 0.729       | 0.025          | 0.366       | 0.068          | 0.485       | Connective tissue growth factor, embryonic growth factor in skin development ** |
| <i>Fgf10</i>  | Mm00433275_m1   | 6810592        | Yes        | Yes     | 0.138          | 1.521       | 0.057          | 2.250       | 0.094          | 2.142       | Fibroblast growth factor 10 **                                                  |
| <i>Fgf13</i>  | Mm00438910_m1   | 7017134        | Yes        | Yes     | 0.012          | 2.998       | 0.075          | 1.824       | 0.296          | 1.391       | Fibroblast growth factor 13 **                                                  |
| <i>Fgf2</i>   | Mm01285715_m1   | 6896850        | Yes        | Yes     | 0.201          | 0.664       | 0.279          | 0.696       | 0.952          | 0.967       | Fibroblast growth factor 2 **                                                   |
| <i>Fgf20</i>  | Mm00748347_m1   | 6981854        | Yes        | No      | 0.659          | 1.228       | 0.125          | 2.483       | 0.777          | 1.220       | Fibroblast growth factor 20 **                                                  |
| <i>Fgf22</i>  | Mm00445749_m1   | 6769141        | Yes        | Yes     | 0.005          | 0.329       | 0.972          | 0.994       | 0.097          | 0.646       | Fibroblast growth factor 22 **                                                  |
| <i>Fgf4</i>   | Mm00438917_m1   | Not available* | No         | Yes     | Not available* |             | Not available* |             | Not available* |             | Growth factor (Uijtdewilligen et al, 2013)**                                    |
| <i>Fgf7</i>   | Mm00433291_m1   | 6880900        | Yes        | Yes     | 0.531          | 0.740       | 0.078          | 0.286       | 0.212          | 0.418       | Fibroblast growth factor 7 **                                                   |
| <i>Fgf8</i>   | Mm00438921_m1   | 6873363        | Yes        | Yes     | 0.492          | 0.883       | 0.655          | 1.085       | 0.682          | 0.895       | Fibroblast growth factor 8 **                                                   |
| <i>Fgf</i>    | Mm01131929_m1   | 7015007        | Yes        | Yes     | 0.051          | 1.734       | 0.062          | 1.909       | 0.548          | 0.832       | C-fos induced growth factor **                                                  |
| <i>Gdf10</i>  | Mm03024279_s1   | 6818153        | Yes        | No      | 0.028          | 2.334       | 0.757          | 1.086       | 0.894          | 1.060       | Growth differentiation factor 10 **                                             |
| <i>Hbegf</i>  | Mm00439305_g1   | 6864680        | Yes        | Yes     | 0.037          | 0.551       | 0.063          | 0.547       | 0.087          | 0.530       | Heparin-binding epidermal growth factor **                                      |
| <i>Hdgf</i>   | Mm00725733_s1   | 6899028        | Yes        | No      | 0.104          | 1.246       | 0.575          | 1.070       | 0.409          | 1.147       | Hepatoma-derived growth factor **                                               |
| <i>Igf1</i>   | Mm00439560_m1   | 6769597        | Yes        | No      | 0.235          | 0.631       | 0.173          | 0.537       | 0.398          | 0.641       | Insulin-like growth factor 1 **                                                 |
| <i>Igf2</i>   | Mm00439565_g1   | 6972317        | Yes        | Yes     | 0.001          | 59.615      | 0.002          | 55.864      | 0.002          | 52.364      | Insulin-like growth factor 2 **                                                 |
| <i>Nog</i>    | Mm01297833_s1   | 6790670        | Yes        | No      | 0.275          | 2.605       | 0.517          | 1.773       | 0.677          | 1.712       | Noggin **                                                                       |
| <i>Pdgfa</i>  | Mm01205760_m1   | 6942654        | Yes        | Yes     | 0.028          | 2.013       | 0.035          | 2.347       | 0.057          | 2.338       | Platelet-derived growth factor a **                                             |
| <i>Pdgfb</i>  | Mm01298578_m1   | 6837144        | Yes        | Yes     | 0.037          | 0.704       | 0.199          | 1.197       | 0.157          | 1.298       | Platelet-derived growth factor b **                                             |
| <i>Pdgfc</i>  | Mm00480205_m1   | 6898686        | Yes        | Yes     | 0.019          | 2.152       | 0.035          | 2.207       | 0.902          | 1.042       | Platelet-derived growth factor c **                                             |
| <i>Pdgfd</i>  | Mm00546829_m1   | 6986677        | Yes        | Yes     | 0.925          | 0.952       | 0.191          | 0.504       | 0.790          | 1.205       | Platelet-derived growth factor d **                                             |
| <i>Shh</i>    | Mm00436527_m1   | 6936889        | Yes        | Yes     | 0.448          | 0.595       | 0.308          | 2.117       | 0.152          | 4.571       | Sonic hedgehog **                                                               |
| <i>Tgfb1</i>  | Mm01178820_m1   | 6959236        | Yes        | Yes     | 0.106          | 0.552       | 0.241          | 0.653       | 0.975          | 0.981       | Transforming growth factor beta 1 **                                            |
| <i>Tgfb2</i>  | Mm01321739_m1   | 6764953        | Yes        | Yes     | 0.057          | 2.441       | 0.448          | 1.335       | 0.264          | 1.802       | Transforming growth factor beta 2 **                                            |
| <i>Tgfb3</i>  | Mm01307950_m1   | 6802449        | Yes        | Yes     | 0.026          | 2.386       | 0.238          | 1.408       | 0.100          | 2.077       | Transforming growth factor beta 3 **                                            |
| <i>Vegfa</i>  | Mm01281447_m1   | 6855659        | Yes        | Yes     | 0.779          | 0.875       | 0.721          | 1.174       | 0.940          | 1.061       | Vascular endothelial growth factor a **                                         |
| <i>Vegfb</i>  | Mm00442102_m1   | 6871273        | Yes        | Yes     | 0.008          | 1.461       | 0.031          | 1.318       | 0.060          | 1.277       | Vascular endothelial growth factor b **                                         |
| <i>Vegfc</i>  | Mm00437313_m1   | 6976200        | Yes        | Yes     | 0.088          | 2.120       | 0.477          | 1.316       | 0.316          | 1.700       | Vascular endothelial growth factor c **                                         |
| <i>Wnt10b</i> | Mm00442104_m1   | 6838399        | Yes        | No      | 0.629          | 1.280       | 0.120          | 2.812       | 0.240          | 2.325       | Wingless-related integration site 10b **                                        |
| <i>Wnt16</i>  | Mm00446420_m1   | 6944581        | Yes        | No      | 0.358          | 1.180       | 0.026          | 2.402       | 0.093          | 1.710       | Wingless-related integration site 16 **                                         |
| <i>Wnt2</i>   | Mm00470018_m1   | 6951974        | Yes        | No      | 0.057          | 3.047       | 0.082          | 3.260       | 0.122          | 3.219       | Wingless-related integration site 2 **                                          |
| <i>Wnt2b</i>  | Mm00437330_m1   | 6907887        | Yes        | No      | 0.009          | 2.189       | 0.024          | 2.030       | 0.077          | 1.590       | Wingless-related integration site 2b **                                         |
| <i>Wnt3a</i>  | Mm00437337_m1   | 6788662        | Yes        | No      | 0.457          | 1.199       | 0.103          | 1.728       | 0.684          | 1.159       | Wingless-related integration site 3a **                                         |
| <i>Wnt6</i>   | Mm00437353_m1   | 6750567        | Yes        | No      | 0.011          | 3.166       | 0.032          | 2.668       | 0.064          | 2.352       | Wingless-related integration site 6 **                                          |
| <i>Wnt7a</i>  | Mm00437355_m1   | 6955539        | Yes        | No      | 0.060          | 2.117       | 0.131          | 1.865       | 0.395          | 1.456       | Wingless-related integration site 7a **                                         |
| <i>Wnt7b</i>  | Mm00437357_m1   | 6837582        | Yes        | No      | 0.072          | 2.297       | 0.050          | 3.623       | 0.237          | 1.912       | Wingless-related integration site 7b **                                         |

## Putatively involved

| Gene symbol      | Taqman assay ID | Affymetrix ID | Present on |         | E14vsP90       |             | E16vsP90       |             | P1vsP90        |             | Function                                                                             |
|------------------|-----------------|---------------|------------|---------|----------------|-------------|----------------|-------------|----------------|-------------|--------------------------------------------------------------------------------------|
|                  |                 |               | Cart V1    | Cart V2 | Stepup P-value | Fold change | Stepup P-value | Fold change | Stepup P-value | Fold change |                                                                                      |
| <i>Arsa</i>      | Mm00802173_g1   | 6837827       | Yes        | Yes     | 0.445          | 0.741       | 0.876          | 0.936       | 0.710          | 0.805       | Desulfation of cerebroside                                                           |
| <i>Arsrg</i>     | Mm00546931_m1   | 6784787       | Yes        | Yes     | 0.041          | 0.616       | 0.094          | 0.665       | 0.885          | 1.043       | Paralog of Arsa                                                                      |
| <i>B3galnt1</i>  | Mm00480272_s1   | 6905897       | Yes        | No      | 0.069          | 2.109       | 0.411          | 1.331       | 0.629          | 1.269       | Transferring UDP-GalNAc or UDP-GlcNAc to N-GlcNAc, Galactose or N-GalNAc             |
| <i>B4galnt3</i>  | Mm01189804_m1   | 6956937       | Yes        | No      | 0.012          | 0.411       | 0.064          | 0.591       | 0.111          | 0.619       | Transferring UDP-GalNAc or UDP-GlcNAc to N-GlcNAc, Galactose or N-GalNAc             |
| <i>B4galnt4</i>  | Mm00625968_g1   | 6965153       | Yes        | No      | 0.018          | 3.370       | 0.519          | 1.221       | 0.739          | 1.166       | Transferring UDP-GalNAc or UDP-GlcNAc to N-GlcNAc, Galactose or N-GalNAc             |
| <i>C1galt1</i>   | Mm00473986_m1   | 6943991       | Yes        | Yes     | 0.296          | 0.634       | 0.176          | 0.494       | 0.519          | 0.674       | Transferring UDP-Gal to N-GalNAc.                                                    |
| <i>C1galt1c1</i> | Mm00480676_m1   | 7016427       | Yes        | Yes     | 0.845          | 1.117       | 0.533          | 0.727       | 0.706          | 0.753       | C1GALT1-specific chaperone 1                                                         |
| <i>Chst1</i>     | Mm00517855_m1   | 6879140       | Yes        | Yes     | 0.207          | 1.301       | 0.034          | 2.281       | 0.143          | 1.591       | Involved in sulfation of keratan sulfate                                             |
| <i>Gla</i>       | Mm00516323_m1   | 7019519       | Yes        | Yes     | 0.290          | 0.548       | 0.149          | 0.361       | 0.520          | 0.598       | Hydrolysis of galactose units                                                        |
| <i>Glb1</i>      | Mm00515342_m1   | 6992632       | Yes        | Yes     | 0.411          | 1.327       | 0.393          | 1.359       | 0.973          | 0.979       | Hydrolysis of galactose units                                                        |
| <i>Glb1l2</i>    | Mm00464245_m1   | 6994133       | Yes        | Yes     | 0.011          | 0.128       | 0.069          | 0.319       | 0.100          | 0.319       | Hydrolysis of galactose units                                                        |
| <i>Gnpda1</i>    | Mm01254913_g1   | 6864789       | Yes        | Yes     | 0.545          | 0.817       | 0.545          | 0.815       | 0.633          | 0.793       | Conversion of GlcNAc-6-P into fructose-6-P                                           |
| <i>Gnpda2</i>    | Mm00503573_m1   | 6938963       | Yes        | Yes     | 0.991          | 1.006       | 0.237          | 0.609       | 0.939          | 1.053       | Conversion of GlcNAc-6-P into fructose-6-P                                           |
| <i>Khk</i>       | Mm00434647_m1   | 6929655       | Yes        | No      | 0.424          | 0.814       | 0.427          | 0.809       | 0.739          | 1.140       | Phosphorylating fructose to fructose-1-P                                             |
| <i>Kl</i>        | Mm00502002_m1   | 6935777       | Yes        | Yes     | 0.489          | 1.055       | 0.031          | 1.411       | 0.977          | 1.004       | Putative glucuronidase                                                               |
| <i>Klb</i>       | Mm00473122_m1   | 6931257       | Yes        | Yes     | 0.013          | 0.341       | 0.988          | 0.996       | 0.113          | 1.827       | Putative glucuronidase                                                               |
| <i>Renbp</i>     | Mm00491720_m1   | 7017604       | Yes        | No      | 0.717          | 0.778       | 0.394          | 0.557       | 0.853          | 0.818       | Concersion of N-GlcNAc to N-acetylmannosamine                                        |
| <i>Slc17a5</i>   | Mm00555344_m1   | 6997114       | Yes        | Yes     | 0.013          | 0.738       | 0.028          | 0.733       | 0.165          | 0.870       | Transport of GlcA from lysosome to cytoplasm                                         |
| <i>Slc26a3</i>   | Mm00445313_m1   | 6794219       | Yes        | No      | 0.036          | 0.818       | 0.411          | 0.944       | 0.166          | 0.867       | Transferring chloride ions across the cell membrane in exchange for bicarbonate ions |
| <i>Slc26a4</i>   | Mm00442308_m1   | 6799842       | Yes        | No      | 0.042          | 0.861       | 0.153          | 1.101       | 0.368          | 0.935       | Transferring chloride ions across the cell membrane                                  |
| <i>Slc26a5</i>   | Mm00446145_m1   | 6936587       | Yes        | Yes     | 0.929          | 0.984       | 0.194          | 1.258       | 0.703          | 1.089       | Protein functions as a molecular motor in motile outer hair cells of the cochlea     |
| <i>Slc35a1</i>   | Mm00442341_m1   | 6920732       | Yes        | Yes     | 0.034          | 1.984       | 0.960          | 0.987       | 0.602          | 0.843       | Putative CMP-Sialic Acid Transporter                                                 |
| <i>Ugt8a</i>     | Mm00495930_m1   | 6909083       | Yes        | Yes     | 0.961          | 1.005       | 0.107          | 0.840       | 0.298          | 0.890       | Transferring galactose to ceramide                                                   |

\* Some genes were *not available* on the used exon array version.

**Supplementary data table 6: Differentially expressed genes found using Taqman low density arrays for the *Glce* knockout and HSP $\beta$ Tg mouse compared to wildtype.**

***Production of precursors***

| Gene symbol     | Taqman Assay ID | GLCE knockout mouse |                     |                          | HPSEtg mouse   |                     |                          | Function                                                          |                                        |
|-----------------|-----------------|---------------------|---------------------|--------------------------|----------------|---------------------|--------------------------|-------------------------------------------------------------------|----------------------------------------|
|                 |                 | Reference gene      | P-value             | Relative fold expression | Reference gene | P-value             | Relative fold expression |                                                                   |                                        |
| <i>Adpgk</i>    | Mm00511302_m1   | <i>18SRNA</i>       | 0.629               | 0.718                    | <i>Tbp</i>     | 0.409               | 0.318                    | Phosphorylation of glucose into glucose-6-P                       |                                        |
| <i>Gale</i>     | Mm00617772_g1   | <i>18SRNA</i>       | 0.742               | 0.887                    | <i>Tbp</i>     | 0.503               | 1.628                    | Conversion of UDP-GlcNAc to UDP-GalNAc                            |                                        |
| <i>Galk1</i>    | Mm00444182_m1   | <i>18SRNA</i>       | 0.700               | 0.838                    | <i>Tbp</i>     | 0.314               | 1.495                    | Phosphorylation of Galactose into Galactose-1-P                   |                                        |
| <i>Galk2</i>    | Mm00613268_m1   | <i>18SRNA</i>       | 0.552               | 0.772                    | <i>Tbp</i>     | 0.964               | 1.023                    | Phosphorylation of N-Acetylgalactosamine (GalNAc) into GalNAc-1P) |                                        |
| <i>Galt</i>     | Mm00489459_g1   | <i>18SRNA</i>       | 0.299               | 1.485                    | <i>Tbp</i>     | 0.616               | 0.744                    | UDP-activation of Glucose-1-P and Galactose-1-P                   |                                        |
| <i>Gck</i>      | Mm00439129_m1   |                     | <i>Not detected</i> |                          |                | <i>Not detected</i> |                          | Phosphorylation of glucose into glucose-6-P                       |                                        |
| <i>Gfpt1</i>    | Mm00600127_m1   | <i>18SRNA</i>       | 0.130               | 0.611                    | <i>Tbp</i>     | 0.768               | 0.800                    | Conversion of fructose-6-P into glucosamine-6-P (Glc-6-P)         |                                        |
| <i>Gfpt2</i>    | Mm00496565_m1   | <i>18SRNA</i>       | <i>0.080</i>        | <i>1.629</i>             | <i>Tbp</i>     | 0.433               | 0.701                    | Conversion of fructose-6-P into Glc-6-P                           |                                        |
| <i>Gnpnat1</i>  | Mm00834602_mH   | <i>18SRNA</i>       | <b>0.033</b>        | <b>0.468</b>             | <i>Tbp</i>     | 0.295               | 0.713                    | Conversion of Glc-6-P into N-Acetylglucosamine-6-P (GlcNAc-6-P)   |                                        |
| <i>Gpi1</i>     | Mm02026122_g1   | <i>18SRNA</i>       | 0.438               | 1.286                    | <i>ActB</i>    | 0.530               | 1.406                    | Isomerisation of glucose-6-P into fructose-6-P                    |                                        |
| <i>Hk1</i>      | Mm00439344_m1   | <i>18SRNA</i>       | 0.563               | 0.857                    | <i>Tbp</i>     | 0.475               | 0.625                    | Phosphorylation of glucose into glucose-6-P                       |                                        |
| <i>Hk2</i>      | Mm00443385_m1   | <i>18SRNA</i>       | 0.369               | 1.420                    | <i>Tbp</i>     | 0.345               | 0.342                    | Phosphorylation of glucose into glucose-6-P                       |                                        |
| <i>Miox</i>     | Mm00480214_m1   |                     | <i>Not detected</i> |                          |                | <i>Not detected</i> |                          | Conversion of Myo-inositol into UDP-GlcA                          |                                        |
| <i>Nagk</i>     | Mm00479878_m1   | <i>18SRNA</i>       | 0.554               | 0.818                    | <i>Tbp</i>     | 0.683               | 1.221                    | Phosphorylation of GlcNAc to GlcNAc-6-P                           |                                        |
| <i>Papss1</i>   | Mm00442283_m1   | <i>18SRNA</i>       | 0.319               | 0.646                    | <i>Tbp</i>     | 0.873               | 1.068                    | Synthesis of PAPS complex                                         |                                        |
| <i>Papss2</i>   | Mm00442295_m1   | <i>18SRNA</i>       | 0.100               | 0.566                    | <i>Tbp</i>     | 0.492               | 0.641                    | Synthesis of PAPS complex                                         |                                        |
| <i>Pgm1</i>     | Mm00804141_m1   | <i>18SRNA</i>       | <i>0.011</i>        | <i>0.681</i>             | <i>Tbp</i>     | 0.145               | 0.292                    | Conversion of glucose-6-P into glucose-1-P                        |                                        |
| <i>Pgm2</i>     | Mm00728285_s1   | <i>18SRNA</i>       | 0.114               | 2.758                    | <i>ActB</i>    | 0.977               | 1.034                    | Conversion of glucose-6-P into glucose-1-P                        |                                        |
| <i>Pgm3</i>     | Mm00459270_m1   | <i>18SRNA</i>       | 0.210               | 0.631                    | <i>Tbp</i>     | 0.763               | 0.840                    | Conversion of GlcNAc-6-P into GlcNAc-1-P                          |                                        |
| <i>Pgm5</i>     | Mm00723432_m1   | <i>18SRNA</i>       | 0.703               | 0.867                    | <i>Tbp</i>     | 0.617               | 0.596                    | Conversion of glucose-6-P into glucose-1-P                        |                                        |
| <i>Slc13a1</i>  | Mm00490339_m1   |                     | <i>Not detected</i> |                          |                | <i>Not detected</i> |                          | Transport of sulphate from the extracellular space to cytoplasm   |                                        |
| <i>Slc13a4</i>  | Mm00556495_m1   |                     | <i>Not detected</i> |                          |                | <i>Not detected</i> |                          | Transport of sulphate from the extracellular space to cytoplasm   |                                        |
| <i>Slc13a5</i>  | Mm01334459_m1   |                     | <i>Not detected</i> |                          |                | <i>Not detected</i> |                          | Transport of sulphate from the extracellular space to cytoplasm   |                                        |
| <i>Slc26a11</i> | Mm00626632_m1   | <i>18SRNA</i>       | 0.762               | 1.069                    | <i>Tbp</i>     | 0.679               | 1.511                    | Transport of sulphate from the extracellular space to cytoplasm   |                                        |
| <i>Slc26a2</i>  | Mm00432896_m1   |                     | <i>Not detected</i> |                          |                | <i>Not detected</i> |                          | Transport of sulphate from the extracellular space to cytoplasm   |                                        |
| <i>Slc26a6</i>  | Mm00506742_m1   | <i>18SRNA</i>       | 0.803               | 0.953                    | <i>Tbp</i>     | 0.236               | 2.217                    | Transport of sulphate from the extracellular space to cytoplasm   |                                        |
| <i>Slc26a7</i>  | Mm00524162_m1   | <i>18SRNA</i>       | 0.269               | 0.465                    | <i>Tbp</i>     | 0.751               | 1.509                    | Transport of sulphate from the extracellular space to cytoplasm   |                                        |
| <i>Slc26a8</i>  | Mm00524836_m1   |                     | <i>Not detected</i> |                          |                | <i>Not detected</i> |                          | Transport of sulphate from the extracellular space to cytoplasm   |                                        |
| <i>Slc26a9</i>  | Mm00628490_m1   | <i>18SRNA</i>       | 0.726               | 0.898                    |                | <i>Not detected</i> |                          | Transport of sulphate from the extracellular space to cytoplasm   |                                        |
| <i>Slc2a1</i>   | Mm01192270_m1   | <i>18SRNA</i>       | 0.413               | 1.423                    | <i>Tbp</i>     | 0.439               | 0.476                    | Sugar transport across plasma membrane                            |                                        |
| <i>Slc2a10</i>  | Mm00453716_m1   | <i>18SRNA</i>       | 0.684               | 0.619                    | <i>Tbp</i>     | 0.927               | 0.912                    | Sugar transport across plasma membrane                            |                                        |
| <i>Slc2a12</i>  | Mm00619244_m1   | <i>18SRNA</i>       | 0.888               | 1.072                    | <i>Tbp</i>     | 0.872               | 0.820                    | Sugar transport across plasma membrane                            |                                        |
| <i>Slc2a2</i>   | Mm00446230_g1   |                     | <i>Not detected</i> |                          |                | <i>Not detected</i> |                          | Sugar transport across plasma membrane                            |                                        |
| <i>Slc2a3</i>   | Mm00441483_m1   | <i>18SRNA</i>       | 0.581               | 1.493                    |                | <i>Not detected</i> |                          | Sugar transport across plasma membrane                            |                                        |
| <i>Slc2a4</i>   | Mm01245507_g1   | <i>18SRNA</i>       | 0.086               | 2.526                    | <i>Tbp</i>     | 0.656               | 0.540                    | Sugar transport across plasma membrane                            |                                        |
| <i>Slc2a5</i>   | Mm00600311_m1   |                     | <i>Not detected</i> |                          |                | <i>Tbp</i>          | 0.961                    | 1.065                                                             | Sugar transport across plasma membrane |
| <i>Slc2a6</i>   | Mm00554217_m1   | <i>18SRNA</i>       | 0.553               | 0.596                    | <i>Tbp</i>     | 0.892               | 0.875                    | Sugar transport across plasma membrane                            |                                        |
| <i>Slc2a8</i>   | Mm00444634_m1   | <i>18SRNA</i>       | <i>0.078</i>        | <i>1.981</i>             | <i>Tbp</i>     | 0.411               | 0.435                    | Sugar transport across plasma membrane                            |                                        |
| <i>Slc2a9</i>   | Mm01211147_m1   | <i>18SRNA</i>       | 0.185               | 0.499                    | <i>Tbp</i>     | 0.775               | 1.122                    | Sugar transport across plasma membrane                            |                                        |



|                |               |               |                     |       |            |                     |       |                                                                          |
|----------------|---------------|---------------|---------------------|-------|------------|---------------------|-------|--------------------------------------------------------------------------|
| <i>Slc35a2</i> | Mm00446504_m1 | <i>18SRNA</i> | 0.600               | 0.867 | <i>Tbp</i> | 0.992               | 1.008 | Transport from cytoplasm to Golgi system of UDP-GalNAc and UDP-Galactose |
| <i>Slc35a3</i> | Mm00523288_m1 | <i>18SRNA</i> | 0.240               | 0.584 | <i>Tbp</i> | 0.408               | 0.502 | Transport from cytoplasm to Golgi system of UDP-GlcNAc                   |
| <i>Slc35a4</i> | Mm00782997_s1 | <i>18SRNA</i> | 0.600               | 1.277 | <i>Tbp</i> | 0.527               | 1.312 | Transport from cytoplasm to Golgi system of UDP-GalNAc and UDP-Galactose |
| <i>Slc35b1</i> | Mm00450258_m1 | <i>18SRNA</i> | 0.615               | 0.879 | <i>Tbp</i> | 0.883               | 1.067 | Transport from cytoplasm to Golgi system of UDP-GalNAc and UDP-Galactose |
| <i>Slc35b2</i> | Mm01269910_m1 | <i>18SRNA</i> | 0.912               | 0.970 | <i>Tbp</i> | 0.388               | 0.661 | Transport of PAPS complexes from cytoplasm to Golgi system               |
| <i>Slc35b3</i> | Mm00506268_m1 | <i>18SRNA</i> | 0.299               | 0.337 | <i>Tbp</i> | 0.256               | 2.218 | Transport of PAPS complexes from cytoplasm to Golgi system               |
| <i>Slc35b4</i> | Mm00480588_m1 | <i>18SRNA</i> | 0.074               | 0.507 | <i>Tbp</i> | 0.437               | 0.391 | Transport from cytoplasm to Golgi system of UDP-GlcNAc and UDP-Xylose    |
| <i>Slc35d1</i> | Mm00624959_m1 | <i>18SRNA</i> | 0.153               | 0.738 | <i>Tbp</i> | 0.868               | 1.097 | Transport from cytoplasm to Golgi system of UDP-GalNAc and UDP-GlcA      |
| <i>Slc35d2</i> | Mm01304830_m1 | <i>18SRNA</i> | 0.971               | 0.975 | <i>Tbp</i> | 0.406               | 1.235 | Transport from cytoplasm to Golgi system of UDP-GlcNAc                   |
| <i>Slc35d3</i> | Mm01717003_m1 |               | <i>Not detected</i> |       |            | <i>Not detected</i> |       | Paralog of <i>Slc35d1</i>                                                |
| <i>Uap1</i>    | Mm00769477_m1 | <i>18SRNA</i> | 0.777               | 1.107 | <i>Tbp</i> | 0.952               | 1.043 | UDP-activation of GlcNAc-1-P and GalNAc-1-P                              |
| <i>Ugdh</i>    | Mm00447643_m1 | <i>18SRNA</i> | 0.499               | 0.682 | <i>Tbp</i> | 0.578               | 1.451 | Conversion of UDP-glucose into UDP-glucuronic acid (UDP-GlcA)            |
| <i>Ugp2</i>    | Mm00454826_m1 | <i>18SRNA</i> | 0.650               | 0.848 | <i>Tbp</i> | 0.979               | 1.021 | UDP-activation of Glucose-1-P                                            |
| <i>Uxs1</i>    | Mm00550735_m1 | <i>18SRNA</i> | 0.163               | 0.584 | <i>Tbp</i> | 0.577               | 0.825 | Conversion of UDP-GlcA into UDP-xylose                                   |

## Core proteins

| Gene symbol    | Taqman Assay ID | GLCE knockout mouse |                     |                          | HPSEtg mouse   |                     |                          | Function                                                        |
|----------------|-----------------|---------------------|---------------------|--------------------------|----------------|---------------------|--------------------------|-----------------------------------------------------------------|
|                |                 | Reference gene      | P-value             | Relative fold expression | Reference gene | P-value             | Relative fold expression |                                                                 |
| <i>Acan</i>    | Mm00545807_m1   | <i>18SRNA</i>       | <b>0.005</b>        | <b>0.242</b>             | <i>Tbp</i>     | <b>0.055</b>        | <b>2.478</b>             | Proteoglycan carrying CS or DS                                  |
| <i>Agrn</i>    | Mm01264855_m1   | <i>18SRNA</i>       | 0.639               | 0.885                    | <i>Tbp</i>     | 0.834               | 1.145                    | Proteoglycan carrying HS present in ECM                         |
| <i>Aspn</i>    | Mm00445945_m1   | <i>18SRNA</i>       | <b>0.010</b>        | <b>0.382</b>             | <i>Tbp</i>     | 0.704               | 0.709                    | Proteoglycan carrying CS or DS                                  |
| <i>Bcan</i>    | Mm00476090_m1   |                     | <i>Not detected</i> |                          |                | <i>Not detected</i> |                          | Proteoglycan carrying CS or DS                                  |
| <i>Bgn</i>     | Mm00455918_m1   | <i>18SRNA</i>       | 0.721               | 0.802                    | <i>Tbp</i>     | 0.564               | 0.640                    | Proteoglycan carrying CS or DS                                  |
| <i>Cd44</i>    | Mm01277164_m1   | <i>18SRNA</i>       | 0.337               | 0.567                    | <i>Tbp</i>     | 0.609               | 0.818                    | Proteoglycan carrying HS and hyaluronic acid on cell surface    |
| <i>Col18a1</i> | Mm00487131_m1   | <i>18SRNA</i>       | 0.893               | 1.029                    | <i>Tbp</i>     | 0.344               | 0.563                    | Proteoglycan carrying HS present in basement membrane           |
| <i>Col9a2</i>  | Mm00483872_m1   | <i>18SRNA</i>       | 0.444               | 2.241                    |                | <i>Not detected</i> |                          | Proteoglycan carrying CS or DS                                  |
| <i>Cspg4</i>   | Mm00507256_m1   | <i>18SRNA</i>       | 0.707               | 0.870                    | <i>Tbp</i>     | 0.718               | 0.740                    | Proteoglycan carrying CS or DS                                  |
| <i>Cspg5</i>   | Mm00516549_m1   | <i>18SRNA</i>       | 0.469               | 0.670                    | <i>Tbp</i>     | 0.369               | 0.001                    | Proteoglycan carrying CS or DS                                  |
| <i>Dcn</i>     | Mm03003496_s1   | <i>18SRNA</i>       | 0.561               | 0.680                    | <i>ActB</i>    | 0.517               | 1.547                    | Proteoglycan carrying CS or DS                                  |
| <i>Epyc</i>    | Mm00514611_m1   |                     | <i>Not detected</i> |                          |                | <i>Not detected</i> |                          | Proteoglycan carrying CS or DS                                  |
| <i>Gpc1</i>    | Mm00497305_m1   | <i>18SRNA</i>       | 0.662               | 0.855                    | <i>Tbp</i>     | 0.326               | 0.373                    | Proteoglycan carrying HS present on cell surface via GPI-anchor |
| <i>Gpc2</i>    | Mm00549650_m1   | <i>18SRNA</i>       | 0.959               | 0.960                    |                | <i>Not detected</i> |                          | Proteoglycan carrying HS present on cell surface via GPI-anchor |
| <i>Gpc3</i>    | Mm00516722_m1   | <i>18SRNA</i>       | 0.740               | 0.883                    | <i>Tbp</i>     | 0.876               | 1.086                    | Proteoglycan carrying HS present on cell surface via GPI-anchor |
| <i>Gpc4</i>    | Mm00515035_m1   | <i>18SRNA</i>       | 0.517               | 0.777                    | <i>Tbp</i>     | 0.516               | 0.708                    | Proteoglycan carrying HS present on cell surface via GPI-anchor |
| <i>Gpc5</i>    | Mm00615599_m1   |                     | <i>Not detected</i> |                          |                |                     |                          | Proteoglycan carrying HS present on cell surface via GPI-anchor |
| <i>Gpc6</i>    | Mm00516235_m1   | <i>18SRNA</i>       | 0.140               | 0.628                    | <i>Tbp</i>     | 0.345               | 0.605                    | Proteoglycan carrying HS present on cell surface via GPI-anchor |
| <i>Hmmr</i>    | Mm00469183_m1   | <i>18SRNA</i>       | 0.271               | 0.507                    | <i>Tbp</i>     | 0.230               | 0.739                    | Hyaluronan-Mediated Motility Receptor                           |
| <i>Hspg2</i>   | Mm01181165_m1   | <i>18SRNA</i>       | 0.934               | 1.029                    | <i>Tbp</i>     | 0.629               | 0.679                    | Proteoglycan carrying HS present in ECM                         |
| <i>Ncan</i>    | Mm00484007_m1   |                     | <i>Not detected</i> |                          |                | <i>Not detected</i> |                          | Proteoglycan carrying CS or DS                                  |
| <i>Sdc1</i>    | Mm00448918_m1   | <i>18SRNA</i>       | 0.435               | 0.691                    | <i>Tbp</i>     | 0.448               | 0.452                    | Proteoglycan carrying HS present on cell surface                |
| <i>Sdc2</i>    | Mm00484718_m1   | <i>18SRNA</i>       | 0.145               | 0.624                    | <i>Tbp</i>     | 0.909               | 0.929                    | Proteoglycan carrying HS present on cell surface                |
| <i>Sdc3</i>    | Mm01179831_m1   | <i>18SRNA</i>       | 0.851               | 1.065                    | <i>Tbp</i>     | 0.534               | 0.682                    | Proteoglycan carrying HS present on cell surface                |
| <i>Sdc4</i>    | Mm00488527_m1   | <i>18SRNA</i>       | 0.513               | 0.779                    | <i>ActB</i>    | 0.032               | 1.291                    | Proteoglycan carrying HS present on cell surface                |
| <i>Smc3</i>    | Mm00484015_m1   | <i>18SRNA</i>       | 0.681               | 0.692                    | <i>Tbp</i>     | 0.788               | 1.244                    | Proteoglycan carrying CS or DS                                  |
| <i>Srgn</i>    | Mm01169070_m1   | <i>18SRNA</i>       | 0.417               | 0.680                    | <i>Tbp</i>     | 0.809               | 0.846                    | Proteoglycan carrying CS or DS                                  |
| <i>Vcan</i>    | Mm01283063_m1   | <i>18SRNA</i>       | 0.928               | 1.023                    | <i>Tbp</i>     | 0.641               | 0.875                    | Proteoglycan carrying CS or DS                                  |

## Preparation of linkage region

| Gene symbol    | Taqman Assay ID | GLCE knockout mouse |                     |                          | HPSEtg mouse   |                     |                          | Function                                                            |
|----------------|-----------------|---------------------|---------------------|--------------------------|----------------|---------------------|--------------------------|---------------------------------------------------------------------|
|                |                 | Reference gene      | P-value             | Relative fold expression | Reference gene | P-value             | Relative fold expression |                                                                     |
| <i>B3galt6</i> | Mm00504458_s1   | <i>18SRNA</i>       | 0.472               | 0.688                    | <i>Tbp</i>     | 0.291               | 0.630                    | Transferring UDP-galactose to galactose-xylose on proteoglycan      |
| <i>B3gat1</i>  | Mm00661499_m1   |                     | <i>Not detected</i> |                          |                | <i>Not detected</i> |                          | Transferring UDP-GlcA to galactose-galactose-xylose on proteoglycan |
| <i>B3gat2</i>  | Mm00549042_m1   |                     | <i>Not detected</i> |                          |                | <i>Not detected</i> |                          | Transferring UDP-GlcA to galactose-galactose-xylose on proteoglycan |
| <i>B3gat3</i>  | Mm00470389_m1   | <i>18SRNA</i>       | 0.287               | 1.317                    | <i>Tbp</i>     | 0.755               | 0.850                    | Transferring UDP-GlcA to galactose-galactose-xylose on proteoglycan |
| <i>B4galt2</i> | Mm00479556_m1   | <i>18SRNA</i>       | 0.865               | 0.948                    | <i>Tbp</i>     | 0.858               | 0.913                    | Transferring UDP-galactose to GlcNAc, Glc, and Xyl.                 |
| <i>B4galt7</i> | Mm00461357_m1   | <i>18SRNA</i>       | 0.989               | 1.004                    | <i>Tbp</i>     | 0.834               | 0.816                    | Transferring UDP-galactose to xylose on proteoglycan                |
| <i>Xylt1</i>   | Mm00558690_m1   | <i>18SRNA</i>       | 0.976               | 0.982                    | <i>Tbp</i>     | 0.990               | 1.007                    | Transferring UDP-xylose to proteoglycan                             |
| <i>Xylt2</i>   | Mm00461181_m1   | <i>18SRNA</i>       | 0.814               | 0.957                    | <i>Tbp</i>     | 0.879               | 0.912                    | Transferring UDP-xylose to proteoglycan                             |

## Glycosaminoglycan chain polymerisation

| Gene symbol       | Taqman Assay ID | GLCE knockout mouse |              |                          | HPSEtg mouse   |                     |                          | Function                                                   |
|-------------------|-----------------|---------------------|--------------|--------------------------|----------------|---------------------|--------------------------|------------------------------------------------------------|
|                   |                 | Reference gene      | P-value      | Relative fold expression | Reference gene | P-value             | Relative fold expression |                                                            |
| <i>Chpf</i>       | Mm01262239_g1   | <i>18SRNA</i>       | 0.711        | 1.153                    | <i>Tbp</i>     | 0.941               | 0.942                    | Transferring UDP-GlcA to GalNAc at end of sugar chain (CS) |
| <i>Chsy1</i>      | Mm01319178_m1   | <i>18SRNA</i>       | 0.983        | 1.005                    | <i>Tbp</i>     | 0.944               | 1.022                    | Transferring UDP-GlcA to GalNAc at end of sugar chain (CS) |
| <i>Chsy3</i>      | Mm01545329_m1   | <i>18SRNA</i>       | 0.995        | 0.997                    | <i>Tbp</i>     | 0.869               | 1.086                    | Transferring UDP-GlcA to GalNAc at end of sugar chain (CS) |
| <i>Csgalnact1</i> | Mm00555164_m1   | <i>18SRNA</i>       | 0.661        | 0.783                    | <i>Tbp</i>     | 0.203               | 0.506                    | Transferring UDP-GalNAc to GlcA at end of sugar chain (CS) |
| <i>Csgalnact2</i> | Mm00513340_m1   | <i>18SRNA</i>       | <b>0.049</b> | <b>0.431</b>             | <i>Tbp</i>     | 0.845               | 0.858                    | Transferring UDP-GalNAc to GlcA at end of sugar chain (CS) |
| <i>Ext1</i>       | Mm00468769_m1   | <i>18SRNA</i>       | 0.590        | 0.826                    | <i>Tbp</i>     | 0.943               | 1.024                    | Transferring UDP-GlcNAc to GlcA at end of sugar chain (HS) |
| <i>Ext2</i>       | Mm00468775_m1   | <i>18SRNA</i>       | 0.634        | 0.852                    | <i>Tbp</i>     | 0.579               | 0.626                    | Transferring UDP-GlcNAc to GlcA at end of sugar chain (HS) |
| <i>Extl1</i>      | Mm00621977_s1   | <i>18SRNA</i>       | 0.519        | 1.269                    | <i>Tbp</i>     | 0.347               | 1.426                    | Transferring UDP-GlcA to GlcNAc at end of sugar chain (HS) |
| <i>Extl2</i>      | Mm00469621_m1   | <i>18SRNA</i>       | 0.377        | 0.703                    | <i>Tbp</i>     | 0.819               | 0.773                    | Transferring UDP-GlcA to GlcNAc at end of sugar chain (HS) |
| <i>Extl3</i>      | Mm00516994_m1   | <i>18SRNA</i>       | 0.467        | 0.825                    | <i>Tbp</i>     | 0.318               | 0.482                    | Transferring UDP-GlcA to GlcNAc at end of sugar chain (HS) |
| <i>Has1</i>       | Mm00468496_m1   | <i>18SRNA</i>       | 0.996        | 0.999                    | <i>Tbp</i>     | 0.395               | 0.000                    | Polymerisation of hyaluronic acid                          |
| <i>Has2</i>       | Mm00515089_m1   | <i>18SRNA</i>       | 0.158        | 0.538                    | <i>Tbp</i>     | 0.900               | 0.871                    | Polymerisation of hyaluronic acid                          |
| <i>Has3</i>       | Mm00515091_m1   | <i>18SRNA</i>       | 0.800        | 0.745                    |                | <i>Not detected</i> |                          | Polymerisation of hyaluronic acid                          |

## Glycosaminoglycan chain modification

| Gene symbol     | Taqman Assay ID | GLCE knockout mouse |                     |                          | HPSEtg mouse   |                     |                          | Function                                                                                  |
|-----------------|-----------------|---------------------|---------------------|--------------------------|----------------|---------------------|--------------------------|-------------------------------------------------------------------------------------------|
|                 |                 | Reference gene      | P-value             | Relative fold expression | Reference gene | P-value             | Relative fold expression |                                                                                           |
| <i>Chst11</i>   | Mm00517563_m1   | <i>18SRNA</i>       | 0.273               | 0.815                    | <i>Tbp</i>     | 0.789               | 0.794                    | Sulfation at the 4-O position of GalNAc units (CS)                                        |
| <i>Chst12</i>   | Mm00546416_s1   | <i>18SRNA</i>       | 0.593               | 1.273                    | <i>Tbp</i>     | 0.938               | 0.948                    | Sulfation at the 4-O position of GalNAc units (CS)                                        |
| <i>Chst13</i>   | Mm01186255_s1   |                     | <i>Not detected</i> |                          |                | <i>Not detected</i> |                          | Sulfation at the 4-O position of GalNAc units (CS)                                        |
| <i>Chst14</i>   | Mm00511291_s1   | <i>18SRNA</i>       | 0.633               | 0.812                    | <i>Tbp</i>     | 0.784               | 1.146                    | Sulfation at the 4-O position of GalNAc units (CS)                                        |
| <i>Chst15</i>   | Mm00513227_m1   | <i>18SRNA</i>       | 0.946               | 0.982                    | <i>Tbp</i>     | 0.560               | 0.555                    | Sulfation at the 6-O position of GalNAc units (CS)                                        |
| <i>Chst2</i>    | Mm00490018_g1   | <i>18SRNA</i>       | 0.774               | 1.228                    | <i>Tbp</i>     | 0.692               | 1.809                    | Sulfation at the 6-O position of GalNAc units (CS)                                        |
| <i>Chst3</i>    | Mm00489736_m1   | <i>18SRNA</i>       | 0.674               | 1.266                    | <i>Tbp</i>     | 0.864               | 0.784                    | Sulfation at the 6-O position of GalNAc units (CS)                                        |
| <i>Chst5</i>    | Mm00517342_m1   |                     | <i>Not detected</i> |                          |                | <i>Not detected</i> |                          | Sulfation at the 6-O position of GalNAc units (CS)                                        |
| <i>Chst7</i>    | Mm00491466_m1   | <i>18SRNA</i>       | 0.952               | 1.030                    | <i>Tbp</i>     | 0.991               | 1.011                    | Sulfation at the 6-O position of GalNAc units (CS)                                        |
| <i>Chst8</i>    | Mm00558321_m1   | <i>18SRNA</i>       | 0.737               | 0.805                    |                | <i>Not detected</i> |                          | Sulfation at the 4-O position of GalNAc units (CS)                                        |
| <i>Chst9</i>    | Mm01722279_m1   |                     | <i>Not detected</i> |                          |                | <i>Not detected</i> |                          | Sulfation at the 4-O position of GalNAc units (CS)                                        |
| <i>Dse</i>      | Mm00552923_m1   | <i>18SRNA</i>       | 0.249               | 0.566                    | <i>Tbp</i>     | 0.454               | 0.559                    | Epimerisation of GlcA unit into iduronic acid unit (IdoA) (CS)                            |
| <i>Glce</i>     | Mm00473667_m1   | <i>18SRNA</i>       | <b>0.013</b>        | <b>0.079</b>             | <i>Tbp</i>     | 0.550               | 0.700                    | Epimerisation of GlcA unit into iduronic acid unit (IdoA) (HS)                            |
| <i>Hs2st1</i>   | Mm00478684_m1   | <i>18SRNA</i>       | 0.072               | 0.530                    | <i>Tbp</i>     | 0.605               | 0.803                    | Sulfation at the 2-O position of GlcA and IdoA units (HS)                                 |
| <i>Hs3st1</i>   | Mm01964038_s1   | <i>18SRNA</i>       | 0.019               | 0.571                    | <i>Tbp</i>     | 0.335               | 0.679                    | Sulfation at the 3-O position of GlcNAc and GlcNS units sulfated at the 6-O position (HS) |
| <i>Hs3st2</i>   | Mm00616933_m1   |                     | <i>Not detected</i> |                          |                | <i>Not detected</i> |                          | Sulfation at the 3-O position of GlcNAc and GlcNS units sulfated at the 6-O position (HS) |
| <i>Hs3st3a1</i> | Mm00780907_s1   | <i>18SRNA</i>       | 0.032               | 1.742                    | <i>Tbp</i>     | 0.868               | 1.108                    | Sulfation at the 3-O position of GlcNAc and GlcNS units sulfated at the 6-O position (HS) |
| <i>Hs3st3b1</i> | Mm00479621_m1   | <i>18SRNA</i>       | 0.673               | 0.883                    | <i>Tbp</i>     | 0.672               | 0.675                    | Sulfation at the 3-O position of GlcNAc and GlcNS units sulfated at the 6-O position (HS) |
| <i>Hs3st5</i>   | Mm01192940_m1   |                     | <i>Not detected</i> |                          |                | <i>Not detected</i> |                          | Sulfation at the 3-O position of GlcNAc and GlcNS units sulfated at the 6-O position (HS) |
| <i>Hs3st6</i>   | Mm01299930_m1   | <i>18SRNA</i>       | 0.409               | 0.655                    | <i>Tbp</i>     | 0.174               | 1.727                    | Sulfation at the 3-O position of GlcNAc and GlcNS units sulfated at the 6-O position (HS) |
| <i>Hs6st1</i>   | Mm01229698_s1   | <i>18SRNA</i>       | 0.981               | 0.983                    | <i>Tbp</i>     | 0.791               | 1.076                    | Sulfation at the 6-O position of GlcNAc and N-sulfated-glucuronic acid units (GlcNS) (HS) |
| <i>Hs6st2</i>   | Mm00479296_m1   | <i>18SRNA</i>       | 0.492               | 1.316                    | <i>Tbp</i>     | 0.309               | 0.606                    | Sulfation at the 6-O position of GlcNAc and GlcNS units (HS)                              |
| <i>Hs6st3</i>   | Mm00479297_m1   |                     | <i>Not detected</i> |                          |                | <i>Not detected</i> |                          | Sulfation at the 6-O position of GlcNAc and GlcNS units (HS)                              |
| <i>Ndst1</i>    | Mm00447005_m1   | <i>18SRNA</i>       | 0.445               | 0.831                    | <i>Tbp</i>     | 0.420               | 0.507                    | N-de-acetylation and N-sulfation of GlcNAc unit (HS)                                      |
| <i>Ndst2</i>    | Mm00447818_m1   | <i>18SRNA</i>       | 0.916               | 1.052                    | <i>Tbp</i>     | 0.643               | 0.689                    | N-de-acetylation and N-sulfation of GlcNAc unit (HS)                                      |
| <i>Ndst3</i>    | Mm00453178_m1   | <i>18SRNA</i>       | 0.773               | 0.877                    | <i>Tbp</i>     | 0.503               | 2.028                    | N-de-acetylation and N-sulfation of GlcNAc unit (HS)                                      |
| <i>Ndst4</i>    | Mm00480767_m1   |                     | <i>Not detected</i> |                          |                | <i>Not detected</i> |                          | N-de-acetylation and N-sulfation of GlcNAc unit (HS)                                      |
| <i>Sulf1</i>    | Mm00552283_m1   | <i>18SRNA</i>       | 0.324               | 1.358                    | <i>Tbp</i>     | 0.883               | 1.140                    | Desulfation of the 6-O position of 6-O sulfated GlcNAc and GlcNS units (HS)               |
| <i>Sulf2</i>    | Mm01248026_m1   | <i>18SRNA</i>       | 0.380               | 0.642                    | <i>Tbp</i>     | 0.770               | 1.107                    | Desulfation of the 6-O position of 6-O sulfated GlcNAc and GlcNS units (HS)               |
| <i>Sumf1</i>    | Mm00461213_m1   | <i>18SRNA</i>       | 0.311               | 0.638                    | <i>Tbp</i>     | 0.758               | 0.859                    | Cofactor for Sulf1 and Sulf 2 (HS)                                                        |
| <i>Sumf2</i>    | Mm01197721_m1   | <i>18SRNA</i>       | 0.993               | 1.004                    | <i>Tbp</i>     | 0.763               | 0.850                    | Cofactor for Sulf1 and Sulf 2 (HS)                                                        |
| <i>Ust</i>      | Mm00616790_m1   | <i>18SRNA</i>       | 0.447               | 0.684                    | <i>Tbp</i>     | 0.754               | 1.382                    | Sulfation at the 2-O position of GlcA and IdoA units (CS)                                 |

## Glycosaminoglycan chain degradation

| Gene symbol       | Taqman Assay ID | GLCE knockout mouse |                     |                          | HPSEtg mouse        |                     |                          | Function                                                                            |
|-------------------|-----------------|---------------------|---------------------|--------------------------|---------------------|---------------------|--------------------------|-------------------------------------------------------------------------------------|
|                   |                 | Reference gene      | P-value             | Relative fold expression | Reference gene      | P-value             | Relative fold expression |                                                                                     |
| <i>Arsb</i>       | Mm00503655_s1   | <i>18SRNA</i>       | 0.840               | 0.904                    | <i>Tbp</i>          | 0.703               | 1.340                    | Desulfation of the 4-O position of 4-O sulfated GalNAc units (CS)                   |
| <i>Arsj</i>       | Mm00557970_m1   | <i>18SRNA</i>       | 0.788               | 0.916                    |                     | <i>Not detected</i> |                          | Desulfation of the 4-O position of 4-O sulfated GalNAc units (CS)                   |
| <i>Arsk</i>       | Mm00513099_m1   | <i>18SRNA</i>       | 0.417               | 0.556                    | <i>Tbp</i>          | 0.776               | 1.330                    | Desulfation of proteoglycans, paralog of IDS                                        |
| <i>Galns</i>      | Mm00489576_m1   | <i>18SRNA</i>       | 0.795               | 0.920                    | <i>Tbp</i>          | 0.589               | 0.566                    | Desulfation of the 6-O position of 6-O sulfated GalNAc units (CS)                   |
| <i>Gns</i>        | Mm00659592_m1   | <i>18SRNA</i>       | 0.889               | 0.935                    | <i>Tbp</i>          | 0.572               | 0.657                    | Desulfation of the 6-O position of 6-O sulfated GlcNAc and GlcNS units (HS)         |
| <i>Gusb</i>       | Mm01197698_m1   | <i>18SRNA</i>       | 0.404               | 0.747                    | <i>Tbp</i>          | 0.876               | 0.886                    | Hydrolysis of GlcA from sugar chain (HS and Hyaluronic acid and CS)                 |
| <i>Hexa</i>       | Mm00599877_m1   | <i>18SRNA</i>       | 0.850               | 0.894                    | <i>Tbp</i>          | 0.667               | 1.542                    | Hydrolysis of GalNAc units (CS) and GlcNAc units (hyaluronic acid) from sugar chain |
| <i>Hexb</i>       | Mm00599880_m1   | <i>18SRNA</i>       | 0.536               | 0.831                    | <i>Tbp</i>          | 0.251               | 0.591                    | Hydrolysis of GalNAc units (CS) and GlcNAc units (hyaluronic acid) from sugar chain |
| <i>Hgsnat</i>     | Mm00519485_m1   | <i>18SRNA</i>       | 0.850               | 1.077                    | <i>Tbp</i>          | 0.717               | 0.869                    | Acetylation of desulfated GlcNS units (HS)                                          |
| <i>Hpse</i>       | Mm00461768_m1   | <i>18SRNA</i>       | 0.622               | 0.850                    | <i>Tbp</i>          | 0.310               | 0.479                    | Degradation of HS chains extracellularly                                            |
| <i>Hyal2</i>      | Mm00477731_m1   | <i>18SRNA</i>       | 0.936               | 1.040                    | <i>Tbp</i>          | 0.411               | 0.429                    | Degradation of hyaluronic acid chain                                                |
| <i>Hyal3</i>      | Mm00662097_m1   |                     | <i>Not detected</i> |                          | <i>Not detected</i> |                     |                          | Degradation of hyaluronic acid chain                                                |
| <i>Ids</i>        | Mm00494868_m1   | <i>18SRNA</i>       | 0.880               | 0.949                    | <i>Tbp</i>          | 0.433               | 0.497                    | Desulfation of 2-O sulfated IdoA and GlcA units (HS and CS)                         |
| <i>Idua</i>       | Mm00515143_m1   | <i>18SRNA</i>       | 0.662               | 1.309                    | <i>Tbp</i>          | 0.512               | 0.535                    | Hydrolysis of IdoA unit from sugar chain (HS and CS)                                |
| <i>Mgea5</i>      | Mm00452409_m1   | <i>18SRNA</i>       | 0.287               | 0.687                    | <i>Tbp</i>          | 0.525               | 0.633                    | Degradation of hyaluronic acid chain                                                |
| <i>Naga</i>       | Mm00476274_m1   | <i>18SRNA</i>       | 0.562               | 1.215                    | <i>Tbp</i>          | 0.802               | 0.877                    | Hydrolysis N-GalNAc moieties from glycoconjugates.                                  |
| <i>Naglu</i>      | Mm00479175_m1   | <i>18SRNA</i>       | 0.820               | 0.880                    | <i>Tbp</i>          | 0.462               | 0.393                    | Hydrolysis of GlcNAc from sugar chain (HS)                                          |
| <i>Nat6;Hyal1</i> | Mm00480053_m1   | <i>18SRNA</i>       | 0.743               | 0.871                    | <i>Tbp</i>          | 0.444               | 0.440                    | Degradation of hyaluronic acid chain                                                |
| <i>Sgsh</i>       | Mm00450747_m1   | <i>18SRNA</i>       | 0.400               | 0.715                    | <i>Tbp</i>          | 0.297               | 0.524                    | Desulfation of GlcNS units (HS)                                                     |

## Growth factors

| Gene symbol  | Taqman Assay ID | GLCE knockout mouse |              |                          | HPSEtg mouse   |         |                          | Function                                                                        |
|--------------|-----------------|---------------------|--------------|--------------------------|----------------|---------|--------------------------|---------------------------------------------------------------------------------|
|              |                 | Reference gene      | P-value      | Relative fold expression | Reference gene | P-value | Relative fold expression |                                                                                 |
| <i>Ctgf</i>  | Mm01192933_g1   | 18SRNA              | 0.172        | 0.508                    | <i>Tbp</i>     | 0.693   | 0.810                    | Connective tissue growth factor, embryonic growth factor in skin development ** |
| <i>Fgf10</i> | Mm00433275_m1   | 18SRNA              | 0.121        | 1.291                    | <i>Tbp</i>     | 0.606   | 0.797                    | Fibroblast growth factor 10 **                                                  |
| <i>Fgf2</i>  | Mm01285715_m1   | 18SRNA              | 0.139        | 0.908                    | <i>Tbp</i>     | 0.983   | 0.980                    | Fibroblast growth factor 2 **                                                   |
| <i>Fgf4</i>  | Mm00438917_m1   |                     | Not detected |                          | Not detected   |         |                          | Growth factor (Uijtewilligen et al, 2013)**                                     |
| <i>Fgf7</i>  | Mm00433291_m1   | 18SRNA              | 0.151        | 0.725                    | <i>Tbp</i>     | 0.539   | 0.681                    | Fibroblast growth factor 7 **                                                   |
| <i>Fgf8</i>  | Mm00438921_m1   |                     | Not detected |                          | Not detected   |         |                          | Fibroblast growth factor 8 **                                                   |
| <i>Figf</i>  | Mm01131929_m1   | 18SRNA              | 0.117        | 1.412                    | <i>Tbp</i>     | 0.777   | 0.796                    | C-fos induced growth factor **                                                  |
| <i>Hbegf</i> | Mm00439305_g1   | 18SRNA              | 0.150        | 0.719                    | <i>Tbp</i>     | 0.652   | 0.633                    | Heparin-binding epidermal growth factor **                                      |
| <i>Pdgfa</i> | Mm01205760_m1   | 18SRNA              | 0.129        | 1.081                    | <i>Tbp</i>     | 0.202   | 1.459                    | Platelet-derived growth factor a **                                             |
| <i>Pdgfb</i> | Mm01298578_m1   | 18SRNA              | 0.122        | 1.267                    | <i>Tbp</i>     | 0.986   | 0.987                    | Platelet-derived growth factor b **                                             |
| <i>Pdgfc</i> | Mm03053266_s1   | 18SRNA              | 0.139        | 0.919                    | <i>Tbp</i>     | 0.831   | 0.811                    | Platelet-derived growth factor c **                                             |
| <i>Pdgfd</i> | Mm00546829_m1   | 18SRNA              | 0.114        | 1.579                    | <i>Tbp</i>     | 0.344   | 0.592                    | Platelet-derived growth factor d **                                             |
| <i>Shh</i>   | Mm00436527_m1   | 18SRNA              | 0.139        | 0.918                    | <i>Tbp</i>     | 0.506   | 2.393                    | Sonic hedgehog **                                                               |
| <i>Tgfb1</i> | Mm01178819_m1   | 18SRNA              | 0.157        | 0.704                    | <i>Tbp</i>     | 0.924   | 0.956                    | Transforming growth factor beta 1 **                                            |
| <i>Tgfb2</i> | Mm01321739_m1   | 18SRNA              | 0.161        | 0.627                    | <i>Tbp</i>     | 0.808   | 0.832                    | Transforming growth factor beta 2 **                                            |
| <i>Tgfb3</i> | Mm01307950_m1   | 18SRNA              | 0.133        | 1.019                    | <i>Tbp</i>     | 0.588   | 0.706                    | Transforming growth factor beta 3 **                                            |
| <i>Vegfa</i> | Mm01281449_m1   | 18SRNA              | 0.108        | 1.683                    | <i>Tbp</i>     | 0.810   | 1.233                    | Vascular endothelial growth factor a **                                         |
| <i>Vegfb</i> | Mm00442102_m1   | 18SRNA              | 0.105        | 1.693                    | <i>Tbp</i>     | 0.746   | 1.376                    | Vascular endothelial growth factor b **                                         |
| <i>Vegfc</i> | Mm01202432_m1   | 18SRNA              | 0.135        | 0.981                    | <i>Tbp</i>     | 0.758   | 0.771                    | Vascular endothelial growth factor c **                                         |

## Putatively involved

| Gene symbol          | Taqman Assay ID | GLCE knockout mouse |         |                          | HPSEtg mouse   |         |                          | Function                                     |
|----------------------|-----------------|---------------------|---------|--------------------------|----------------|---------|--------------------------|----------------------------------------------|
|                      |                 | Reference gene      | P-value | Relative fold expression | Reference gene | P-value | Relative fold expression |                                              |
| <i>18S</i>           | Hs99999901_s1   | Reference gene      |         |                          | Reference gene |         |                          | Reference gene                               |
| <i>Actb</i>          | Mm00607939_s1   | Reference gene      |         |                          | Reference gene |         |                          | Reference gene                               |
| <i>Arsa</i>          | Mm00802173_g1   | <i>18SRNA</i>       | 0.336   | 1.195                    | <i>Tbp</i>     | 0.775   | 0.738                    | Desulfation of cerebroside                   |
| <i>Arsq</i>          | Mm00546931_m1   | <i>18SRNA</i>       | 0.945   | 0.982                    | <i>Tbp</i>     | 0.895   | 1.079                    | Paralog of Arsa                              |
| <i>C1galt1</i>       | Mm00473986_m1   | <i>18SRNA</i>       | 0.046   | 0.521                    | <i>Tbp</i>     | 0.549   | 0.736                    | Transferring UDP-Gal to N-GalNAc.            |
| <i>C1galt1c1</i>     | Mm00480676_m1   | <i>18SRNA</i>       | 0.176   | 0.510                    | <i>Tbp</i>     | 0.841   | 0.899                    | C1GALT1-specific chaperone 1                 |
| <i>Chst1</i>         | Mm00517855_m1   | <i>18SRNA</i>       | 0.817   | 1.043                    | <i>Tbp</i>     | 0.512   | 0.496                    | Involved in sulfation of keratan sulfate     |
| <i>Gapdh</i>         | Mm03302249_g1   | Reference gene      |         |                          | Reference gene |         |                          | Reference gene                               |
| <i>Gla</i>           | Mm00516323_m1   | <i>18SRNA</i>       | 0.156   | 0.753                    | <i>Tbp</i>     | 0.127   | 0.536                    | Hydrolysis of galactose units                |
| <i>Glb1</i>          | Mm00515342_m1   | <i>18SRNA</i>       | 0.518   | 1.169                    | <i>Tbp</i>     | 0.447   | 0.578                    | Hydrolysis of galactose units                |
| <i>Glb1l2</i>        | Mm00464245_m1   | <i>18SRNA</i>       | 0.548   | 1.180                    | <i>Tbp</i>     | 0.435   | 0.357                    | Hydrolysis of galactose units                |
| <i>Gnpda1;Gm8615</i> | Mm01254913_g1   | <i>18SRNA</i>       | 0.402   | 1.218                    | <i>Tbp</i>     | 0.324   | 0.455                    | Conversion of GlcNAc-6-P into fructose-6-P   |
| <i>Gnpda2</i>        | Mm00503573_m1   | <i>18SRNA</i>       | 0.001   | 0.641                    | <i>Tbp</i>     | 0.174   | 0.485                    | Conversion of GlcNAc-6-P into fructose-6-P   |
| <i>Hprt1</i>         | Mm01324427_m1   | Reference gene      |         |                          | Reference gene |         |                          | Reference gene                               |
| <i>Kl</i>            | Mm00502002_m1   | <i>18SRNA</i>       | 0.488   | 1.579                    | Not detected   |         |                          | Putative glucuronidase                       |
| <i>Klb</i>           | Mm00473122_m1   | <i>18SRNA</i>       | 0.557   | 4.164                    | <i>Tbp</i>     | 0.455   | 1.714                    | Putative glucuronidase                       |
| <i>Slc17a5</i>       | Mm00555344_m1   | <i>18SRNA</i>       | 0.827   | 0.939                    | <i>Tbp</i>     | 0.662   | 0.758                    | Transport of GlcA from lysosome to cytoplasm |
| <i>Slc35a1</i>       | Mm00442341_m1   | <i>18SRNA</i>       | 0.008   | 0.536                    | <i>Tbp</i>     | 0.840   | 0.901                    | Putative CMP-Sialic Acid Transporter         |
| <i>Tbp</i>           | Mm01277042_m1   | Reference gene      |         |                          | Reference gene |         |                          | Reference gene                               |
| <i>Ugt8a</i>         | Mm00495930_m1   | <i>18SRNA</i>       | 0.411   | 0.628                    | <i>Tbp</i>     | 0.312   | 2.966                    | Transferring galactose to ceramide           |

\* Glc, glucosamine; GlcNAc, N-acetylated glucosamine; Gal, galactosamine; GalNAc, N-acetylated galactosamine; GlcA, glucuronic acid; IdoA, iduronic acid. \*\*Uijtdewilligen *et al.*, 2016.

Genes, for which a signal was not or only partly detected at a given timepoint or multiple timepoints and therefore a fold change and/or p-value could not be calculated based on the available data, are given as 'not detected'. Gene symbol for which all timepoints were classified as 'not detected' do not show a reference gene due to lack of data for a calculation.
